# Supplementary material
Source: MDPI journal article supplement (https://www.mdpi.com/2073-8994/12/10/1714)

# checkCIF/PLATON report

Structure factors have been supplied for datablock(s) I

THIS REPORT IS FOR GUIDANCE ONLY. IF USED AS PART OF A REVIEW PROCEDURE FOR PUBLICATION, IT SHOULD NOT REPLACE THE EXPERTISE OF AN EXPERIENCED CRYSTALLOGRAPHIC REFEREE.

No syntax errors found.      CIF dictionary      Interpreting this report

## Datablock: I

---

Bond precision:    C-C = 0.0040 A

Wavelength=0.71073

Cell:                a=9.2483(3)                b=11.4819(3)                c=12.1508(3)  
                      alpha=112.763(2)        beta=93.341(2)        gamma=106.199(2)  
Temperature:        293 K

|                | Calculated    | Reported      |
|----------------|---------------|---------------|
| Volume         | 1122.23(6)    | 1122.23(5)    |
| Space group    | P -1          | P-1           |
| Hall group     | -P 1          | -P 1          |
| Moiety formula | C26 H24 N2 O5 | C26 H24 N2 O5 |
| Sum formula    | C26 H24 N2 O5 | C26 H24 N2 O5 |
| Mr             | 444.47        | 444.47        |
| Dx,g cm-3      | 1.315         | 1.315         |
| Z              | 2             | 2             |
| Mu (mm-1)      | 0.092         | 0.092         |
| F000           | 468.0         | 468.0         |
| F000'          | 468.23        |               |
| h,k,lmax       | 12,14,15      | 12,14,15      |
| Nref           | 5158          | 5103          |
| Tmin,Tmax      | 0.967,0.984   | 0.947,0.984   |
| Tmin'          | 0.946         |               |

Correction method= # Reported T Limits: Tmin=0.947 Tmax=0.984  
AbsCorr = MULTI-SCAN

Data completeness= 0.989

Theta(max)= 27.520

R(reflections)= 0.0535( 3735)

wR2(reflections)= 0.1547( 5103)

S = 1.025

Npar= 300

---

The following ALERTS were generated. Each ALERT has the format

**test-name\_ALERT\_alert-type\_alert-level.**

Click on the hyperlinks for more details of the test.

---

### Alert level B

PLAT910\_ALERT\_3\_B Missing # of FCF Reflection(s) Below Theta(Min). 16 Note

---

### Alert level C

PLAT199\_ALERT\_1\_C Reported \_cell\_measurement\_temperature ..... (K) 293 Check  
PLAT200\_ALERT\_1\_C Reported \_diffrn\_ambient\_temperature ..... (K) 293 Check  
PLAT213\_ALERT\_2\_C Atom C11 has ADP max/min Ratio ..... 3.5 prolat  
PLAT213\_ALERT\_2\_C Atom C12 has ADP max/min Ratio ..... 3.5 prolat  
PLAT220\_ALERT\_2\_C NonSolvent Resd 1 C Ueq(max)/Ueq(min) Range 5.2 Ratio  
PLAT222\_ALERT\_3\_C NonSolvent Resd 1 H Uiso(max)/Uiso(min) Range 5.0 Ratio  
PLAT230\_ALERT\_2\_C Hirshfeld Test Diff for C12 --C13 7.0 s.u.  
PLAT241\_ALERT\_2\_C High 'MainMol' Ueq as Compared to Neighbors of C11 Check  
PLAT241\_ALERT\_2\_C High 'MainMol' Ueq as Compared to Neighbors of C12 Check  
PLAT241\_ALERT\_2\_C High 'MainMol' Ueq as Compared to Neighbors of C17 Check  
PLAT242\_ALERT\_2\_C Low 'MainMol' Ueq as Compared to Neighbors of C9 Check  
PLAT250\_ALERT\_2\_C Large U3/U1 Ratio for Average U(i,j) Tensor .... 2.3 Note  
PLAT906\_ALERT\_3\_C Large K Value in the Analysis of Variance ..... 2.197 Check  
PLAT911\_ALERT\_3\_C Missing FCF Refl Between Thmin & STh/L= 0.600 25 Report  
PLAT913\_ALERT\_3\_C Missing # of Very Strong Reflections in FCF .... 5 Note

---

### Alert level G

PLAT005\_ALERT\_5\_G No Embedded Refinement Details Found in the CIF Please Do !  
PLAT007\_ALERT\_5\_G Number of Unrefined Donor-H Atoms ..... 1 Report  
PLAT066\_ALERT\_1\_G Predicted and Reported Tmin&Tmax Range Identical ? Check  
PLAT154\_ALERT\_1\_G The s.u.'s on the Cell Angles are Equal ..(Note) 0.002 Degree  
PLAT793\_ALERT\_4\_G Model has Chirality at C2 (Centro SPGR) R Verify  
PLAT793\_ALERT\_4\_G Model has Chirality at C3 (Centro SPGR) R Verify  
PLAT793\_ALERT\_4\_G Model has Chirality at C5 (Centro SPGR) S Verify  
PLAT802\_ALERT\_4\_G CIF Input Record(s) with more than 80 Characters 1 Info  
PLAT899\_ALERT\_4\_G SHELXL97 is Deprecated and Succeeded by SHELXL/ 2018 Note  
PLAT912\_ALERT\_4\_G Missing # of FCF Reflections Above STh/L= 0.600 14 Note  
PLAT978\_ALERT\_2\_G Number C-C Bonds with Positive Residual Density. 4 Info  
PLAT992\_ALERT\_5\_G Repd & Actual \_reflns\_number\_gt Values Differ by 3 Check

---

- 0 **ALERT level A** = Most likely a serious problem - resolve or explain  
1 **ALERT level B** = A potentially serious problem, consider carefully  
15 **ALERT level C** = Check. Ensure it is not caused by an omission or oversight  
12 **ALERT level G** = General information/check it is not something unexpected
- 4 ALERT type 1 CIF construction/syntax error, inconsistent or missing data  
10 ALERT type 2 Indicator that the structure model may be wrong or deficient  
5 ALERT type 3 Indicator that the structure quality may be low  
6 ALERT type 4 Improvement, methodology, query or suggestion  
3 ALERT type 5 Informative message, check
- 

## checkCIF publication errors

---

### Alert level A

PUBL012\_ALERT\_1\_A \_publ\_section\_abstract is missing.  
Abstract of paper in English.

---

### Alert level G

PUBL017\_ALERT\_1\_G The \_publ\_section\_references section is missing or empty.

---

1 **ALERT level A** = Data missing that is essential or data in wrong format  
1 **ALERT level G** = General alerts. Data that may be required is missing

---

## Publication of your CIF

You should attempt to resolve as many as possible of the alerts in all categories. Often the minor alerts point to easily fixed oversights, errors and omissions in your CIF or refinement strategy, so attention to these fine details can be worthwhile. In order to resolve some of the more serious problems it may be necessary to carry out additional measurements or structure refinements. However, the nature of your study may justify the reported deviations from journal submission requirements and the more serious of these should be commented upon in the discussion or experimental section of a paper or in the "special\_details" fields of the CIF. *checkCIF* was carefully designed to identify outliers and unusual parameters, but every test has its limitations and alerts that are not important in a particular case may appear. Conversely, the absence of alerts does not guarantee there are no aspects of the results needing attention. It is up to the individual to critically assess their own results and, if necessary, seek expert advice.

If level A alerts remain, which you believe to be justified deviations, and you intend to submit this CIF for publication in a journal, you should additionally insert an explanation in your CIF using the Validation Reply Form (VRF) below. This will allow your explanation to be considered as part of the review process.

## Validation response form

Please find below a validation response form (VRF) that can be filled in and pasted into your CIF.

```
# start Validation Reply Form
_vrf_PUBL012_GLOBAL
;
PROBLEM: _publ_section_abstract is missing.
RESPONSE: ...
;
# end Validation Reply Form
```

If you wish to submit your CIF for publication in Acta Crystallographica Section C or E, you should upload your CIF via the web. If you wish to submit your CIF for publication in IUCrData you should upload your CIF via the web. If your CIF is to form part of a submission to another IUCr journal, you will be asked, either during electronic submission or by the Co-editor handling your paper, to upload your CIF via our web site.

---

**PLATON version of 18/09/2020; check.def file version of 20/08/2020**

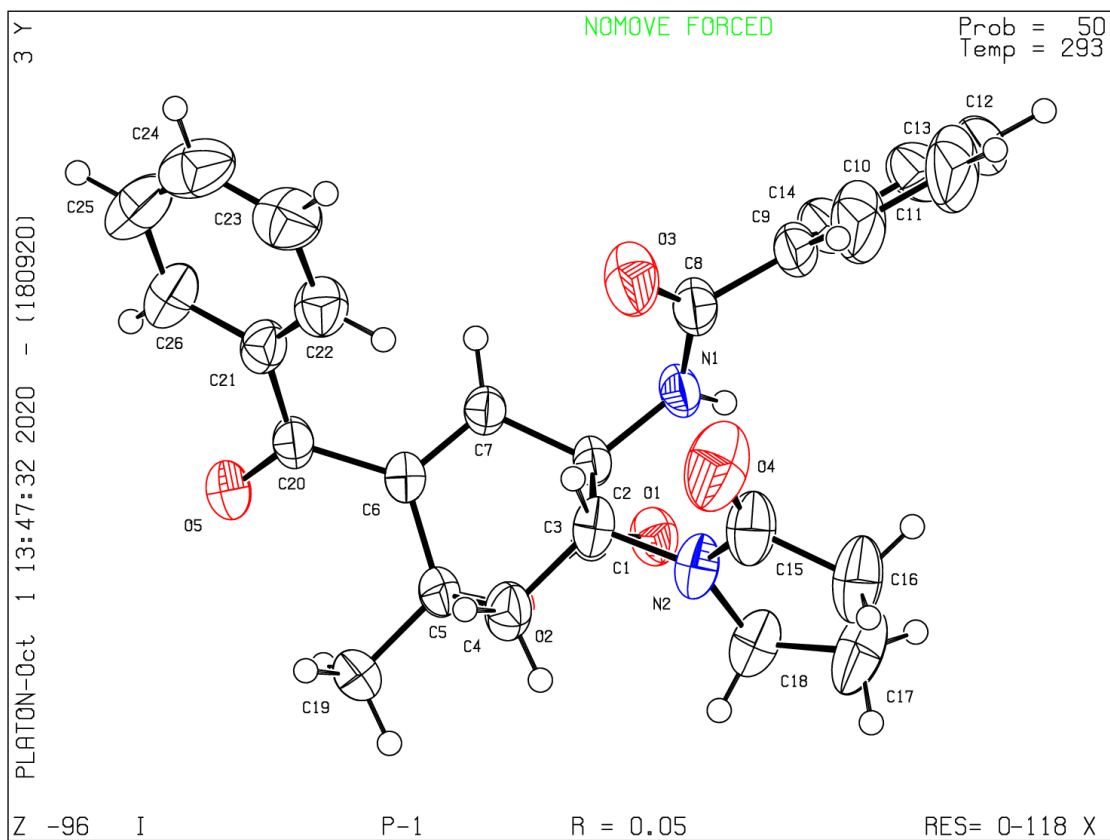

Supplement: s1 [file s1]
