# Supplementary material
Source: MDPI journal article supplement (https://www.mdpi.com/2073-8994/12/10/1714)

# checkCIF/PLATON report

Structure factors have been supplied for datablock(s) I

THIS REPORT IS FOR GUIDANCE ONLY. IF USED AS PART OF A REVIEW PROCEDURE FOR PUBLICATION, IT SHOULD NOT REPLACE THE EXPERTISE OF AN EXPERIENCED CRYSTALLOGRAPHIC REFEREE.

No syntax errors found.      CIF dictionary      Interpreting this report

## Datablock: I

---

Bond precision:    C-C = 0.0053 Å

Wavelength=0.71073

Cell:                    a=11.1004(9)                    b=11.3611(8)                    c=13.2166(9)  
                          alpha=65.350(3)                    beta=89.871(4)                    gamma=81.713(3)  
Temperature:    293 K

|                | Calculated   | Reported     |
|----------------|--------------|--------------|
| Volume         | 1495.97(19)  | 1495.97(19)  |
| Space group    | P -1         | P-1          |
| Hall group     | -P 1         | -P 1         |
| Moiety formula | C14 H19 N O5 | C14 H19 N O5 |
| Sum formula    | C14 H19 N O5 | C14 H19 N O5 |
| Mr             | 281.30       | 281.30       |
| Dx,g cm-3      | 1.249        | 1.249        |
| Z              | 4            | 4            |
| Mu (mm-1)      | 0.095        | 0.095        |
| F000           | 600.0        | 600.0        |
| F000'          | 600.34       |              |
| h,k,lmax       | 12,12,14     | 12,12,14     |
| Nref           | 4061         | 3976         |
| Tmin,Tmax      | 0.977,0.977  | 0.977,0.977  |
| Tmin'          | 0.977        |              |

Correction method= # Reported T Limits: Tmin=0.977 Tmax=0.977  
AbsCorr = MULTI-SCAN

Data completeness= 0.979

Theta(max)= 22.780

R(reflections)= 0.0576( 2685)

wR2(reflections)= 0.1650( 3976)

S = 1.040

Npar= 402

---

The following ALERTS were generated. Each ALERT has the format

**test-name\_ALERT\_alert-type\_alert-level.**

Click on the hyperlinks for more details of the test.

---

### Alert level A

THETM01\_ALERT\_3\_A The value of  $\sin(\theta_{\max})/\lambda$  is less than 0.550  
Calculated  $\sin(\theta_{\max})/\lambda = 0.5448$

**Author Response: Resolution in endo-3b is lower than expected, however,  
the data were of sufficient quality to determine the connectivity.**

PLAT023\_ALERT\_3\_A Resolution (too) Low [ $\sin(\theta)/\lambda < 0.6$ ].. 0.54 Ang-1

**Author Response: Resolution in endo-3b is lower than expected, however,  
the data were of sufficient quality to determine the connectivity.**

---

### Alert level B

PLAT910\_ALERT\_3\_B Missing # of FCF Reflection(s) Below  $\theta_{\min}$ . 12 Note

---

### Alert level C

PLAT088\_ALERT\_3\_C Poor Data / Parameter Ratio ..... 9.89 Note  
PLAT199\_ALERT\_1\_C Reported \_cell\_measurement\_temperature ..... (K) 293 Check  
PLAT200\_ALERT\_1\_C Reported \_diffn\_ambient\_temperature ..... (K) 293 Check  
PLAT241\_ALERT\_2\_C High 'MainMol' Ueq as Compared to Neighbors of C23 Check  
PLAT242\_ALERT\_2\_C Low 'MainMol' Ueq as Compared to Neighbors of O8 Check  
PLAT242\_ALERT\_2\_C Low 'MainMol' Ueq as Compared to Neighbors of C25 Check  
PLAT340\_ALERT\_3\_C Low Bond Precision on C-C Bonds ..... 0.00527 Ang.  
PLAT911\_ALERT\_3\_C Missing FCF Refl Between  $\theta_{\min}$  &  $S_{\theta}/L = 0.545$  71 Report

---

### Alert level G

PLAT003\_ALERT\_2\_G Number of Uiso or Uij Restrained non-H Atoms ... 4 Report  
PLAT005\_ALERT\_5\_G No Embedded Refinement Details Found in the CIF Please Do !  
PLAT007\_ALERT\_5\_G Number of Unrefined Donor-H Atoms ..... 2 Report  
PLAT066\_ALERT\_1\_G Predicted and Reported  $\theta_{\min}$ & $\theta_{\max}$  Range Identical ? Check  
PLAT230\_ALERT\_2\_G Hirshfeld Test Diff for C23 --C24A . 8.6 s.u.  
PLAT301\_ALERT\_3\_G Main Residue Disorder .....(Resd 1 ) 10% Note  
PLAT301\_ALERT\_3\_G Main Residue Disorder .....(Resd 2 ) 5% Note  
PLAT410\_ALERT\_2\_G Short Intra H...H Contact H15 ..H23D . 2.11 Ang.  
x,y,z = 1\_555 Check  
PLAT410\_ALERT\_2\_G Short Intra H...H Contact H15 ..H23A . 2.13 Ang.  
x,y,z = 1\_555 Check  
PLAT779\_ALERT\_4\_G Suspect or Irrelevant (Bond) Angle(s) in CIF . # 7 Check  
C9A -O3 -C9B 1.555 1.555 1.555 34.40 Deg.  
PLAT779\_ALERT\_4\_G Suspect or Irrelevant (Bond) Angle(s) in CIF . # 134 Check  
C24B -C23 -H23B 1.555 1.555 1.555 17.00 Deg.  
PLAT779\_ALERT\_4\_G Suspect or Irrelevant (Bond) Angle(s) in CIF . # 137 Check  
C24A -C23 -H23C 1.555 1.555 1.555 17.20 Deg.  
PLAT779\_ALERT\_4\_G Suspect or Irrelevant (Bond) Angle(s) in CIF . # 145 Check  
H23A -C23 -H23D 1.555 1.555 1.555 2.20 Deg.  
PLAT779\_ALERT\_4\_G Suspect or Irrelevant (Bond) Angle(s) in CIF . # 148 Check  
C23 -C24A -H23C 1.555 1.555 1.555 37.30 Deg.  
PLAT793\_ALERT\_4\_G Model has Chirality at C1 (Centro SPGR) S Verify  
PLAT793\_ALERT\_4\_G Model has Chirality at C3 (Centro SPGR) S Verify

|                                                                    |               |           |
|--------------------------------------------------------------------|---------------|-----------|
| PLAT793_ALERT_4_G Model has Chirality at C6                        | (Centro SPGR) | R Verify  |
| PLAT793_ALERT_4_G Model has Chirality at C15                       | (Centro SPGR) | S Verify  |
| PLAT793_ALERT_4_G Model has Chirality at C17                       | (Centro SPGR) | S Verify  |
| PLAT793_ALERT_4_G Model has Chirality at C20                       | (Centro SPGR) | R Verify  |
| PLAT802_ALERT_4_G CIF Input Record(s) with more than 80 Characters |               | 1 Info    |
| PLAT860_ALERT_3_G Number of Least-Squares Restraints .....         |               | 38 Note   |
| PLAT899_ALERT_4_G SHELXL97 is Deprecated and Succeeded by SHELXL/  |               | 2018 Note |
| PLAT909_ALERT_3_G Percentage of I>2sig(I) Data at Theta(Max) Still |               | 38% Note  |
| PLAT913_ALERT_3_G Missing # of Very Strong Reflections in FCF .... |               | 2 Note    |
| PLAT978_ALERT_2_G Number C-C Bonds with Positive Residual Density. |               | 0 Info    |
| PLAT992_ALERT_5_G Repd & Actual _reflns_number_gt Values Differ by |               | 6 Check   |

---

2 **ALERT level A** = Most likely a serious problem - resolve or explain  
 1 **ALERT level B** = A potentially serious problem, consider carefully  
 8 **ALERT level C** = Check. Ensure it is not caused by an omission or oversight  
 27 **ALERT level G** = General information/check it is not something unexpected

3 ALERT type 1 CIF construction/syntax error, inconsistent or missing data  
 8 ALERT type 2 Indicator that the structure model may be wrong or deficient  
 11 ALERT type 3 Indicator that the structure quality may be low  
 13 ALERT type 4 Improvement, methodology, query or suggestion  
 3 ALERT type 5 Informative message, check

---

## checkCIF publication errors

---

### Alert level A

PUBL012\_ALERT\_1\_A \_publ\_section\_abstract is missing.  
 Abstract of paper in English.

---

### Alert level G

PUBL017\_ALERT\_1\_G The \_publ\_section\_references section is missing or empty.

---

1 **ALERT level A** = Data missing that is essential or data in wrong format  
 1 **ALERT level G** = General alerts. Data that may be required is missing

---

## Publication of your CIF

You should attempt to resolve as many as possible of the alerts in all categories. Often the minor alerts point to easily fixed oversights, errors and omissions in your CIF or refinement strategy, so attention to these fine details can be worthwhile. In order to resolve some of the more serious problems it may be necessary to carry out additional measurements or structure refinements. However, the nature of your study may justify the reported deviations from journal submission requirements and the more serious of these should be commented upon in the discussion or experimental section of a paper or in the "special\_details" fields of the CIF. *checkCIF* was carefully designed to identify outliers and unusual parameters, but every test has its limitations and alerts that are not important in a particular case may appear. Conversely, the absence of alerts does not guarantee there are no aspects of the results needing attention. It is up to the individual to critically assess their own results and, if necessary, seek expert advice.

If level A alerts remain, which you believe to be justified deviations, and you intend to submit this CIF for publication in a journal, you should additionally insert an explanation in your CIF using the Validation Reply Form (VRF) below. This will allow your explanation to be considered as part of the review process.

## Validation response form

Please find below a validation response form (VRF) that can be filled in and pasted into your CIF.

```
# start Validation Reply Form
_vrf_PUBL012_GLOBAL
;
PROBLEM: _publ_section_abstract is missing.
RESPONSE: ...
;
# end Validation Reply Form
```

If you wish to submit your CIF for publication in Acta Crystallographica Section C or E, you should upload your CIF via the web. If you wish to submit your CIF for publication in IUCrData you should upload your CIF via the web. If your CIF is to form part of a submission to another IUCr journal, you will be asked, either during electronic submission or by the Co-editor handling your paper, to upload your CIF via our web site.

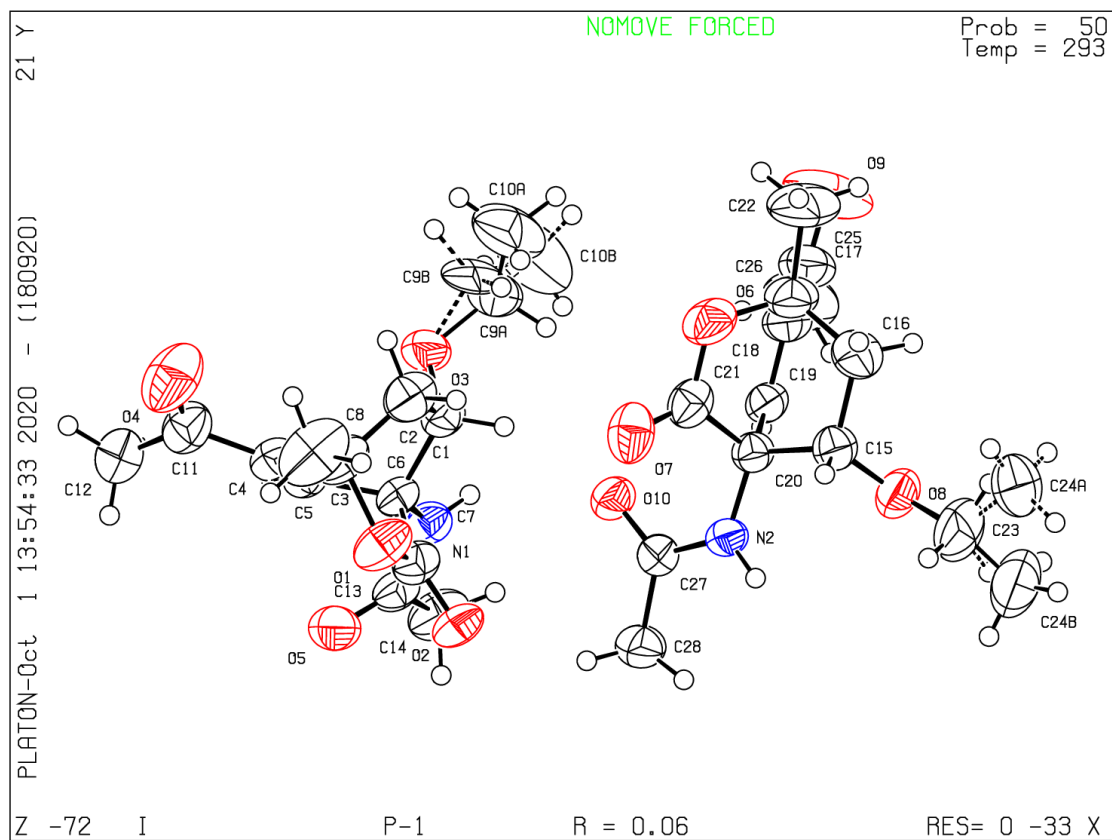

Supplement: s1 [file s1 › endo-3b-checkcif.pdf]
