# Supplementary material
Source: MDPI journal article supplement (https://www.mdpi.com/2073-8994/12/10/1714)
Supplement: s1 [file s1]

Archive with 16 entries (16 files):
- 4a.cif
- 4a-checkcif.pdf
- endo-3a.cif
- endo-3a-checkcif.pdf
- endo-3b.cif
- endo-3b-checkcif.pdf
- endo-3c.cif
- endo-3c-checkcif.pdf
- endo-3d.cif
- endo-3d-checkcif.pdf
- endo-3e-6a.cif
- endo-3e-6a-checkcif.pdf
- exo-3e.cif
- exo-3e-checkcif.pdf
- exo-3f.cif
- exo-3f-checkcif.pdf
