# Supplementary material
Source: MDPI journal article supplement (https://www.mdpi.com/2073-8994/12/10/1714)
Supplement: s1 [file s1 › 4a.cif]

data_4a

_publ_contact_author_name 'Franc Perdih'
_publ_contact_author_address
;
Faculty of Chemistry and Chemical Technology
University of Ljubljana
Ve\<cna pot 113, P. O. Box 537
SI-1000 Ljubljana
Slovenia
;

_publ_contact_author_email franc.perdih@fkkt.uni-lj.si

loop_
_publ_author_name
_publ_author_address

'Kri\<stof Kranjc'
;
Faculty of Chemistry and Chemical Technology
University of Ljubljana
Ve\<cna pot 113, P. O. Box 537
SI-1000 Ljubljana
Slovenia
;

'Amadej Juranovi\<c'
;
Faculty of Chemistry and Chemical Technology
University of Ljubljana
Ve\<cna pot 113, P. O. Box 537
SI-1000 Ljubljana
Slovenia
;

'Marijan Ko\<cevar'
;
Faculty of Chemistry and Chemical Technology
University of Ljubljana
Ve\<cna pot 113, P. O. Box 537
SI-1000 Ljubljana
Slovenia
;

'Franc Perdih'
;
Faculty of Chemistry and Chemical Technology
University of Ljubljana
Ve\<cna pot 113, P. O. Box 537
SI-1000 Ljubljana
Slovenia
;

_publ_requested_journal          'Symmetry' 
_publ_section_title
;
Supramolecular Diversity of Oxabicyclo[2.2.2]octenes Formed Between Substitued 2H-Pyran-2-ones and 
Vinyl-moiety-containing Dienophiles
;
 
_audit_creation_method            SHELXL-97
_chemical_name_systematic
;
rac-Methyl 5-(Benzoylamino)-4-ethoxy-2-methylcyclohexa-1,5-diene-1-carboxylate
;
_chemical_name_common             ?
_chemical_melting_point           ?
_chemical_formula_moiety          'C18 H21 N O4'
_chemical_formula_sum             'C18 H21 N O4'
_chemical_formula_weight          315.36
 
loop_
 _atom_type_symbol
 _atom_type_description
 _atom_type_scat_dispersion_real
 _atom_type_scat_dispersion_imag
 _atom_type_scat_source
 'C'  'C'   0.0033   0.0016
 'International Tables Vol C Tables 4.2.6.8 and 6.1.1.4'
 'H'  'H'   0.0000   0.0000
 'International Tables Vol C Tables 4.2.6.8 and 6.1.1.4'
 'N'  'N'   0.0061   0.0033
 'International Tables Vol C Tables 4.2.6.8 and 6.1.1.4'
 'O'  'O'   0.0106   0.0060
 'International Tables Vol C Tables 4.2.6.8 and 6.1.1.4'
 
_symmetry_cell_setting            orthorhombic
_symmetry_space_group_name_H-M    Pcab
_symmetry_space_group_name_Hall   '-P 2bc 2ac'
 
loop_
 _symmetry_equiv_pos_as_xyz
 'x, y, z'
 '-x, -y+1/2, z+1/2'
 'x+1/2, -y, -z+1/2'
 '-x+1/2, y+1/2, -z'
 '-x, -y, -z'
 'x, y-1/2, -z-1/2'
 '-x-1/2, y, z-1/2'
 'x-1/2, -y-1/2, z'
 
_cell_length_a                    12.1827(3)
_cell_length_b                    14.8081(4)
_cell_length_c                    18.6214(4)
_cell_angle_alpha                 90.00
_cell_angle_beta                  90.00
_cell_angle_gamma                 90.00
_cell_volume                      3359.35(14)
_cell_formula_units_Z             8
_cell_measurement_temperature     293(2)
_cell_measurement_reflns_used     4205
_cell_measurement_theta_min       2.55
_cell_measurement_theta_max       27.48
 
_exptl_crystal_description        block
_exptl_crystal_colour             colorless
_exptl_crystal_size_max           0.50
_exptl_crystal_size_mid           0.20
_exptl_crystal_size_min           0.20
_exptl_crystal_density_meas       ?
_exptl_crystal_density_diffrn     1.247
_exptl_crystal_density_method     'not measured'
_exptl_crystal_F_000              1344
_exptl_absorpt_coefficient_mu     0.088
_exptl_absorpt_correction_type    multi-scan
_exptl_absorpt_correction_T_min   0.9573
_exptl_absorpt_correction_T_max   0.9826
_exptl_absorpt_process_details    'SCALEPACK (Otwinowski & Minor, 1997)'
 
_exptl_special_details
;
204 frames in 5 sets of \w scans. Rotation/frame = 1.8 \%.
Crystal-detector distance = 25 mm. Measuring time  = 150 s/\%.
;
 
_diffrn_ambient_temperature       293(2)
_diffrn_radiation_wavelength      0.71073
_diffrn_radiation_type            MoK\a
_diffrn_radiation_source          'fine-focus sealed tube'
_diffrn_radiation_monochromator   graphite
_diffrn_measurement_device_type   
;
Nonius KappaCCD area-detector diffractometer
;
_diffrn_measurement_method        '\w scans'
_diffrn_detector_area_resol_mean  0.055
_diffrn_standards_number          ?
_diffrn_standards_interval_count  ?
_diffrn_standards_interval_time   ?
_diffrn_standards_decay_%         ?
_diffrn_reflns_number             7151
_diffrn_reflns_av_R_equivalents   0.0285
_diffrn_reflns_av_sigmaI/netI     0.0343
_diffrn_reflns_limit_h_min        -15
_diffrn_reflns_limit_h_max        15
_diffrn_reflns_limit_k_min        -19
_diffrn_reflns_limit_k_max        19
_diffrn_reflns_limit_l_min        -24
_diffrn_reflns_limit_l_max        24
_diffrn_reflns_theta_min          3.52
_diffrn_reflns_theta_max          27.48
_reflns_number_total              3783
_reflns_number_gt                 2511
_reflns_threshold_expression      >2\s(I)
 
_computing_data_collection        'KappaCCD Reference Manual (Nonius, 1998)'
_computing_cell_refinement        'DENZO-SMN (Otwinowski & Minor, 1997)'
_computing_data_reduction         'DENZO-SMN (Otwinowski & Minor, 1997)'
_computing_structure_solution     'SHELXS-97 (Sheldrick, 1997)'
_computing_structure_refinement   'SHELXL-97 (Sheldrick, 1997)'
_computing_molecular_graphics     'ORTEP-3 for Windows version 2.02 (Farrugia, 2008)'
_computing_publication_material   'WinGX publication routines (Farrugia, 1999)'
 
_refine_special_details
;
 Refinement of F^2^ against ALL reflections.  The weighted R-factor wR and
 goodness of fit S are based on F^2^, conventional R-factors R are based
 on F, with F set to zero for negative F^2^. The threshold expression of
 F^2^ > 2\s(F^2^) is used only for calculating R-factors(gt) etc. and is
 not relevant to the choice of reflections for refinement.  R-factors based
 on F^2^ are statistically about twice as large as those based on F, and R-
 factors based on ALL data will be even larger.
;
 
_refine_ls_structure_factor_coef  Fsqd
_refine_ls_matrix_type            full
_refine_ls_weighting_scheme       calc
_refine_ls_weighting_details
 'calc w=1/[\s^2^(Fo^2^)+(0.0685P)^2^+1.5757P] where P=(Fo^2^+2Fc^2^)/3'
_atom_sites_solution_primary      direct
_atom_sites_solution_secondary    difmap
_atom_sites_solution_hydrogens    geom
_refine_ls_hydrogen_treatment     constr
_refine_ls_extinction_method      none
_refine_ls_extinction_coef        ?
_refine_ls_number_reflns          3783
_refine_ls_number_parameters      212
_refine_ls_number_restraints      0
_refine_ls_R_factor_all           0.0940
_refine_ls_R_factor_gt            0.0586
_refine_ls_wR_factor_ref          0.1709
_refine_ls_wR_factor_gt           0.1431
_refine_ls_goodness_of_fit_ref    1.046
_refine_ls_restrained_S_all       1.046
_refine_ls_shift/su_max           0.000
_refine_ls_shift/su_mean          0.000
 
loop_
 _atom_site_label
 _atom_site_type_symbol
 _atom_site_fract_x
 _atom_site_fract_y
 _atom_site_fract_z
 _atom_site_U_iso_or_equiv
 _atom_site_adp_type
 _atom_site_occupancy
 _atom_site_symmetry_multiplicity
 _atom_site_calc_flag
 _atom_site_refinement_flags
 _atom_site_disorder_assembly
 _atom_site_disorder_group
O1 O 0.00458(13) 0.99087(12) 0.82712(10) 0.0639(5) Uani 1 1 d . . .
O2 O 0.2164(2) 1.24431(15) 0.69473(13) 0.0983(8) Uani 1 1 d . . .
O3 O 0.34784(16) 1.20367(12) 0.76958(11) 0.0771(6) Uani 1 1 d . . .
O4 O 0.35227(14) 1.00545(10) 0.94596(9) 0.0566(4) Uani 1 1 d . . .
N1 N 0.23688(15) 0.91350(11) 0.88503(9) 0.0472(4) Uani 1 1 d . . .
H1 H 0.2085 0.8603 0.8856 0.071 Uiso 1 1 calc R . .
C1 C 0.20152(17) 0.97064(14) 0.82874(10) 0.0433(4) Uani 1 1 d . . .
C2 C 0.25238(17) 1.04525(13) 0.80700(10) 0.0436(4) Uani 1 1 d . . .
H2 H 0.3152 1.0645 0.8309 0.052 Uiso 1 1 calc R . .
C3 C 0.21062(16) 1.09758(15) 0.74580(11) 0.0463(5) Uani 1 1 d . . .
C4 C 0.13621(18) 1.06081(17) 0.70018(11) 0.0525(5) Uani 1 1 d . . .
C5 C 0.0945(2) 0.96828(18) 0.71567(12) 0.0583(6) Uani 1 1 d . . .
H5A H 0.1397 0.9250 0.6901 0.070 Uiso 1 1 calc R . .
H5B H 0.0204 0.9632 0.6972 0.070 Uiso 1 1 calc R . .
C6 C 0.09384(18) 0.94357(16) 0.79445(12) 0.0511(5) Uani 1 1 d . . .
H6 H 0.0829 0.8783 0.7997 0.061 Uiso 1 1 calc R . .
C7 C 0.2564(2) 1.18795(16) 0.73319(12) 0.0556(5) Uani 1 1 d . . .
C8 C 0.3969(3) 1.2914(2) 0.7612(2) 0.1137(15) Uani 1 1 d . . .
H8A H 0.3607 1.3338 0.7922 0.171 Uiso 1 1 calc R . .
H8B H 0.3895 1.3107 0.7122 0.171 Uiso 1 1 calc R . .
H8C H 0.4733 1.2883 0.7735 0.171 Uiso 1 1 calc R . .
C9 C 0.0973(2) 1.1005(2) 0.63026(14) 0.0753(8) Uani 1 1 d . . .
H9A H 0.1457 1.1484 0.6161 0.113 Uiso 1 1 calc R . .
H9B H 0.0244 1.1239 0.6362 0.113 Uiso 1 1 calc R . .
H9C H 0.0970 1.0545 0.5939 0.113 Uiso 1 1 calc R . .
C10 C -0.0341(3) 0.9531(3) 0.89157(17) 0.0882(9) Uani 1 1 d . . .
H10A H 0.0247 0.9513 0.9267 0.106 Uiso 1 1 calc R . .
H10B H -0.0588 0.8917 0.8831 0.106 Uiso 1 1 calc R . .
C11 C -0.1256(3) 1.0080(3) 0.91923(19) 0.0984(11) Uani 1 1 d . . .
H11A H -0.1792 1.0163 0.8820 0.148 Uiso 1 1 calc R . .
H11B H -0.0984 1.0657 0.9345 0.148 Uiso 1 1 calc R . .
H11C H -0.1589 0.9777 0.9593 0.148 Uiso 1 1 calc R . .
C12 C 0.30949(15) 0.93151(13) 0.93799(10) 0.0412(4) Uani 1 1 d . . .
C13 C 0.33398(17) 0.85413(13) 0.98758(10) 0.0435(4) Uani 1 1 d . . .
C14 C 0.2637(2) 0.78119(15) 0.99731(13) 0.0563(6) Uani 1 1 d . . .
H14 H 0.1972 0.7795 0.9728 0.068 Uiso 1 1 calc R . .
C15 C 0.2914(2) 0.71118(17) 1.04295(14) 0.0659(7) Uani 1 1 d . . .
H15 H 0.2440 0.6625 1.0488 0.079 Uiso 1 1 calc R . .
C16 C 0.3893(2) 0.71376(18) 1.07957(14) 0.0664(7) Uani 1 1 d . . .
H16 H 0.4083 0.6666 1.1101 0.080 Uiso 1 1 calc R . .
C17 C 0.4596(2) 0.78615(18) 1.07115(14) 0.0653(7) Uani 1 1 d . . .
H17 H 0.5257 0.7877 1.0961 0.078 Uiso 1 1 calc R . .
C18 C 0.43163(18) 0.85657(15) 1.02544(12) 0.0518(5) Uani 1 1 d . . .
H18 H 0.4787 0.9056 1.0203 0.062 Uiso 1 1 calc R . .
 
loop_
 _atom_site_aniso_label
 _atom_site_aniso_U_11
 _atom_site_aniso_U_22
 _atom_site_aniso_U_33
 _atom_site_aniso_U_23
 _atom_site_aniso_U_13
 _atom_site_aniso_U_12
O1 0.0529(9) 0.0699(11) 0.0690(10) 0.0051(8) 0.0073(8) 0.0019(8)
O2 0.1152(17) 0.0688(12) 0.1110(16) 0.0412(12) -0.0442(14) -0.0127(12)
O3 0.0805(12) 0.0623(11) 0.0885(13) 0.0298(9) -0.0282(10) -0.0242(9)
O4 0.0663(10) 0.0410(8) 0.0626(9) 0.0060(7) -0.0157(8) -0.0105(7)
N1 0.0565(10) 0.0345(8) 0.0507(9) 0.0019(7) -0.0088(8) -0.0053(7)
C1 0.0468(10) 0.0410(10) 0.0422(10) -0.0025(8) -0.0022(8) 0.0025(8)
C2 0.0443(10) 0.0417(10) 0.0447(10) 0.0002(8) -0.0026(8) 0.0000(9)
C3 0.0467(10) 0.0487(11) 0.0434(10) 0.0017(8) -0.0002(8) 0.0050(9)
C4 0.0537(12) 0.0631(14) 0.0407(10) 0.0003(9) -0.0029(9) 0.0046(11)
C5 0.0574(13) 0.0658(15) 0.0517(12) -0.0050(11) -0.0083(10) -0.0081(11)
C6 0.0510(12) 0.0498(12) 0.0524(12) -0.0024(9) -0.0046(9) -0.0057(9)
C7 0.0633(13) 0.0538(13) 0.0497(12) 0.0103(10) -0.0062(10) 0.0007(11)
C8 0.121(3) 0.081(2) 0.139(3) 0.051(2) -0.053(3) -0.048(2)
C9 0.0797(17) 0.093(2) 0.0528(13) 0.0072(13) -0.0156(13) 0.0041(16)
C10 0.085(2) 0.103(2) 0.0757(19) 0.0105(17) 0.0198(16) 0.0063(18)
C11 0.0714(19) 0.138(3) 0.086(2) -0.014(2) 0.0186(16) -0.004(2)
C12 0.0425(10) 0.0368(9) 0.0443(10) -0.0002(8) 0.0024(8) 0.0000(8)
C13 0.0489(10) 0.0394(10) 0.0421(10) 0.0019(8) 0.0027(8) -0.0008(8)
C14 0.0573(13) 0.0496(12) 0.0618(13) 0.0104(10) -0.0068(11) -0.0101(10)
C15 0.0758(16) 0.0503(13) 0.0717(16) 0.0154(12) 0.0000(13) -0.0132(12)
C16 0.0776(17) 0.0573(14) 0.0644(15) 0.0222(12) -0.0026(13) 0.0033(12)
C17 0.0596(14) 0.0729(16) 0.0635(14) 0.0210(12) -0.0094(11) -0.0002(12)
C18 0.0528(12) 0.0515(12) 0.0512(11) 0.0085(10) -0.0020(9) -0.0065(10)
 
_geom_special_details
;
 All s.u.'s (except the s.u. in the dihedral angle between two l.s. planes)
 are estimated using the full covariance matrix.  The cell s.u.'s are taken
 into account individually in the estimation of s.u.'s in distances, angles
 and torsion angles; correlations between s.u.'s in cell parameters are only
 used when they are defined by crystal symmetry.  An approximate (isotropic)
 treatment of cell s.u.'s is used for estimating s.u.'s involving l.s. planes.
;
 
loop_
 _geom_bond_atom_site_label_1
 _geom_bond_atom_site_label_2
 _geom_bond_distance
 _geom_bond_site_symmetry_2
 _geom_bond_publ_flag
O1 C10 1.405(3) . ?
O1 C6 1.429(3) . ?
O2 C7 1.203(3) . ?
O3 C7 1.324(3) . ?
O3 C8 1.439(3) . ?
O4 C12 1.222(2) . ?
N1 C12 1.351(3) . ?
N1 C1 1.414(3) . ?
N1 H1 0.8600 . ?
C1 C2 1.330(3) . ?
C1 C6 1.513(3) . ?
C2 C3 1.469(3) . ?
C2 H2 0.9300 . ?
C3 C4 1.356(3) . ?
C3 C7 1.469(3) . ?
C4 C5 1.489(3) . ?
C4 C9 1.505(3) . ?
C5 C6 1.512(3) . ?
C5 H5A 0.9700 . ?
C5 H5B 0.9700 . ?
C6 H6 0.9800 . ?
C8 H8A 0.9600 . ?
C8 H8B 0.9600 . ?
C8 H8C 0.9600 . ?
C9 H9A 0.9600 . ?
C9 H9B 0.9600 . ?
C9 H9C 0.9600 . ?
C10 C11 1.473(5) . ?
C10 H10A 0.9700 . ?
C10 H10B 0.9700 . ?
C11 H11A 0.9600 . ?
C11 H11B 0.9600 . ?
C11 H11C 0.9600 . ?
C12 C13 1.502(3) . ?
C13 C18 1.383(3) . ?
C13 C14 1.390(3) . ?
C14 C15 1.382(3) . ?
C14 H14 0.9300 . ?
C15 C16 1.374(4) . ?
C15 H15 0.9300 . ?
C16 C17 1.381(4) . ?
C16 H16 0.9300 . ?
C17 C18 1.389(3) . ?
C17 H17 0.9300 . ?
C18 H18 0.9300 . ?
 
loop_
 _geom_angle_atom_site_label_1
 _geom_angle_atom_site_label_2
 _geom_angle_atom_site_label_3
 _geom_angle
 _geom_angle_site_symmetry_1
 _geom_angle_site_symmetry_3
 _geom_angle_publ_flag
C10 O1 C6 115.0(2) . . ?
C7 O3 C8 116.9(2) . . ?
C12 N1 C1 128.47(17) . . ?
C12 N1 H1 115.8 . . ?
C1 N1 H1 115.8 . . ?
C2 C1 N1 125.50(19) . . ?
C2 C1 C6 119.71(19) . . ?
N1 C1 C6 114.73(18) . . ?
C1 C2 C3 120.87(19) . . ?
C1 C2 H2 119.6 . . ?
C3 C2 H2 119.6 . . ?
C4 C3 C7 121.3(2) . . ?
C4 C3 C2 120.4(2) . . ?
C7 C3 C2 118.24(18) . . ?
C3 C4 C5 118.41(19) . . ?
C3 C4 C9 126.6(2) . . ?
C5 C4 C9 114.8(2) . . ?
C4 C5 C6 114.36(19) . . ?
C4 C5 H5A 108.7 . . ?
C6 C5 H5A 108.7 . . ?
C4 C5 H5B 108.7 . . ?
C6 C5 H5B 108.7 . . ?
H5A C5 H5B 107.6 . . ?
O1 C6 C5 107.37(19) . . ?
O1 C6 C1 110.50(17) . . ?
C5 C6 C1 109.90(19) . . ?
O1 C6 H6 109.7 . . ?
C5 C6 H6 109.7 . . ?
C1 C6 H6 109.7 . . ?
O2 C7 O3 121.6(2) . . ?
O2 C7 C3 125.0(2) . . ?
O3 C7 C3 113.44(19) . . ?
O3 C8 H8A 109.5 . . ?
O3 C8 H8B 109.5 . . ?
H8A C8 H8B 109.5 . . ?
O3 C8 H8C 109.5 . . ?
H8A C8 H8C 109.5 . . ?
H8B C8 H8C 109.5 . . ?
C4 C9 H9A 109.5 . . ?
C4 C9 H9B 109.5 . . ?
H9A C9 H9B 109.5 . . ?
C4 C9 H9C 109.5 . . ?
H9A C9 H9C 109.5 . . ?
H9B C9 H9C 109.5 . . ?
O1 C10 C11 109.4(3) . . ?
O1 C10 H10A 109.8 . . ?
C11 C10 H10A 109.8 . . ?
O1 C10 H10B 109.8 . . ?
C11 C10 H10B 109.8 . . ?
H10A C10 H10B 108.2 . . ?
C10 C11 H11A 109.5 . . ?
C10 C11 H11B 109.5 . . ?
H11A C11 H11B 109.5 . . ?
C10 C11 H11C 109.5 . . ?
H11A C11 H11C 109.5 . . ?
H11B C11 H11C 109.5 . . ?
O4 C12 N1 123.01(18) . . ?
O4 C12 C13 121.63(18) . . ?
N1 C12 C13 115.35(17) . . ?
C18 C13 C14 118.91(19) . . ?
C18 C13 C12 117.67(18) . . ?
C14 C13 C12 123.43(19) . . ?
C15 C14 C13 120.8(2) . . ?
C15 C14 H14 119.6 . . ?
C13 C14 H14 119.6 . . ?
C16 C15 C14 119.7(2) . . ?
C16 C15 H15 120.1 . . ?
C14 C15 H15 120.1 . . ?
C15 C16 C17 120.2(2) . . ?
C15 C16 H16 119.9 . . ?
C17 C16 H16 119.9 . . ?
C16 C17 C18 120.0(2) . . ?
C16 C17 H17 120.0 . . ?
C18 C17 H17 120.0 . . ?
C13 C18 C17 120.3(2) . . ?
C13 C18 H18 119.9 . . ?
C17 C18 H18 119.9 . . ?
 
loop_
 _geom_torsion_atom_site_label_1
 _geom_torsion_atom_site_label_2
 _geom_torsion_atom_site_label_3
 _geom_torsion_atom_site_label_4
 _geom_torsion
 _geom_torsion_site_symmetry_1
 _geom_torsion_site_symmetry_2
 _geom_torsion_site_symmetry_3
 _geom_torsion_site_symmetry_4
 _geom_torsion_publ_flag
C12 N1 C1 C2 17.4(3) . . . . ?
C12 N1 C1 C6 -159.8(2) . . . . ?
N1 C1 C2 C3 177.43(19) . . . . ?
C6 C1 C2 C3 -5.4(3) . . . . ?
C1 C2 C3 C4 -15.5(3) . . . . ?
C1 C2 C3 C7 168.1(2) . . . . ?
C7 C3 C4 C5 179.1(2) . . . . ?
C2 C3 C4 C5 2.8(3) . . . . ?
C7 C3 C4 C9 5.0(4) . . . . ?
C2 C3 C4 C9 -171.3(2) . . . . ?
C3 C4 C5 C6 28.7(3) . . . . ?
C9 C4 C5 C6 -156.6(2) . . . . ?
C10 O1 C6 C5 157.8(2) . . . . ?
C10 O1 C6 C1 -82.4(3) . . . . ?
C4 C5 C6 O1 74.5(2) . . . . ?
C4 C5 C6 C1 -45.7(3) . . . . ?
C2 C1 C6 O1 -83.2(2) . . . . ?
N1 C1 C6 O1 94.2(2) . . . . ?
C2 C1 C6 C5 35.1(3) . . . . ?
N1 C1 C6 C5 -147.4(2) . . . . ?
C8 O3 C7 O2 0.2(4) . . . . ?
C8 O3 C7 C3 -178.9(3) . . . . ?
C4 C3 C7 O2 18.7(4) . . . . ?
C2 C3 C7 O2 -164.9(3) . . . . ?
C4 C3 C7 O3 -162.2(2) . . . . ?
C2 C3 C7 O3 14.2(3) . . . . ?
C6 O1 C10 C11 -179.9(2) . . . . ?
C1 N1 C12 O4 3.6(3) . . . . ?
C1 N1 C12 C13 -176.87(19) . . . . ?
O4 C12 C13 C18 -22.7(3) . . . . ?
N1 C12 C13 C18 157.83(19) . . . . ?
O4 C12 C13 C14 157.1(2) . . . . ?
N1 C12 C13 C14 -22.4(3) . . . . ?
C18 C13 C14 C15 -1.2(3) . . . . ?
C12 C13 C14 C15 179.0(2) . . . . ?
C13 C14 C15 C16 0.4(4) . . . . ?
C14 C15 C16 C17 0.3(4) . . . . ?
C15 C16 C17 C18 -0.1(4) . . . . ?
C14 C13 C18 C17 1.4(3) . . . . ?
C12 C13 C18 C17 -178.9(2) . . . . ?
C16 C17 C18 C13 -0.7(4) . . . . ?
 
loop_
 _geom_hbond_atom_site_label_D
 _geom_hbond_atom_site_label_H
 _geom_hbond_atom_site_label_A
 _geom_hbond_distance_DH
 _geom_hbond_distance_HA
 _geom_hbond_distance_DA
 _geom_hbond_angle_DHA
 _geom_hbond_site_symmetry_A
N1 H1 O2  0.86 2.28 2.923(3) 131.6 6_557
 
_diffrn_measured_fraction_theta_max    0.984
_diffrn_reflns_theta_full              27.48
_diffrn_measured_fraction_theta_full   0.984
_refine_diff_density_max    0.291
_refine_diff_density_min   -0.249
_refine_diff_density_rms    0.039
