# Supplementary material
Source: MDPI journal article supplement (https://www.mdpi.com/2073-8994/12/10/1714)
Supplement: s1 [file s1 › endo-3a.cif]

data_endo-3a

_publ_contact_author_name 'Franc Perdih'
_publ_contact_author_address
;
Faculty of Chemistry and Chemical Technology
University of Ljubljana
Ve\<cna pot 113, P. O. Box 537
SI-1000 Ljubljana
Slovenia
;

_publ_contact_author_email franc.perdih@fkkt.uni-lj.si

loop_
_publ_author_name
_publ_author_address

'Kri\<stof Kranjc'
;
Faculty of Chemistry and Chemical Technology
University of Ljubljana
Ve\<cna pot 113, P. O. Box 537
SI-1000 Ljubljana
Slovenia
;

'Amadej Juranovi\<c'
;
Faculty of Chemistry and Chemical Technology
University of Ljubljana
Ve\<cna pot 113, P. O. Box 537
SI-1000 Ljubljana
Slovenia
;

'Marijan Ko\<cevar'
;
Faculty of Chemistry and Chemical Technology
University of Ljubljana
Ve\<cna pot 113, P. O. Box 537
SI-1000 Ljubljana
Slovenia
;

'Franc Perdih'
;
Faculty of Chemistry and Chemical Technology
University of Ljubljana
Ve\<cna pot 113, P. O. Box 537
SI-1000 Ljubljana
Slovenia
;

_publ_requested_journal          'Symmetry' 
_publ_section_title
;
Supramolecular Diversity of Oxabicyclo[2.2.2]octenes Formed Between Substitued 2H-Pyran-2-ones and 
Vinyl-moiety-containing Dienophiles
;

_audit_creation_method            SHELXL-97
_chemical_name_systematic
;
N-[rel-(1S,4R,8S)-6-Acetyl-8-ethoxy-1-methyl-3-oxo-2-oxabicyclo[2.2.2]oct-5-ene-4-yl]benzamide
;
_chemical_name_common             ?
_chemical_melting_point           ?
_chemical_formula_moiety          'C19 H21 N O5'
_chemical_formula_sum             'C19 H21 N O5'
_chemical_formula_weight          343.37
 
loop_
 _atom_type_symbol
 _atom_type_description
 _atom_type_scat_dispersion_real
 _atom_type_scat_dispersion_imag
 _atom_type_scat_source
 'C'  'C'   0.0033   0.0016
 'International Tables Vol C Tables 4.2.6.8 and 6.1.1.4'
 'H'  'H'   0.0000   0.0000
 'International Tables Vol C Tables 4.2.6.8 and 6.1.1.4'
 'N'  'N'   0.0061   0.0033
 'International Tables Vol C Tables 4.2.6.8 and 6.1.1.4'
 'O'  'O'   0.0106   0.0060
 'International Tables Vol C Tables 4.2.6.8 and 6.1.1.4'
 
_symmetry_cell_setting            orthorhombic
_symmetry_space_group_name_H-M    Pcab
_symmetry_space_group_name_Hall   '-P 2bc 2ac' 
 
loop_
 _symmetry_equiv_pos_as_xyz
 'x, y, z'
 '-x, -y+1/2, z+1/2'
 'x+1/2, -y, -z+1/2'
 '-x+1/2, y+1/2, -z'
 '-x, -y, -z'
 'x, y-1/2, -z-1/2'
 '-x-1/2, y, z-1/2'
 'x-1/2, -y-1/2, z'
 
_cell_length_a                    13.6258(2)
_cell_length_b                    15.0585(3)
_cell_length_c                    17.0887(3)
_cell_angle_alpha                 90.00
_cell_angle_beta                  90.00
_cell_angle_gamma                 90.00
_cell_volume                      3506.33(11)
_cell_formula_units_Z             8
_cell_measurement_temperature     293(2)
_cell_measurement_reflns_used     4444
_cell_measurement_theta_min       2.55
_cell_measurement_theta_max       27.48
 
_exptl_crystal_description        prism
_exptl_crystal_colour             colorless
_exptl_crystal_size_max           0.50
_exptl_crystal_size_mid           0.38
_exptl_crystal_size_min           0.25
_exptl_crystal_density_meas       ?
_exptl_crystal_density_diffrn     1.301
_exptl_crystal_density_method     'not measured'
_exptl_crystal_F_000              1456
_exptl_absorpt_coefficient_mu     0.094
_exptl_absorpt_correction_type    multi-scan
_exptl_absorpt_correction_T_min   0.9543
_exptl_absorpt_correction_T_max   0.9768
_exptl_absorpt_process_details    'SCALEPACK (Otwinowski & Minor, 1997)'
 
_exptl_special_details
;
184 frames in 4 sets of \w scans. Rotation/frame = 1.9 \%.
Crystal-detector distance = 30.1 mm. Measuring time  = 60 s/\%.
;
 
_diffrn_ambient_temperature       293(2)
_diffrn_radiation_wavelength      0.71073
_diffrn_radiation_type            MoK\a
_diffrn_radiation_source          'fine-focus sealed tube'
_diffrn_radiation_monochromator   graphite
_diffrn_measurement_device_type   
;
Nonius KappaCCD area-detector diffractometer
;
_diffrn_measurement_method        '\w scans'
_diffrn_detector_area_resol_mean  0.055
_diffrn_standards_number          ?
_diffrn_standards_interval_count  ?
_diffrn_standards_interval_time   ?
_diffrn_standards_decay_%         ?
_diffrn_reflns_number             7555
_diffrn_reflns_av_R_equivalents   0.0132
_diffrn_reflns_av_sigmaI/netI     0.0189
_diffrn_reflns_limit_h_min        -17
_diffrn_reflns_limit_h_max        17
_diffrn_reflns_limit_k_min        -19
_diffrn_reflns_limit_k_max        19
_diffrn_reflns_limit_l_min        -22
_diffrn_reflns_limit_l_max        22
_diffrn_reflns_theta_min          3.12
_diffrn_reflns_theta_max          27.48
_reflns_number_total              3990
_reflns_number_gt                 3103
_reflns_threshold_expression      >2\s(I)
 

_computing_data_collection        'KappaCCD Reference Manual (Nonius, 1998)'
_computing_cell_refinement        'DENZO-SMN (Otwinowski & Minor, 1997)'
_computing_data_reduction         'DENZO-SMN (Otwinowski & Minor, 1997)'
_computing_structure_solution     'SHELXS-97 (Sheldrick, 1997)'
_computing_structure_refinement   'SHELXL-97 (Sheldrick, 1997)'
_computing_molecular_graphics     'ORTEP-3 for Windows version 2.02 (Farrugia, 2008)'
_computing_publication_material   'WinGX publication routines (Farrugia, 1999)'
 
_refine_special_details
;
 Refinement of F^2^ against ALL reflections.  The weighted R-factor wR and
 goodness of fit S are based on F^2^, conventional R-factors R are based
 on F, with F set to zero for negative F^2^. The threshold expression of
 F^2^ > 2\s(F^2^) is used only for calculating R-factors(gt) etc. and is
 not relevant to the choice of reflections for refinement.  R-factors based
 on F^2^ are statistically about twice as large as those based on F, and R-
 factors based on ALL data will be even larger.
;
 
_refine_ls_structure_factor_coef  Fsqd
_refine_ls_matrix_type            full
_refine_ls_weighting_scheme       calc
_refine_ls_weighting_details
 'calc w=1/[\s^2^(Fo^2^)+(0.0501P)^2^+1.0157P] where P=(Fo^2^+2Fc^2^)/3'
_atom_sites_solution_primary      direct
_atom_sites_solution_secondary    difmap
_atom_sites_solution_hydrogens    geom
_refine_ls_hydrogen_treatment     constr
_refine_ls_extinction_method      none
_refine_ls_extinction_coef        ?
_refine_ls_number_reflns          3990
_refine_ls_number_parameters      230
_refine_ls_number_restraints      0
_refine_ls_R_factor_all           0.0595
_refine_ls_R_factor_gt            0.0442
_refine_ls_wR_factor_ref          0.1206
_refine_ls_wR_factor_gt           0.1092
_refine_ls_goodness_of_fit_ref    1.050
_refine_ls_restrained_S_all       1.050
_refine_ls_shift/su_max           0.001
_refine_ls_shift/su_mean          0.000
 
loop_
 _atom_site_label
 _atom_site_type_symbol
 _atom_site_fract_x
 _atom_site_fract_y
 _atom_site_fract_z
 _atom_site_U_iso_or_equiv
 _atom_site_adp_type
 _atom_site_occupancy
 _atom_site_symmetry_multiplicity
 _atom_site_calc_flag
 _atom_site_refinement_flags
 _atom_site_disorder_assembly
 _atom_site_disorder_group
N1 N 0.48007(8) 0.90678(8) 0.92263(6) 0.0425(3) Uani 1 1 d . . .
H1 H 0.4471 0.8958 0.9644 0.064 Uiso 1 1 calc R . .
O1 O 0.73716(7) 0.96965(7) 0.90285(6) 0.0487(3) Uani 1 1 d . . .
O2 O 0.60509(8) 1.05432(7) 0.91472(6) 0.0533(3) Uani 1 1 d . . .
O3 O 0.47827(7) 0.95075(8) 0.79656(6) 0.0531(3) Uani 1 1 d . . .
O4 O 0.57333(7) 0.77853(7) 1.01849(5) 0.0485(3) Uani 1 1 d . . .
O5 O 0.85236(10) 0.75513(11) 0.79091(8) 0.0834(4) Uani 1 1 d . . .
C1 C 0.64057(10) 0.98125(9) 0.91148(8) 0.0416(3) Uani 1 1 d . . .
C2 C 0.58452(9) 0.89347(9) 0.92169(7) 0.0381(3) Uani 1 1 d . . .
C3 C 0.62205(10) 0.85899(9) 1.00203(7) 0.0396(3) Uani 1 1 d . . .
H3 H 0.6060 0.9026 1.0427 0.048 Uiso 1 1 calc R . .
C4 C 0.73403(10) 0.84975(10) 0.99619(8) 0.0470(3) Uani 1 1 d . . .
H4A H 0.7526 0.7888 1.0070 0.056 Uiso 1 1 calc R . .
H4B H 0.7649 0.8874 1.0352 0.056 Uiso 1 1 calc R . .
C5 C 0.77086(10) 0.87626(10) 0.91403(9) 0.0471(3) Uani 1 1 d . . .
C6 C 0.71648(11) 0.82059(9) 0.85396(8) 0.0445(3) Uani 1 1 d . . .
C7 C 0.61922(10) 0.82984(9) 0.85995(7) 0.0414(3) Uani 1 1 d . . .
H7 H 0.5759 0.7989 0.8280 0.050 Uiso 1 1 calc R . .
C8 C 0.76421(13) 0.76270(10) 0.79405(9) 0.0548(4) Uani 1 1 d . . .
C9 C 0.70006(16) 0.71541(13) 0.73680(11) 0.0731(5) Uani 1 1 d . . .
H9A H 0.7385 0.6732 0.7079 0.110 Uiso 1 1 calc R . .
H9B H 0.6717 0.7577 0.7013 0.110 Uiso 1 1 calc R . .
H9C H 0.6487 0.6850 0.7643 0.110 Uiso 1 1 calc R . .
C10 C 0.88161(12) 0.88204(14) 0.91026(11) 0.0677(5) Uani 1 1 d . . .
H10A H 0.9046 0.9236 0.9487 0.101 Uiso 1 1 calc R . .
H10B H 0.9012 0.9015 0.8591 0.101 Uiso 1 1 calc R . .
H10C H 0.9094 0.8246 0.9206 0.101 Uiso 1 1 calc R . .
C11 C 0.57212(15) 0.75976(13) 1.10057(9) 0.0689(5) Uani 1 1 d . . .
H11A H 0.5347 0.8051 1.1277 0.083 Uiso 1 1 calc R . .
H11B H 0.6386 0.7608 1.1208 0.083 Uiso 1 1 calc R . .
C12 C 0.5282(2) 0.67253(15) 1.11518(12) 0.0924(7) Uani 1 1 d . . .
H12A H 0.5675 0.6274 1.0908 0.139 Uiso 1 1 calc R . .
H12B H 0.4631 0.6711 1.0938 0.139 Uiso 1 1 calc R . .
H12C H 0.5253 0.6620 1.1705 0.139 Uiso 1 1 calc R . .
C13 C 0.43344(10) 0.93673(9) 0.85742(8) 0.0406(3) Uani 1 1 d . . .
C14 C 0.32529(9) 0.95104(9) 0.86349(8) 0.0386(3) Uani 1 1 d . . .
C15 C 0.28120(10) 1.00629(11) 0.80873(9) 0.0488(3) Uani 1 1 d . . .
H15 H 0.3196 1.0348 0.7714 0.059 Uiso 1 1 calc R . .
C16 C 0.18104(11) 1.01930(11) 0.80929(10) 0.0559(4) Uani 1 1 d . . .
H16 H 0.1522 1.0571 0.7729 0.067 Uiso 1 1 calc R . .
C17 C 0.12374(11) 0.97624(11) 0.86375(11) 0.0564(4) Uani 1 1 d . . .
H17 H 0.0561 0.9844 0.8636 0.068 Uiso 1 1 calc R . .
C18 C 0.16610(11) 0.92125(11) 0.91838(10) 0.0548(4) Uani 1 1 d . . .
H18 H 0.1271 0.8923 0.9551 0.066 Uiso 1 1 calc R . .
C19 C 0.26690(10) 0.90891(10) 0.91879(8) 0.0450(3) Uani 1 1 d . . .
H19 H 0.2955 0.8723 0.9562 0.054 Uiso 1 1 calc R . .
 
loop_
 _atom_site_aniso_label
 _atom_site_aniso_U_11
 _atom_site_aniso_U_22
 _atom_site_aniso_U_33
 _atom_site_aniso_U_23
 _atom_site_aniso_U_13
 _atom_site_aniso_U_12
N1 0.0364(6) 0.0572(7) 0.0338(5) 0.0032(5) 0.0036(4) 0.0033(5)
O1 0.0448(5) 0.0485(5) 0.0527(6) 0.0024(4) 0.0047(4) -0.0039(4)
O2 0.0654(7) 0.0443(5) 0.0501(6) 0.0013(4) 0.0032(5) 0.0071(5)
O3 0.0447(5) 0.0781(7) 0.0365(5) 0.0079(5) 0.0057(4) 0.0004(5)
O4 0.0600(6) 0.0516(6) 0.0340(5) 0.0041(4) -0.0007(4) -0.0092(5)
O5 0.0720(9) 0.0920(10) 0.0861(10) -0.0107(8) 0.0297(7) 0.0211(7)
C1 0.0454(7) 0.0457(7) 0.0337(6) 0.0010(5) 0.0021(5) 0.0019(6)
C2 0.0365(6) 0.0448(7) 0.0330(6) 0.0004(5) 0.0018(5) 0.0024(5)
C3 0.0440(7) 0.0424(7) 0.0324(6) -0.0005(5) 0.0008(5) -0.0001(5)
C4 0.0442(8) 0.0557(8) 0.0411(7) 0.0023(6) -0.0028(6) 0.0046(6)
C5 0.0410(7) 0.0534(8) 0.0470(8) 0.0031(6) 0.0034(6) 0.0050(6)
C6 0.0489(8) 0.0465(7) 0.0381(7) 0.0040(6) 0.0059(6) 0.0071(6)
C7 0.0492(7) 0.0427(7) 0.0323(6) 0.0015(5) 0.0012(5) 0.0005(6)
C8 0.0687(10) 0.0497(8) 0.0458(8) 0.0068(7) 0.0162(7) 0.0133(7)
C9 0.1015(14) 0.0658(11) 0.0520(10) -0.0124(8) 0.0136(9) 0.0110(10)
C10 0.0430(8) 0.0899(13) 0.0701(11) 0.0024(10) 0.0039(8) 0.0025(8)
C11 0.0907(13) 0.0771(12) 0.0388(8) 0.0142(8) -0.0042(8) -0.0178(10)
C12 0.136(2) 0.0874(14) 0.0540(11) 0.0165(10) 0.0092(12) -0.0353(14)
C13 0.0392(7) 0.0467(7) 0.0359(7) 0.0011(5) 0.0012(5) -0.0011(5)
C14 0.0386(7) 0.0417(7) 0.0356(6) -0.0001(5) 0.0005(5) -0.0021(5)
C15 0.0445(7) 0.0563(8) 0.0455(8) 0.0106(6) -0.0021(6) -0.0031(6)
C16 0.0478(8) 0.0591(9) 0.0609(10) 0.0111(8) -0.0096(7) 0.0031(7)
C17 0.0367(7) 0.0608(9) 0.0717(11) -0.0009(8) -0.0014(7) -0.0002(7)
C18 0.0456(8) 0.0602(9) 0.0586(9) 0.0036(7) 0.0110(7) -0.0091(7)
C19 0.0439(7) 0.0479(7) 0.0432(7) 0.0062(6) 0.0018(6) -0.0021(6)
 
_geom_special_details
;
 All s.u.'s (except the s.u. in the dihedral angle between two l.s. planes)
 are estimated using the full covariance matrix.  The cell s.u.'s are taken
 into account individually in the estimation of s.u.'s in distances, angles
 and torsion angles; correlations between s.u.'s in cell parameters are only
 used when they are defined by crystal symmetry.  An approximate (isotropic)
 treatment of cell s.u.'s is used for estimating s.u.'s involving l.s. planes.
;
 
loop_
 _geom_bond_atom_site_label_1
 _geom_bond_atom_site_label_2
 _geom_bond_distance
 _geom_bond_site_symmetry_2
 _geom_bond_publ_flag
N1 C13 1.3598(17) . ?
N1 C2 1.4374(16) . ?
N1 H1 0.8600 . ?
O1 C1 1.3358(17) . ?
O1 C5 1.4916(18) . ?
O2 C1 1.2032(17) . ?
O3 C13 1.2245(16) . ?
O4 C3 1.4099(16) . ?
O4 C11 1.4309(17) . ?
O5 C8 1.208(2) . ?
C1 C2 1.5365(19) . ?
C2 C7 1.5017(18) . ?
C2 C3 1.5543(17) . ?
C3 C4 1.5355(19) . ?
C3 H3 0.9800 . ?
C4 C5 1.543(2) . ?
C4 H4A 0.9700 . ?
C4 H4B 0.9700 . ?
C5 C10 1.513(2) . ?
C5 C6 1.519(2) . ?
C6 C7 1.3364(19) . ?
C6 C8 1.494(2) . ?
C7 H7 0.9300 . ?
C8 C9 1.493(3) . ?
C9 H9A 0.9600 . ?
C9 H9B 0.9600 . ?
C9 H9C 0.9600 . ?
C10 H10A 0.9600 . ?
C10 H10B 0.9600 . ?
C10 H10C 0.9600 . ?
C11 C12 1.465(3) . ?
C11 H11A 0.9700 . ?
C11 H11B 0.9700 . ?
C12 H12A 0.9600 . ?
C12 H12B 0.9600 . ?
C12 H12C 0.9600 . ?
C13 C14 1.4929(18) . ?
C14 C19 1.3886(19) . ?
C14 C15 1.3889(19) . ?
C15 C16 1.379(2) . ?
C15 H15 0.9300 . ?
C16 C17 1.377(2) . ?
C16 H16 0.9300 . ?
C17 C18 1.375(2) . ?
C17 H17 0.9300 . ?
C18 C19 1.386(2) . ?
C18 H18 0.9300 . ?
C19 H19 0.9300 . ?
 
loop_
 _geom_angle_atom_site_label_1
 _geom_angle_atom_site_label_2
 _geom_angle_atom_site_label_3
 _geom_angle
 _geom_angle_site_symmetry_1
 _geom_angle_site_symmetry_3
 _geom_angle_publ_flag
C13 N1 C2 119.98(11) . . ?
C13 N1 H1 120.0 . . ?
C2 N1 H1 120.0 . . ?
C1 O1 C5 114.36(10) . . ?
C3 O4 C11 111.76(11) . . ?
O2 C1 O1 121.37(13) . . ?
O2 C1 C2 125.58(13) . . ?
O1 C1 C2 112.94(11) . . ?
N1 C2 C7 114.11(11) . . ?
N1 C2 C1 111.93(11) . . ?
C7 C2 C1 108.22(10) . . ?
N1 C2 C3 111.25(10) . . ?
C7 C2 C3 107.70(10) . . ?
C1 C2 C3 102.95(10) . . ?
O4 C3 C4 113.76(11) . . ?
O4 C3 C2 107.96(10) . . ?
C4 C3 C2 107.44(10) . . ?
O4 C3 H3 109.2 . . ?
C4 C3 H3 109.2 . . ?
C2 C3 H3 109.2 . . ?
C3 C4 C5 111.03(11) . . ?
C3 C4 H4A 109.4 . . ?
C5 C4 H4A 109.4 . . ?
C3 C4 H4B 109.4 . . ?
C5 C4 H4B 109.4 . . ?
H4A C4 H4B 108.0 . . ?
O1 C5 C10 104.33(13) . . ?
O1 C5 C6 106.48(11) . . ?
C10 C5 C6 119.32(13) . . ?
O1 C5 C4 105.09(11) . . ?
C10 C5 C4 112.20(13) . . ?
C6 C5 C4 108.27(12) . . ?
C7 C6 C8 123.04(14) . . ?
C7 C6 C5 112.00(12) . . ?
C8 C6 C5 124.97(13) . . ?
C6 C7 C2 115.63(12) . . ?
C6 C7 H7 122.2 . . ?
C2 C7 H7 122.2 . . ?
O5 C8 C9 120.55(15) . . ?
O5 C8 C6 121.24(16) . . ?
C9 C8 C6 118.20(15) . . ?
C8 C9 H9A 109.5 . . ?
C8 C9 H9B 109.5 . . ?
H9A C9 H9B 109.5 . . ?
C8 C9 H9C 109.5 . . ?
H9A C9 H9C 109.5 . . ?
H9B C9 H9C 109.5 . . ?
C5 C10 H10A 109.5 . . ?
C5 C10 H10B 109.5 . . ?
H10A C10 H10B 109.5 . . ?
C5 C10 H10C 109.5 . . ?
H10A C10 H10C 109.5 . . ?
H10B C10 H10C 109.5 . . ?
O4 C11 C12 110.42(16) . . ?
O4 C11 H11A 109.6 . . ?
C12 C11 H11A 109.6 . . ?
O4 C11 H11B 109.6 . . ?
C12 C11 H11B 109.6 . . ?
H11A C11 H11B 108.1 . . ?
C11 C12 H12A 109.5 . . ?
C11 C12 H12B 109.5 . . ?
H12A C12 H12B 109.5 . . ?
C11 C12 H12C 109.5 . . ?
H12A C12 H12C 109.5 . . ?
H12B C12 H12C 109.5 . . ?
O3 C13 N1 121.34(12) . . ?
O3 C13 C14 121.77(12) . . ?
N1 C13 C14 116.88(11) . . ?
C19 C14 C15 118.97(13) . . ?
C19 C14 C13 123.15(12) . . ?
C15 C14 C13 117.82(12) . . ?
C16 C15 C14 120.57(14) . . ?
C16 C15 H15 119.7 . . ?
C14 C15 H15 119.7 . . ?
C17 C16 C15 119.94(14) . . ?
C17 C16 H16 120.0 . . ?
C15 C16 H16 120.0 . . ?
C18 C17 C16 120.30(14) . . ?
C18 C17 H17 119.9 . . ?
C16 C17 H17 119.9 . . ?
C17 C18 C19 120.01(14) . . ?
C17 C18 H18 120.0 . . ?
C19 C18 H18 120.0 . . ?
C18 C19 C14 120.20(14) . . ?
C18 C19 H19 119.9 . . ?
C14 C19 H19 119.9 . . ?
 
loop_
 _geom_torsion_atom_site_label_1
 _geom_torsion_atom_site_label_2
 _geom_torsion_atom_site_label_3
 _geom_torsion_atom_site_label_4
 _geom_torsion
 _geom_torsion_site_symmetry_1
 _geom_torsion_site_symmetry_2
 _geom_torsion_site_symmetry_3
 _geom_torsion_site_symmetry_4
 _geom_torsion_publ_flag
C5 O1 C1 O2 169.72(13) . . . . ?
C5 O1 C1 C2 -6.63(15) . . . . ?
C13 N1 C2 C7 -57.80(17) . . . . ?
C13 N1 C2 C1 65.53(15) . . . . ?
C13 N1 C2 C3 -179.90(12) . . . . ?
O2 C1 C2 N1 9.91(18) . . . . ?
O1 C1 C2 N1 -173.91(11) . . . . ?
O2 C1 C2 C7 136.51(14) . . . . ?
O1 C1 C2 C7 -47.32(14) . . . . ?
O2 C1 C2 C3 -109.66(15) . . . . ?
O1 C1 C2 C3 66.52(13) . . . . ?
C11 O4 C3 C4 83.78(15) . . . . ?
C11 O4 C3 C2 -157.08(13) . . . . ?
N1 C2 C3 O4 58.72(14) . . . . ?
C7 C2 C3 O4 -67.03(13) . . . . ?
C1 C2 C3 O4 178.76(10) . . . . ?
N1 C2 C3 C4 -178.20(11) . . . . ?
C7 C2 C3 C4 56.05(14) . . . . ?
C1 C2 C3 C4 -58.16(13) . . . . ?
O4 C3 C4 C5 118.85(13) . . . . ?
C2 C3 C4 C5 -0.58(15) . . . . ?
C1 O1 C5 C10 -174.03(12) . . . . ?
C1 O1 C5 C6 58.92(14) . . . . ?
C1 O1 C5 C4 -55.81(14) . . . . ?
C3 C4 C5 O1 58.08(14) . . . . ?
C3 C4 C5 C10 170.84(14) . . . . ?
C3 C4 C5 C6 -55.40(15) . . . . ?
O1 C5 C6 C7 -55.78(15) . . . . ?
C10 C5 C6 C7 -173.30(14) . . . . ?
C4 C5 C6 C7 56.77(15) . . . . ?
O1 C5 C6 C8 123.52(13) . . . . ?
C10 C5 C6 C8 6.0(2) . . . . ?
C4 C5 C6 C8 -123.93(14) . . . . ?
C8 C6 C7 C2 -177.79(12) . . . . ?
C5 C6 C7 C2 1.53(17) . . . . ?
N1 C2 C7 C6 175.61(12) . . . . ?
C1 C2 C7 C6 50.30(15) . . . . ?
C3 C2 C7 C6 -60.36(15) . . . . ?
C7 C6 C8 O5 -179.15(15) . . . . ?
C5 C6 C8 O5 1.6(2) . . . . ?
C7 C6 C8 C9 2.0(2) . . . . ?
C5 C6 C8 C9 -177.24(14) . . . . ?
C3 O4 C11 C12 -175.41(17) . . . . ?
C2 N1 C13 O3 1.9(2) . . . . ?
C2 N1 C13 C14 -178.54(12) . . . . ?
O3 C13 C14 C19 156.88(14) . . . . ?
N1 C13 C14 C19 -22.7(2) . . . . ?
O3 C13 C14 C15 -20.2(2) . . . . ?
N1 C13 C14 C15 160.17(13) . . . . ?
C19 C14 C15 C16 0.1(2) . . . . ?
C13 C14 C15 C16 177.37(14) . . . . ?
C14 C15 C16 C17 -1.0(2) . . . . ?
C15 C16 C17 C18 0.9(3) . . . . ?
C16 C17 C18 C19 0.0(3) . . . . ?
C17 C18 C19 C14 -0.8(2) . . . . ?
C15 C14 C19 C18 0.8(2) . . . . ?
C13 C14 C19 C18 -176.30(14) . . . . ?
 
loop_
 _geom_hbond_atom_site_label_D
 _geom_hbond_atom_site_label_H
 _geom_hbond_atom_site_label_A
 _geom_hbond_distance_DH
 _geom_hbond_distance_HA
 _geom_hbond_distance_DA
 _geom_hbond_angle_DHA
 _geom_hbond_site_symmetry_A
N1 H1 O2  0.86 2.31 3.0684(15) 147.2 5_677
 
_diffrn_measured_fraction_theta_max    0.991
_diffrn_reflns_theta_full              27.48
_diffrn_measured_fraction_theta_full   0.991
_refine_diff_density_max    0.191
_refine_diff_density_min   -0.194
_refine_diff_density_rms    0.032
