# Supplementary material
Source: MDPI journal article supplement (https://www.mdpi.com/2073-8994/12/10/1714)
Supplement: s1 [file s1 › endo-3b.cif]

data_endo-3b

_publ_contact_author_name 'Franc Perdih'
_publ_contact_author_address
;
Faculty of Chemistry and Chemical Technology
University of Ljubljana
Ve\<cna pot 113, P. O. Box 537
SI-1000 Ljubljana
Slovenia
;

_publ_contact_author_email franc.perdih@fkkt.uni-lj.si

loop_
_publ_author_name
_publ_author_address

'Kri\<stof Kranjc'
;
Faculty of Chemistry and Chemical Technology
University of Ljubljana
Ve\<cna pot 113, P. O. Box 537
SI-1000 Ljubljana
Slovenia
;

'Amadej Juranovi\<c'
;
Faculty of Chemistry and Chemical Technology
University of Ljubljana
Ve\<cna pot 113, P. O. Box 537
SI-1000 Ljubljana
Slovenia
;

'Marijan Ko\<cevar'
;
Faculty of Chemistry and Chemical Technology
University of Ljubljana
Ve\<cna pot 113, P. O. Box 537
SI-1000 Ljubljana
Slovenia
;

'Franc Perdih'
;
Faculty of Chemistry and Chemical Technology
University of Ljubljana
Ve\<cna pot 113, P. O. Box 537
SI-1000 Ljubljana
Slovenia
;

_publ_requested_journal          'Symmetry' 
_publ_section_title
;
Supramolecular Diversity of Oxabicyclo[2.2.2]octenes Formed Between Substitued 2H-Pyran-2-ones and 
Vinyl-moiety-containing Dienophiles
;
 
# start Validation Reply Form
_vrf_THETM01_I
;
PROBLEM: The value of sine(theta_max)/wavelength is less than 0.550
RESPONSE: Resolution in endo-3b is lower than expected, however, 
the data were of sufficient quality 
to determine the connectivity. 
;
_vrf_PLAT023_I
;PROBLEM: Resolution (too) Low [sin(theta)/Lambda < 0.6]..       0.54 Ang-1
RESPONSE: Resolution in endo-3b is lower than expected, however, 
the data were of sufficient quality 
to determine the connectivity. 
;
# end Validation Reply Form

_audit_creation_method            SHELXL-97
_chemical_name_systematic
;
 ?
;
_chemical_name_common             ?
_chemical_melting_point           ?
_chemical_formula_moiety          'C14 H19 N O5'
_chemical_formula_sum             'C14 H19 N O5'
_chemical_formula_weight          281.30
 
loop_
 _atom_type_symbol
 _atom_type_description
 _atom_type_scat_dispersion_real
 _atom_type_scat_dispersion_imag
 _atom_type_scat_source
 'C'  'C'   0.0033   0.0016
 'International Tables Vol C Tables 4.2.6.8 and 6.1.1.4'
 'H'  'H'   0.0000   0.0000
 'International Tables Vol C Tables 4.2.6.8 and 6.1.1.4'
 'N'  'N'   0.0061   0.0033
 'International Tables Vol C Tables 4.2.6.8 and 6.1.1.4'
 'O'  'O'   0.0106   0.0060
 'International Tables Vol C Tables 4.2.6.8 and 6.1.1.4'
 
_symmetry_cell_setting            triclinic
_symmetry_space_group_name_H-M    P-1
_symmetry_space_group_name_Hall   '-P 1'
 
loop_
 _symmetry_equiv_pos_as_xyz
 'x, y, z'
 '-x, -y, -z'
 
_cell_length_a                    11.1004(9)
_cell_length_b                    11.3611(8)
_cell_length_c                    13.2166(9)
_cell_angle_alpha                 65.350(3)
_cell_angle_beta                  89.871(4)
_cell_angle_gamma                 81.713(3)
_cell_volume                      1495.97(19)
_cell_formula_units_Z             4
_cell_measurement_temperature     293(2)
_cell_measurement_reflns_used     3461
_cell_measurement_theta_min       2.55
_cell_measurement_theta_max       22.72
 
_exptl_crystal_description        prism
_exptl_crystal_colour             colorless
_exptl_crystal_size_max           0.25
_exptl_crystal_size_mid           0.25
_exptl_crystal_size_min           0.25
_exptl_crystal_density_meas       ?
_exptl_crystal_density_diffrn     1.249
_exptl_crystal_density_method     'not measured'
_exptl_crystal_F_000              600
_exptl_absorpt_coefficient_mu     0.095
_exptl_absorpt_correction_type    multi-scan
_exptl_absorpt_correction_T_min   0.9767
_exptl_absorpt_correction_T_max   0.9767
_exptl_absorpt_process_details    'SCALEPACK (Otwinowski & Minor, 1997)'
 
_exptl_special_details
;
118 frames in 3 sets of \w scans. Rotation/frame = 2.0 \%.
Crystal-detector distance = 25.0 mm. Measuring time  = 100 s/\%.
;
 
_diffrn_ambient_temperature       293(2)
_diffrn_radiation_wavelength      0.71073
_diffrn_radiation_type            MoK\a
_diffrn_radiation_source          'fine-focus sealed tube'
_diffrn_radiation_monochromator   graphite
_diffrn_measurement_device_type   
;
Nonius KappaCCD area-detector diffractometer
;
_diffrn_measurement_method        '\w scans'
_diffrn_detector_area_resol_mean  0.055
_diffrn_standards_number          ?
_diffrn_standards_interval_count  ?
_diffrn_standards_interval_time   ?
_diffrn_standards_decay_%         ?
_diffrn_reflns_number             6695
_diffrn_reflns_av_R_equivalents   0.0459
_diffrn_reflns_av_sigmaI/netI     0.0658
_diffrn_reflns_limit_h_min        -12
_diffrn_reflns_limit_h_max        12
_diffrn_reflns_limit_k_min        -12
_diffrn_reflns_limit_k_max        12
_diffrn_reflns_limit_l_min        -14
_diffrn_reflns_limit_l_max        14
_diffrn_reflns_theta_min          3.40
_diffrn_reflns_theta_max          22.78
_reflns_number_total              3976
_reflns_number_gt                 2685
_reflns_threshold_expression      >2\s(I)
 
_computing_data_collection        'KappaCCD Reference Manual (Nonius, 1998)'
_computing_cell_refinement        'DENZO-SMN (Otwinowski & Minor, 1997)'
_computing_data_reduction         'DENZO-SMN (Otwinowski & Minor, 1997)'
_computing_structure_solution     'SHELXS-97 (Sheldrick, 1997)'
_computing_structure_refinement   'SHELXL-97 (Sheldrick, 1997)'
_computing_molecular_graphics     'ORTEP-3 for Windows version 2.02 (Farrugia, 2008)'
_computing_publication_material   'WinGX publication routines (Farrugia, 1999)'
 
_refine_special_details
;
 Refinement of F^2^ against ALL reflections.  The weighted R-factor wR and
 goodness of fit S are based on F^2^, conventional R-factors R are based
 on F, with F set to zero for negative F^2^. The threshold expression of
 F^2^ > 2\s(F^2^) is used only for calculating R-factors(gt) etc. and is
 not relevant to the choice of reflections for refinement.  R-factors based
 on F^2^ are statistically about twice as large as those based on F, and R-
 factors based on ALL data will be even larger.
;
 
_refine_ls_structure_factor_coef  Fsqd
_refine_ls_matrix_type            full
_refine_ls_weighting_scheme       calc
_refine_ls_weighting_details
 'calc w=1/[\s^2^(Fo^2^)+(0.0894P)^2^+0.1498P] where P=(Fo^2^+2Fc^2^)/3'
_atom_sites_solution_primary      direct
_atom_sites_solution_secondary    difmap
_atom_sites_solution_hydrogens    geom
_refine_ls_hydrogen_treatment     constr
_refine_ls_extinction_method      none
_refine_ls_extinction_coef        ?
_refine_ls_number_reflns          3976
_refine_ls_number_parameters      402
_refine_ls_number_restraints      38
_refine_ls_R_factor_all           0.0926
_refine_ls_R_factor_gt            0.0576
_refine_ls_wR_factor_ref          0.1650
_refine_ls_wR_factor_gt           0.1418
_refine_ls_goodness_of_fit_ref    1.040
_refine_ls_restrained_S_all       1.037
_refine_ls_shift/su_max           0.000
_refine_ls_shift/su_mean          0.000
 
loop_
 _atom_site_label
 _atom_site_type_symbol
 _atom_site_fract_x
 _atom_site_fract_y
 _atom_site_fract_z
 _atom_site_U_iso_or_equiv
 _atom_site_adp_type
 _atom_site_occupancy
 _atom_site_symmetry_multiplicity
 _atom_site_calc_flag
 _atom_site_refinement_flags
 _atom_site_disorder_assembly
 _atom_site_disorder_group
N1 N -0.0394(2) 0.8237(2) 0.15224(18) 0.0484(6) Uani 1 1 d . A .
H29 H 0.0091 0.7708 0.1338 0.073 Uiso 1 1 calc R . .
O1 O 0.0081(2) 0.9289(2) 0.37161(16) 0.0692(7) Uani 1 1 d . . .
O2 O -0.0807(2) 0.7666(2) 0.37400(17) 0.0644(6) Uani 1 1 d . . .
O3 O 0.1919(2) 0.9108(2) 0.10471(17) 0.0667(7) Uani 1 1 d . . .
O4 O 0.0790(3) 1.3118(3) 0.1620(3) 0.1059(10) Uani 1 1 d . . .
O5 O -0.2335(2) 0.9185(2) 0.14941(19) 0.0674(7) Uani 1 1 d . A .
C1 C 0.1508(3) 0.8702(3) 0.2142(2) 0.0539(8) Uani 1 1 d . A .
H1 H 0.1785 0.7760 0.2568 0.065 Uiso 1 1 calc R . .
C2 C 0.1943(3) 0.9451(4) 0.2764(3) 0.0690(10) Uani 1 1 d . . .
H2A H 0.2390 0.8833 0.3456 0.083 Uiso 1 1 calc R A .
H2B H 0.2491 1.0025 0.2313 0.083 Uiso 1 1 calc R . .
C3 C 0.0868(4) 1.0263(3) 0.3022(3) 0.0641(10) Uani 1 1 d . A .
C4 C 0.0123(3) 1.1128(3) 0.1940(2) 0.0538(8) Uani 1 1 d . . .
C5 C -0.0269(3) 1.0432(3) 0.1443(2) 0.0464(7) Uani 1 1 d . A .
H5 H -0.0740 1.0825 0.0772 0.056 Uiso 1 1 calc R . .
C6 C 0.0097(3) 0.8980(3) 0.2036(2) 0.0457(7) Uani 1 1 d . . .
C7 C -0.0271(3) 0.8570(3) 0.3233(2) 0.0531(8) Uani 1 1 d . A .
C8 C 0.1208(5) 1.0884(5) 0.3775(3) 0.0995(15) Uani 1 1 d . . .
H8A H 0.1795 1.1451 0.3431 0.149 Uiso 1 1 calc R A .
H8B H 0.1553 1.0210 0.4479 0.149 Uiso 1 1 calc R . .
H8C H 0.0492 1.1385 0.3892 0.149 Uiso 1 1 calc R . .
C9A C 0.2954(8) 0.8281(7) 0.0909(6) 0.078(2) Uani 0.805(19) 1 d PU A 1
H9A H 0.2987 0.8462 0.0125 0.094 Uiso 0.805(19) 1 calc PR A 1
H9B H 0.2849 0.7372 0.1314 0.094 Uiso 0.805(19) 1 calc PR A 1
C9B C 0.324(3) 0.878(3) 0.115(2) 0.071(9) Uani 0.195(19) 1 d PU A 2
H9C H 0.3605 0.9566 0.0741 0.085 Uiso 0.195(19) 1 calc PR A 2
H9D H 0.3540 0.8414 0.1923 0.085 Uiso 0.195(19) 1 calc PR A 2
C10A C 0.4114(9) 0.8473(8) 0.1307(7) 0.124(3) Uani 0.805(19) 1 d PU A 1
H10A H 0.4238 0.9363 0.0889 0.185 Uiso 0.805(19) 1 calc PR A 1
H10B H 0.4772 0.7890 0.1207 0.185 Uiso 0.805(19) 1 calc PR A 1
H10C H 0.4089 0.8290 0.2083 0.185 Uiso 0.805(19) 1 calc PR A 1
C10B C 0.357(4) 0.784(4) 0.068(3) 0.133(13) Uani 0.195(19) 1 d PU A 2
H10D H 0.3076 0.7157 0.0983 0.200 Uiso 0.195(19) 1 calc PR A 2
H10E H 0.4412 0.7472 0.0869 0.200 Uiso 0.195(19) 1 calc PR A 2
H10F H 0.3422 0.8270 -0.0115 0.200 Uiso 0.195(19) 1 calc PR A 2
C11 C 0.0018(4) 1.2581(4) 0.1409(3) 0.0678(10) Uani 1 1 d . A .
C12 C -0.1037(4) 1.3351(4) 0.0581(4) 0.0839(12) Uani 1 1 d . . .
H12A H -0.1783 1.3264 0.0956 0.126 Uiso 1 1 calc R A .
H12B H -0.1063 1.3023 0.0020 0.126 Uiso 1 1 calc R . .
H12C H -0.0942 1.4259 0.0236 0.126 Uiso 1 1 calc R . .
C13 C -0.1621(3) 0.8370(3) 0.1328(2) 0.0535(8) Uani 1 1 d . . .
C14 C -0.2013(4) 0.7477(4) 0.0871(3) 0.0787(11) Uani 1 1 d . A .
H14A H -0.2750 0.7183 0.1197 0.118 Uiso 1 1 calc R . .
H14B H -0.1384 0.6734 0.1045 0.118 Uiso 1 1 calc R . .
H14C H -0.2159 0.7939 0.0076 0.118 Uiso 1 1 calc R . .
N2 N 0.1715(2) 0.3926(2) 0.4133(2) 0.0481(6) Uani 1 1 d . . .
H30 H 0.1507 0.3377 0.4760 0.072 Uiso 1 1 calc R . .
O6 O 0.4569(2) 0.5227(2) 0.3541(2) 0.0707(7) Uani 1 1 d . . .
O7 O 0.2860(2) 0.5993(2) 0.4078(2) 0.0716(7) Uani 1 1 d . . .
O8 O 0.3457(2) 0.1618(2) 0.50883(19) 0.0663(6) Uani 1 1 d . B .
O9 O 0.5957(3) 0.3611(5) 0.1427(3) 0.1330(14) Uani 1 1 d . . .
O10 O 0.11044(19) 0.5625(2) 0.24739(17) 0.0545(6) Uani 1 1 d . . .
C15 C 0.3803(3) 0.2827(3) 0.4906(3) 0.0540(8) Uani 1 1 d . . .
H15 H 0.3679 0.2981 0.5578 0.065 Uiso 1 1 calc R . .
C16 C 0.5137(3) 0.2911(4) 0.4609(3) 0.0642(9) Uani 1 1 d . . .
H16A H 0.5519 0.2087 0.4610 0.077 Uiso 1 1 calc R . .
H16B H 0.5578 0.3059 0.5167 0.077 Uiso 1 1 calc R . .
C17 C 0.5207(3) 0.4036(4) 0.3450(3) 0.0664(10) Uani 1 1 d . . .
C18 C 0.4444(3) 0.3812(3) 0.2607(3) 0.0563(8) Uani 1 1 d . . .
C19 C 0.3293(3) 0.3759(3) 0.2871(2) 0.0487(8) Uani 1 1 d . . .
H19 H 0.2715 0.3631 0.2434 0.058 Uiso 1 1 calc R . .
C20 C 0.2979(3) 0.3921(3) 0.3922(2) 0.0460(7) Uani 1 1 d . . .
C21 C 0.3426(3) 0.5160(3) 0.3847(3) 0.0570(8) Uani 1 1 d . . .
C22 C 0.6501(4) 0.4281(5) 0.3205(4) 0.1006(15) Uani 1 1 d . . .
H22A H 0.6504 0.4993 0.2483 0.151 Uiso 1 1 calc R . .
H22B H 0.6986 0.3505 0.3215 0.151 Uiso 1 1 calc R . .
H22C H 0.6834 0.4501 0.3762 0.151 Uiso 1 1 calc R . .
C23 C 0.3659(6) 0.0669(5) 0.6207(4) 0.1114(17) Uani 1 1 d . . .
H23A H 0.3302 0.1088 0.6668 0.134 Uiso 0.444(11) 1 calc PR B 1
H23B H 0.3183 -0.0011 0.6281 0.134 Uiso 0.444(11) 1 calc PR B 1
H23C H 0.4536 0.0461 0.6373 0.134 Uiso 0.556(11) 1 d PR B 2
H23D H 0.3332 0.1098 0.6670 0.134 Uiso 0.556(11) 1 d PR B 2
C24A C 0.4745(9) 0.0074(10) 0.6664(8) 0.092(4) Uani 0.444(11) 1 d P B 1
H24A H 0.4675 -0.0591 0.7397 0.138 Uiso 0.444(11) 1 calc PR B 1
H24B H 0.5210 0.0698 0.6716 0.138 Uiso 0.444(11) 1 calc PR B 1
H24C H 0.5149 -0.0324 0.6215 0.138 Uiso 0.444(11) 1 calc PR B 1
C24B C 0.3245(10) -0.0448(8) 0.6561(8) 0.112(4) Uani 0.556(11) 1 d P B 2
H24D H 0.3443 -0.0848 0.6057 0.169 Uiso 0.556(11) 1 calc PR B 2
H24E H 0.2375 -0.0296 0.6594 0.169 Uiso 0.556(11) 1 calc PR B 2
H24F H 0.3612 -0.1021 0.7291 0.169 Uiso 0.556(11) 1 calc PR B 2
C25 C 0.4909(4) 0.3601(4) 0.1641(3) 0.0747(11) Uani 1 1 d . . .
C26 C 0.4043(4) 0.3385(6) 0.0904(4) 0.1059(16) Uani 1 1 d . . .
H26A H 0.3489 0.4183 0.0499 0.159 Uiso 1 1 calc R . .
H26B H 0.3592 0.2708 0.1348 0.159 Uiso 1 1 calc R . .
H26C H 0.4489 0.3126 0.0387 0.159 Uiso 1 1 calc R . .
C27 C 0.0840(3) 0.4781(3) 0.3362(3) 0.0474(7) Uani 1 1 d . . .
C28 C -0.0446(3) 0.4633(4) 0.3654(3) 0.0649(9) Uani 1 1 d . . .
H28A H -0.0852 0.5421 0.3685 0.097 Uiso 1 1 calc R . .
H28B H -0.0450 0.3907 0.4367 0.097 Uiso 1 1 calc R . .
H28C H -0.0861 0.4476 0.3097 0.097 Uiso 1 1 calc R . .
 
loop_
 _atom_site_aniso_label
 _atom_site_aniso_U_11
 _atom_site_aniso_U_22
 _atom_site_aniso_U_33
 _atom_site_aniso_U_23
 _atom_site_aniso_U_13
 _atom_site_aniso_U_12
N1 0.0541(18) 0.0510(15) 0.0430(14) -0.0214(13) 0.0092(12) -0.0123(12)
O1 0.100(2) 0.0745(16) 0.0375(12) -0.0204(12) 0.0130(11) -0.0364(14)
O2 0.0762(17) 0.0597(14) 0.0467(12) -0.0077(11) 0.0190(11) -0.0247(13)
O3 0.0527(16) 0.0709(15) 0.0571(14) -0.0100(12) 0.0158(11) -0.0043(12)
O4 0.131(3) 0.0760(18) 0.115(2) -0.0341(18) -0.013(2) -0.0464(19)
O5 0.0561(15) 0.0737(16) 0.0652(15) -0.0215(13) 0.0105(11) -0.0127(13)
C1 0.051(2) 0.0503(18) 0.0477(18) -0.0068(15) 0.0035(14) -0.0108(15)
C2 0.063(2) 0.071(2) 0.059(2) -0.0105(19) -0.0104(17) -0.0202(19)
C3 0.082(3) 0.067(2) 0.0453(19) -0.0192(18) 0.0037(17) -0.032(2)
C4 0.063(2) 0.054(2) 0.0473(18) -0.0221(17) 0.0123(15) -0.0188(16)
C5 0.0475(19) 0.0497(18) 0.0368(15) -0.0118(15) 0.0105(13) -0.0117(14)
C6 0.051(2) 0.0437(17) 0.0385(16) -0.0115(14) 0.0073(13) -0.0140(14)
C7 0.060(2) 0.057(2) 0.0365(16) -0.0122(16) 0.0053(14) -0.0133(17)
C8 0.146(4) 0.104(3) 0.065(2) -0.040(2) -0.003(2) -0.057(3)
C9A 0.056(5) 0.086(5) 0.078(4) -0.021(3) 0.016(3) -0.009(3)
C9B 0.021(17) 0.106(18) 0.093(15) -0.042(12) 0.003(10) -0.028(12)
C10A 0.053(6) 0.159(7) 0.156(7) -0.066(5) 0.005(4) -0.010(4)
C10B 0.10(3) 0.20(3) 0.12(2) -0.109(19) -0.018(17) 0.02(2)
C11 0.083(3) 0.057(2) 0.068(2) -0.029(2) 0.010(2) -0.019(2)
C12 0.084(3) 0.058(2) 0.098(3) -0.021(2) 0.011(2) -0.011(2)
C13 0.059(2) 0.054(2) 0.0405(17) -0.0106(16) 0.0094(15) -0.0181(17)
C14 0.085(3) 0.086(3) 0.071(2) -0.031(2) 0.006(2) -0.040(2)
N2 0.0418(16) 0.0480(15) 0.0453(14) -0.0099(12) 0.0068(12) -0.0094(12)
O6 0.0609(17) 0.0670(16) 0.0830(17) -0.0240(14) 0.0019(13) -0.0307(13)
O7 0.0831(19) 0.0556(14) 0.0752(16) -0.0277(14) -0.0178(13) -0.0071(13)
O8 0.0664(16) 0.0490(13) 0.0657(15) -0.0057(12) -0.0023(11) -0.0121(11)
O9 0.069(2) 0.233(4) 0.113(3) -0.087(3) 0.0393(19) -0.030(2)
O10 0.0535(14) 0.0510(13) 0.0476(12) -0.0087(11) 0.0028(10) -0.0105(10)
C15 0.051(2) 0.054(2) 0.0517(18) -0.0174(16) -0.0002(15) -0.0078(15)
C16 0.048(2) 0.075(2) 0.064(2) -0.0245(19) -0.0106(16) -0.0081(17)
C17 0.046(2) 0.076(2) 0.072(2) -0.023(2) 0.0063(17) -0.0205(18)
C18 0.047(2) 0.064(2) 0.0522(18) -0.0169(17) 0.0080(15) -0.0154(16)
C19 0.045(2) 0.0459(17) 0.0477(17) -0.0109(15) 0.0009(14) -0.0122(14)
C20 0.0433(19) 0.0465(17) 0.0451(16) -0.0155(14) 0.0018(13) -0.0095(14)
C21 0.062(2) 0.052(2) 0.0512(19) -0.0146(17) -0.0071(16) -0.0135(17)
C22 0.052(3) 0.140(4) 0.109(3) -0.042(3) 0.010(2) -0.044(3)
C23 0.135(5) 0.070(3) 0.079(3) 0.011(3) 0.028(3) 0.003(3)
C24A 0.075(8) 0.083(7) 0.085(7) -0.009(6) -0.024(5) 0.012(6)
C24B 0.149(9) 0.059(6) 0.106(7) -0.015(5) 0.026(6) -0.008(5)
C25 0.056(3) 0.091(3) 0.065(2) -0.021(2) 0.0174(19) -0.011(2)
C26 0.097(4) 0.162(5) 0.080(3) -0.070(3) 0.018(3) -0.023(3)
C27 0.046(2) 0.0447(18) 0.0504(19) -0.0187(17) 0.0037(15) -0.0077(15)
C28 0.047(2) 0.069(2) 0.071(2) -0.0210(19) 0.0049(17) -0.0129(17)
 
_geom_special_details
;
 All s.u.'s (except the s.u. in the dihedral angle between two l.s. planes)
 are estimated using the full covariance matrix.  The cell s.u.'s are taken
 into account individually in the estimation of s.u.'s in distances, angles
 and torsion angles; correlations between s.u.'s in cell parameters are only
 used when they are defined by crystal symmetry.  An approximate (isotropic)
 treatment of cell s.u.'s is used for estimating s.u.'s involving l.s. planes.
;
 
loop_
 _geom_bond_atom_site_label_1
 _geom_bond_atom_site_label_2
 _geom_bond_distance
 _geom_bond_site_symmetry_2
 _geom_bond_publ_flag
N1 C13 1.361(4) . ?
N1 C6 1.442(4) . ?
N1 H29 0.8600 . ?
O1 C7 1.325(4) . ?
O1 C3 1.503(4) . ?
O2 C7 1.208(4) . ?
O3 C1 1.420(3) . ?
O3 C9A 1.437(9) . ?
O3 C9B 1.46(3) . ?
O4 C11 1.216(4) . ?
O5 C13 1.221(4) . ?
C1 C2 1.528(5) . ?
C1 C6 1.548(4) . ?
C1 H1 0.9800 . ?
C2 C3 1.528(5) . ?
C2 H2A 0.9700 . ?
C2 H2B 0.9700 . ?
C3 C4 1.515(5) . ?
C3 C8 1.515(5) . ?
C4 C5 1.334(4) . ?
C4 C11 1.486(5) . ?
C5 C6 1.493(4) . ?
C5 H5 0.9300 . ?
C6 C7 1.524(4) . ?
C8 H8A 0.9600 . ?
C8 H8B 0.9600 . ?
C8 H8C 0.9600 . ?
C9A C10A 1.470(15) . ?
C9A H9A 0.9700 . ?
C9A H9B 0.9700 . ?
C9B C10B 1.44(6) . ?
C9B H9C 0.9700 . ?
C9B H9D 0.9700 . ?
C10A H10A 0.9600 . ?
C10A H10B 0.9600 . ?
C10A H10C 0.9600 . ?
C10B H10D 0.9600 . ?
C10B H10E 0.9600 . ?
C10B H10F 0.9600 . ?
C11 C12 1.500(6) . ?
C12 H12A 0.9600 . ?
C12 H12B 0.9600 . ?
C12 H12C 0.9600 . ?
C13 C14 1.492(5) . ?
C14 H14A 0.9600 . ?
C14 H14B 0.9600 . ?
C14 H14C 0.9600 . ?
N2 C27 1.353(4) . ?
N2 C20 1.429(4) . ?
N2 H30 0.8600 . ?
O6 C21 1.334(4) . ?
O6 C17 1.485(4) . ?
O7 C21 1.206(4) . ?
O8 C15 1.403(4) . ?
O8 C23 1.415(5) . ?
O9 C25 1.197(4) . ?
O10 C27 1.235(3) . ?
C15 C16 1.537(4) . ?
C15 C20 1.550(4) . ?
C15 H15 0.9800 . ?
C16 C17 1.543(5) . ?
C16 H16A 0.9700 . ?
C16 H16B 0.9700 . ?
C17 C22 1.512(5) . ?
C17 C18 1.525(5) . ?
C18 C19 1.327(4) . ?
C18 C25 1.474(5) . ?
C19 C20 1.510(4) . ?
C19 H19 0.9300 . ?
C20 C21 1.524(4) . ?
C22 H22A 0.9600 . ?
C22 H22B 0.9600 . ?
C22 H22C 0.9600 . ?
C23 C24A 1.304(10) . ?
C23 C24B 1.309(9) . ?
C23 H23A 0.9700 . ?
C23 H23B 0.9700 . ?
C23 H23C 0.9700 . ?
C23 H23D 0.9700 . ?
C24A H23C 0.4749 . ?
C24A H24A 0.9600 . ?
C24A H24B 0.9600 . ?
C24A H24C 0.9600 . ?
C24B H24D 0.9600 . ?
C24B H24E 0.9600 . ?
C24B H24F 0.9600 . ?
C25 C26 1.484(6) . ?
C26 H26A 0.9600 . ?
C26 H26B 0.9600 . ?
C26 H26C 0.9600 . ?
C27 C28 1.492(4) . ?
C28 H28A 0.9600 . ?
C28 H28B 0.9600 . ?
C28 H28C 0.9600 . ?
 
loop_
 _geom_angle_atom_site_label_1
 _geom_angle_atom_site_label_2
 _geom_angle_atom_site_label_3
 _geom_angle
 _geom_angle_site_symmetry_1
 _geom_angle_site_symmetry_3
 _geom_angle_publ_flag
C13 N1 C6 120.4(3) . . ?
C13 N1 H29 119.8 . . ?
C6 N1 H29 119.8 . . ?
C7 O1 C3 113.9(2) . . ?
C1 O3 C9A 116.1(3) . . ?
C1 O3 C9B 107.7(11) . . ?
C9A O3 C9B 34.4(11) . . ?
O3 C1 C2 112.9(3) . . ?
O3 C1 C6 107.5(2) . . ?
C2 C1 C6 107.6(3) . . ?
O3 C1 H1 109.6 . . ?
C2 C1 H1 109.6 . . ?
C6 C1 H1 109.6 . . ?
C3 C2 C1 111.2(3) . . ?
C3 C2 H2A 109.4 . . ?
C1 C2 H2A 109.4 . . ?
C3 C2 H2B 109.4 . . ?
C1 C2 H2B 109.4 . . ?
H2A C2 H2B 108.0 . . ?
O1 C3 C4 106.1(3) . . ?
O1 C3 C8 103.6(3) . . ?
C4 C3 C8 118.3(3) . . ?
O1 C3 C2 105.1(3) . . ?
C4 C3 C2 108.2(3) . . ?
C8 C3 C2 114.3(3) . . ?
C5 C4 C11 123.9(3) . . ?
C5 C4 C3 112.1(3) . . ?
C11 C4 C3 123.4(3) . . ?
C4 C5 C6 115.7(3) . . ?
C4 C5 H5 122.1 . . ?
C6 C5 H5 122.1 . . ?
N1 C6 C5 115.0(2) . . ?
N1 C6 C7 111.3(2) . . ?
C5 C6 C7 107.1(2) . . ?
N1 C6 C1 111.3(2) . . ?
C5 C6 C1 107.1(2) . . ?
C7 C6 C1 104.4(2) . . ?
O2 C7 O1 120.7(3) . . ?
O2 C7 C6 125.6(3) . . ?
O1 C7 C6 113.7(3) . . ?
C3 C8 H8A 109.5 . . ?
C3 C8 H8B 109.5 . . ?
H8A C8 H8B 109.5 . . ?
C3 C8 H8C 109.5 . . ?
H8A C8 H8C 109.5 . . ?
H8B C8 H8C 109.5 . . ?
O3 C9A C10A 112.8(8) . . ?
O3 C9A H9A 109.0 . . ?
C10A C9A H9A 109.0 . . ?
O3 C9A H9B 109.0 . . ?
C10A C9A H9B 109.0 . . ?
H9A C9A H9B 107.8 . . ?
C10B C9B O3 107(3) . . ?
C10B C9B H9C 110.2 . . ?
O3 C9B H9C 110.2 . . ?
C10B C9B H9D 110.2 . . ?
O3 C9B H9D 110.2 . . ?
H9C C9B H9D 108.5 . . ?
C9B C10B H10D 109.5 . . ?
C9B C10B H10E 109.5 . . ?
H10D C10B H10E 109.5 . . ?
C9B C10B H10F 109.5 . . ?
H10D C10B H10F 109.5 . . ?
H10E C10B H10F 109.5 . . ?
O4 C11 C4 120.6(4) . . ?
O4 C11 C12 121.4(3) . . ?
C4 C11 C12 118.0(3) . . ?
C11 C12 H12A 109.5 . . ?
C11 C12 H12B 109.5 . . ?
H12A C12 H12B 109.5 . . ?
C11 C12 H12C 109.5 . . ?
H12A C12 H12C 109.5 . . ?
H12B C12 H12C 109.5 . . ?
O5 C13 N1 121.9(3) . . ?
O5 C13 C14 123.1(3) . . ?
N1 C13 C14 115.0(3) . . ?
C13 C14 H14A 109.5 . . ?
C13 C14 H14B 109.5 . . ?
H14A C14 H14B 109.5 . . ?
C13 C14 H14C 109.5 . . ?
H14A C14 H14C 109.5 . . ?
H14B C14 H14C 109.5 . . ?
C27 N2 C20 121.2(2) . . ?
C27 N2 H30 119.4 . . ?
C20 N2 H30 119.4 . . ?
C21 O6 C17 114.6(2) . . ?
C15 O8 C23 114.1(3) . . ?
O8 C15 C16 113.4(3) . . ?
O8 C15 C20 108.4(2) . . ?
C16 C15 C20 107.9(2) . . ?
O8 C15 H15 109.0 . . ?
C16 C15 H15 109.0 . . ?
C20 C15 H15 109.0 . . ?
C15 C16 C17 110.7(3) . . ?
C15 C16 H16A 109.5 . . ?
C17 C16 H16A 109.5 . . ?
C15 C16 H16B 109.5 . . ?
C17 C16 H16B 109.5 . . ?
H16A C16 H16B 108.1 . . ?
O6 C17 C22 105.3(3) . . ?
O6 C17 C18 106.9(3) . . ?
C22 C17 C18 118.8(3) . . ?
O6 C17 C16 104.6(3) . . ?
C22 C17 C16 112.0(3) . . ?
C18 C17 C16 108.0(3) . . ?
C19 C18 C25 122.5(3) . . ?
C19 C18 C17 111.9(3) . . ?
C25 C18 C17 125.5(3) . . ?
C18 C19 C20 115.9(3) . . ?
C18 C19 H19 122.0 . . ?
C20 C19 H19 122.0 . . ?
N2 C20 C19 113.5(2) . . ?
N2 C20 C21 112.6(3) . . ?
C19 C20 C21 107.7(2) . . ?
N2 C20 C15 111.8(2) . . ?
C19 C20 C15 108.1(2) . . ?
C21 C20 C15 102.5(2) . . ?
O7 C21 O6 121.1(3) . . ?
O7 C21 C20 125.7(3) . . ?
O6 C21 C20 113.2(3) . . ?
C17 C22 H22A 109.5 . . ?
C17 C22 H22B 109.5 . . ?
H22A C22 H22B 109.5 . . ?
C17 C22 H22C 109.5 . . ?
H22A C22 H22C 109.5 . . ?
H22B C22 H22C 109.5 . . ?
C24A C23 C24B 91.4(7) . . ?
C24A C23 O8 122.8(6) . . ?
C24B C23 O8 122.4(7) . . ?
C24A C23 H23A 106.6 . . ?
C24B C23 H23A 104.9 . . ?
O8 C23 H23A 106.6 . . ?
C24A C23 H23B 106.6 . . ?
C24B C23 H23B 17.0 . . ?
O8 C23 H23B 106.6 . . ?
H23A C23 H23B 106.6 . . ?
C24A C23 H23C 17.2 . . ?
C24B C23 H23C 106.9 . . ?
O8 C23 H23C 106.8 . . ?
H23A C23 H23C 108.6 . . ?
H23B C23 H23C 120.8 . . ?
C24A C23 H23D 105.0 . . ?
C24B C23 H23D 106.5 . . ?
O8 C23 H23D 106.7 . . ?
H23A C23 H23D 2.2 . . ?
H23B C23 H23D 108.6 . . ?
H23C C23 H23D 106.6 . . ?
C23 C24A H23C 37.3 . . ?
C23 C24A H24A 109.5 . . ?
H23C C24A H24A 143.9 . . ?
C23 C24A H24B 109.5 . . ?
H23C C24A H24B 80.8 . . ?
C23 C24A H24C 109.5 . . ?
H23C C24A H24C 98.4 . . ?
C23 C24B H24D 109.5 . . ?
C23 C24B H24E 109.5 . . ?
H24D C24B H24E 109.5 . . ?
C23 C24B H24F 109.5 . . ?
H24D C24B H24F 109.5 . . ?
H24E C24B H24F 109.5 . . ?
O9 C25 C18 122.1(4) . . ?
O9 C25 C26 119.1(4) . . ?
C18 C25 C26 118.7(3) . . ?
C25 C26 H26A 109.5 . . ?
C25 C26 H26B 109.5 . . ?
H26A C26 H26B 109.5 . . ?
C25 C26 H26C 109.5 . . ?
H26A C26 H26C 109.5 . . ?
H26B C26 H26C 109.5 . . ?
O10 C27 N2 121.3(3) . . ?
O10 C27 C28 122.8(3) . . ?
N2 C27 C28 116.0(3) . . ?
C27 C28 H28A 109.5 . . ?
C27 C28 H28B 109.5 . . ?
H28A C28 H28B 109.5 . . ?
C27 C28 H28C 109.5 . . ?
H28A C28 H28C 109.5 . . ?
H28B C28 H28C 109.5 . . ?
 
loop_
 _geom_torsion_atom_site_label_1
 _geom_torsion_atom_site_label_2
 _geom_torsion_atom_site_label_3
 _geom_torsion_atom_site_label_4
 _geom_torsion
 _geom_torsion_site_symmetry_1
 _geom_torsion_site_symmetry_2
 _geom_torsion_site_symmetry_3
 _geom_torsion_site_symmetry_4
 _geom_torsion_publ_flag
C9A O3 C1 C2 100.4(5) . . . . ?
C9B O3 C1 C2 64.4(15) . . . . ?
C9A O3 C1 C6 -141.0(5) . . . . ?
C9B O3 C1 C6 -177.0(15) . . . . ?
O3 C1 C2 C3 115.8(3) . . . . ?
C6 C1 C2 C3 -2.7(3) . . . . ?
C7 O1 C3 C4 58.2(4) . . . . ?
C7 O1 C3 C8 -176.5(3) . . . . ?
C7 O1 C3 C2 -56.3(3) . . . . ?
C1 C2 C3 O1 59.0(3) . . . . ?
C1 C2 C3 C4 -54.0(3) . . . . ?
C1 C2 C3 C8 172.0(3) . . . . ?
O1 C3 C4 C5 -54.7(3) . . . . ?
C8 C3 C4 C5 -170.4(3) . . . . ?
C2 C3 C4 C5 57.7(4) . . . . ?
O1 C3 C4 C11 134.7(3) . . . . ?
C8 C3 C4 C11 19.0(5) . . . . ?
C2 C3 C4 C11 -112.9(3) . . . . ?
C11 C4 C5 C6 170.5(3) . . . . ?
C3 C4 C5 C6 -0.1(4) . . . . ?
C13 N1 C6 C5 -56.4(3) . . . . ?
C13 N1 C6 C7 65.7(3) . . . . ?
C13 N1 C6 C1 -178.3(2) . . . . ?
C4 C5 C6 N1 176.5(3) . . . . ?
C4 C5 C6 C7 52.2(3) . . . . ?
C4 C5 C6 C1 -59.3(3) . . . . ?
O3 C1 C6 N1 61.9(3) . . . . ?
C2 C1 C6 N1 -176.1(2) . . . . ?
O3 C1 C6 C5 -64.5(3) . . . . ?
C2 C1 C6 C5 57.4(3) . . . . ?
O3 C1 C6 C7 -177.9(2) . . . . ?
C2 C1 C6 C7 -55.9(3) . . . . ?
C3 O1 C7 O2 172.8(3) . . . . ?
C3 O1 C7 C6 -5.6(4) . . . . ?
N1 C6 C7 O2 6.4(5) . . . . ?
C5 C6 C7 O2 132.8(3) . . . . ?
C1 C6 C7 O2 -113.8(4) . . . . ?
N1 C6 C7 O1 -175.3(3) . . . . ?
C5 C6 C7 O1 -48.8(4) . . . . ?
C1 C6 C7 O1 64.5(3) . . . . ?
C1 O3 C9A C10A -77.9(6) . . . . ?
C9B O3 C9A C10A 5.4(19) . . . . ?
C1 O3 C9B C10B 117(2) . . . . ?
C9A O3 C9B C10B 6.6(17) . . . . ?
C5 C4 C11 O4 -147.3(4) . . . . ?
C3 C4 C11 O4 22.2(5) . . . . ?
C5 C4 C11 C12 30.5(5) . . . . ?
C3 C4 C11 C12 -160.0(3) . . . . ?
C6 N1 C13 O5 5.9(4) . . . . ?
C6 N1 C13 C14 -175.7(3) . . . . ?
C23 O8 C15 C16 89.5(4) . . . . ?
C23 O8 C15 C20 -150.7(3) . . . . ?
O8 C15 C16 C17 120.0(3) . . . . ?
C20 C15 C16 C17 -0.1(4) . . . . ?
C21 O6 C17 C22 -174.8(3) . . . . ?
C21 O6 C17 C18 57.9(3) . . . . ?
C21 O6 C17 C16 -56.6(3) . . . . ?
C15 C16 C17 O6 57.7(3) . . . . ?
C15 C16 C17 C22 171.3(3) . . . . ?
C15 C16 C17 C18 -56.0(4) . . . . ?
O6 C17 C18 C19 -53.9(3) . . . . ?
C22 C17 C18 C19 -172.8(4) . . . . ?
C16 C17 C18 C19 58.2(4) . . . . ?
O6 C17 C18 C25 129.2(3) . . . . ?
C22 C17 C18 C25 10.3(6) . . . . ?
C16 C17 C18 C25 -118.7(4) . . . . ?
C25 C18 C19 C20 176.7(3) . . . . ?
C17 C18 C19 C20 -0.3(4) . . . . ?
C27 N2 C20 C19 -55.3(3) . . . . ?
C27 N2 C20 C21 67.3(3) . . . . ?
C27 N2 C20 C15 -177.9(2) . . . . ?
C18 C19 C20 N2 176.9(3) . . . . ?
C18 C19 C20 C21 51.5(4) . . . . ?
C18 C19 C20 C15 -58.5(3) . . . . ?
O8 C15 C20 N2 57.4(3) . . . . ?
C16 C15 C20 N2 -179.3(2) . . . . ?
O8 C15 C20 C19 -68.2(3) . . . . ?
C16 C15 C20 C19 55.1(3) . . . . ?
O8 C15 C20 C21 178.3(3) . . . . ?
C16 C15 C20 C21 -58.5(3) . . . . ?
C17 O6 C21 O7 171.2(3) . . . . ?
C17 O6 C21 C20 -5.9(4) . . . . ?
N2 C20 C21 O7 9.4(4) . . . . ?
C19 C20 C21 O7 135.3(3) . . . . ?
C15 C20 C21 O7 -110.9(3) . . . . ?
N2 C20 C21 O6 -173.7(3) . . . . ?
C19 C20 C21 O6 -47.8(3) . . . . ?
C15 C20 C21 O6 66.0(3) . . . . ?
C15 O8 C23 C24A -73.1(8) . . . . ?
C15 O8 C23 C24B 170.6(6) . . . . ?
C19 C18 C25 O9 -177.7(4) . . . . ?
C17 C18 C25 O9 -1.2(6) . . . . ?
C19 C18 C25 C26 2.9(6) . . . . ?
C17 C18 C25 C26 179.5(4) . . . . ?
C20 N2 C27 O10 -3.5(4) . . . . ?
C20 N2 C27 C28 176.4(3) . . . . ?
 
loop_
 _geom_hbond_atom_site_label_D
 _geom_hbond_atom_site_label_H
 _geom_hbond_atom_site_label_A
 _geom_hbond_distance_DH
 _geom_hbond_distance_HA
 _geom_hbond_distance_DA
 _geom_hbond_angle_DHA
 _geom_hbond_site_symmetry_A
N1 H29 O10  0.86 2.32 2.937(3) 128.7 .
N2 H30 O2  0.86 2.06 2.909(3) 170.1 2_566
 
_diffrn_measured_fraction_theta_max    0.980
_diffrn_reflns_theta_full              22.78
_diffrn_measured_fraction_theta_full   0.980
_refine_diff_density_max    0.180
_refine_diff_density_min   -0.191
_refine_diff_density_rms    0.046
