# Supplementary material
Source: MDPI journal article supplement (https://www.mdpi.com/2073-8994/12/10/1714)
Supplement: s1 [file s1 › endo-3c.cif]

data_endo-3c

_publ_contact_author_name 'Franc Perdih'
_publ_contact_author_address
;
Faculty of Chemistry and Chemical Technology
University of Ljubljana
Ve\<cna pot 113, P. O. Box 537
SI-1000 Ljubljana
Slovenia
;

_publ_contact_author_email franc.perdih@fkkt.uni-lj.si

loop_
_publ_author_name
_publ_author_address

'Kri\<stof Kranjc'
;
Faculty of Chemistry and Chemical Technology
University of Ljubljana
Ve\<cna pot 113, P. O. Box 537
SI-1000 Ljubljana
Slovenia
;

'Amadej Juranovi\<c'
;
Faculty of Chemistry and Chemical Technology
University of Ljubljana
Ve\<cna pot 113, P. O. Box 537
SI-1000 Ljubljana
Slovenia
;

'Marijan Ko\<cevar'
;
Faculty of Chemistry and Chemical Technology
University of Ljubljana
Ve\<cna pot 113, P. O. Box 537
SI-1000 Ljubljana
Slovenia
;

'Franc Perdih'
;
Faculty of Chemistry and Chemical Technology
University of Ljubljana
Ve\<cna pot 113, P. O. Box 537
SI-1000 Ljubljana
Slovenia
;

_publ_requested_journal          'Symmetry' 
_publ_section_title
;
Supramolecular Diversity of Oxabicyclo[2.2.2]octenes Formed Between Substitued 2H-Pyran-2-ones and 
Vinyl-moiety-containing Dienophiles
;
 
_audit_creation_method            SHELXL-97
_chemical_name_systematic
;
 ?
;
_chemical_name_common             ?
_chemical_melting_point           ?
_chemical_formula_moiety          'C17 H19 N O6'
_chemical_formula_sum             'C17 H19 N O6'
_chemical_formula_weight          333.33
 
loop_
 _atom_type_symbol
 _atom_type_description
 _atom_type_scat_dispersion_real
 _atom_type_scat_dispersion_imag
 _atom_type_scat_source
 'C'  'C'   0.0033   0.0016
 'International Tables Vol C Tables 4.2.6.8 and 6.1.1.4'
 'H'  'H'   0.0000   0.0000
 'International Tables Vol C Tables 4.2.6.8 and 6.1.1.4'
 'N'  'N'   0.0061   0.0033
 'International Tables Vol C Tables 4.2.6.8 and 6.1.1.4'
 'O'  'O'   0.0106   0.0060
 'International Tables Vol C Tables 4.2.6.8 and 6.1.1.4'
 
_symmetry_cell_setting            orthorhombic
_symmetry_space_group_name_H-M    Pcab
_symmetry_space_group_name_Hall   '-P 2bc 2ac'
 
loop_
 _symmetry_equiv_pos_as_xyz
 'x, y, z'
 '-x, -y+1/2, z+1/2'
 'x+1/2, -y, -z+1/2'
 '-x+1/2, y+1/2, -z'
 '-x, -y, -z'
 'x, y-1/2, -z-1/2'
 '-x-1/2, y, z-1/2'
 'x-1/2, -y-1/2, z'
 
_cell_length_a                    13.2171(2)
_cell_length_b                    14.2221(3)
_cell_length_c                    17.1809(4)
_cell_angle_alpha                 90.00
_cell_angle_beta                  90.00
_cell_angle_gamma                 90.00
_cell_volume                      3229.58(11)
_cell_formula_units_Z             8
_cell_measurement_temperature     293(2)
_cell_measurement_reflns_used     4078
_cell_measurement_theta_min       2.55
_cell_measurement_theta_max       27.48
 
_exptl_crystal_description        block
_exptl_crystal_colour             colorless
_exptl_crystal_size_max           0.70
_exptl_crystal_size_mid           0.50
_exptl_crystal_size_min           0.50
_exptl_crystal_density_meas       ?
_exptl_crystal_density_diffrn     1.371
_exptl_crystal_density_method     'not measured'
_exptl_crystal_F_000              1408
_exptl_absorpt_coefficient_mu     0.105
_exptl_absorpt_correction_type    multi-scan
_exptl_absorpt_correction_T_min   0.9304
_exptl_absorpt_correction_T_max   0.9496
_exptl_absorpt_process_details    'SCALEPACK (Otwinowski & Minor, 1997)'
 
_exptl_special_details
;
189 frames in 3 sets of \f scans + \w scans. Rotation/frame = 2.0 \%.
Crystal-detector distance = 33.2 mm. Measuring time  = 60 s/\%.
;
 
_diffrn_ambient_temperature       293(2)
_diffrn_radiation_wavelength      0.71073
_diffrn_radiation_type            MoK\a
_diffrn_radiation_source          'fine-focus sealed tube'
_diffrn_radiation_monochromator   graphite
_diffrn_measurement_device_type   
;
Nonius KappaCCD area-detector diffractometer
;
_diffrn_measurement_method        '\f scans + \w scans'
_diffrn_detector_area_resol_mean  0.055
_diffrn_standards_number          ?
_diffrn_standards_interval_count  ?
_diffrn_standards_interval_time   ?
_diffrn_standards_decay_%         ?
_diffrn_reflns_number             6922
_diffrn_reflns_av_R_equivalents   0.0143
_diffrn_reflns_av_sigmaI/netI     0.0196
_diffrn_reflns_limit_h_min        -17
_diffrn_reflns_limit_h_max        17
_diffrn_reflns_limit_k_min        -18
_diffrn_reflns_limit_k_max        18
_diffrn_reflns_limit_l_min        -22
_diffrn_reflns_limit_l_max        22
_diffrn_reflns_theta_min          3.46
_diffrn_reflns_theta_max          27.49
_reflns_number_total              3663
_reflns_number_gt                 2876
_reflns_threshold_expression      >2\s(I)
 
_computing_data_collection        'KappaCCD Reference Manual (Nonius, 1998)'
_computing_cell_refinement        'DENZO-SMN (Otwinowski & Minor, 1997)'
_computing_data_reduction         'DENZO-SMN (Otwinowski & Minor, 1997)'
_computing_structure_solution     'SHELXS-97 (Sheldrick, 1997)'
_computing_structure_refinement   'SHELXL-97 (Sheldrick, 1997)'
_computing_molecular_graphics      ?
_computing_publication_material   'WinGX publication routines (Farrugia, 1999)'
 
_refine_special_details
;
 Refinement of F^2^ against ALL reflections.  The weighted R-factor wR and
 goodness of fit S are based on F^2^, conventional R-factors R are based
 on F, with F set to zero for negative F^2^. The threshold expression of
 F^2^ > 2\s(F^2^) is used only for calculating R-factors(gt) etc. and is
 not relevant to the choice of reflections for refinement.  R-factors based
 on F^2^ are statistically about twice as large as those based on F, and R-
 factors based on ALL data will be even larger.
;
 
_refine_ls_structure_factor_coef  Fsqd
_refine_ls_matrix_type            full
_refine_ls_weighting_scheme       calc
_refine_ls_weighting_details
 'calc w=1/[\s^2^(Fo^2^)+(0.0718P)^2^+0.9777P] where P=(Fo^2^+2Fc^2^)/3'
_atom_sites_solution_primary      direct
_atom_sites_solution_secondary    difmap
_atom_sites_solution_hydrogens    geom
_refine_ls_hydrogen_treatment     constr
_refine_ls_extinction_method      none
_refine_ls_extinction_coef        ?
_refine_ls_number_reflns          3663
_refine_ls_number_parameters      221
_refine_ls_number_restraints      0
_refine_ls_R_factor_all           0.0618
_refine_ls_R_factor_gt            0.0471
_refine_ls_wR_factor_ref          0.1429
_refine_ls_wR_factor_gt           0.1293
_refine_ls_goodness_of_fit_ref    1.044
_refine_ls_restrained_S_all       1.044
_refine_ls_shift/su_max           0.000
_refine_ls_shift/su_mean          0.000
 
loop_
 _atom_site_label
 _atom_site_type_symbol
 _atom_site_fract_x
 _atom_site_fract_y
 _atom_site_fract_z
 _atom_site_U_iso_or_equiv
 _atom_site_adp_type
 _atom_site_occupancy
 _atom_site_symmetry_multiplicity
 _atom_site_calc_flag
 _atom_site_refinement_flags
 _atom_site_disorder_assembly
 _atom_site_disorder_group
N1 N 0.52276(9) 0.08719(10) -0.08419(7) 0.0421(3) Uani 1 1 d . . .
H1 H 0.5568 0.1013 -0.0432 0.063 Uiso 1 1 calc R . .
O1 O 0.25710(8) 0.02155(8) -0.10134(7) 0.0466(3) Uani 1 1 d . . .
O2 O 0.39180(10) -0.06879(8) -0.08355(7) 0.0532(3) Uani 1 1 d . . .
O3 O 0.14496(12) 0.25421(12) -0.21824(10) 0.0777(4) Uani 1 1 d . . .
O4 O 0.42746(8) 0.22864(8) 0.00602(6) 0.0462(3) Uani 1 1 d . . .
O5 O 0.52530(9) 0.02670(10) -0.20610(7) 0.0573(4) Uani 1 1 d . . .
O6 O 0.73057(9) 0.08426(10) -0.08172(7) 0.0575(3) Uani 1 1 d . . .
C1 C 0.35639(12) 0.00861(11) -0.09118(8) 0.0415(3) Uani 1 1 d . . .
C2 C 0.41512(11) 0.10163(11) -0.08605(8) 0.0381(3) Uani 1 1 d . . .
C3 C 0.37563(11) 0.14380(11) -0.00830(8) 0.0395(3) Uani 1 1 d . . .
H3 H 0.3899 0.0996 0.0340 0.047 Uiso 1 1 calc R . .
C4 C 0.25994(12) 0.15578(13) -0.01602(9) 0.0471(4) Uani 1 1 d . . .
H4A H 0.2264 0.1201 0.0246 0.057 Uiso 1 1 calc R . .
H4B H 0.2424 0.2215 -0.0093 0.057 Uiso 1 1 calc R . .
C5 C 0.22299(11) 0.12181(12) -0.09605(9) 0.0447(4) Uani 1 1 d . . .
C6 C 0.28129(12) 0.17540(11) -0.15828(8) 0.0420(3) Uani 1 1 d . . .
C7 C 0.38074(11) 0.16414(11) -0.15141(8) 0.0401(3) Uani 1 1 d . . .
H7 H 0.4262 0.1932 -0.1850 0.048 Uiso 1 1 calc R . .
C8 C 0.10902(13) 0.11573(16) -0.10197(13) 0.0618(5) Uani 1 1 d . . .
H8A H 0.0906 0.0926 -0.1525 0.093 Uiso 1 1 calc R . .
H8B H 0.0803 0.1770 -0.0944 0.093 Uiso 1 1 calc R . .
H8C H 0.0839 0.0737 -0.0628 0.093 Uiso 1 1 calc R . .
C9 C 0.23428(14) 0.23655(12) -0.21866(10) 0.0524(4) Uani 1 1 d . . .
C10 C 0.30188(19) 0.27470(17) -0.28161(12) 0.0734(6) Uani 1 1 d . . .
H10A H 0.3219 0.2245 -0.3156 0.110 Uiso 1 1 calc R . .
H10B H 0.3609 0.3025 -0.2585 0.110 Uiso 1 1 calc R . .
H10C H 0.2660 0.3215 -0.3109 0.110 Uiso 1 1 calc R . .
C11 C 0.42650(19) 0.25120(17) 0.08728(11) 0.0731(6) Uani 1 1 d . . .
H11A H 0.4645 0.2040 0.1157 0.088 Uiso 1 1 calc R . .
H11B H 0.3573 0.2501 0.1062 0.088 Uiso 1 1 calc R . .
C12 C 0.4701(2) 0.34298(18) 0.10201(13) 0.0851(7) Uani 1 1 d . . .
H12A H 0.5386 0.3442 0.0835 0.128 Uiso 1 1 calc R . .
H12B H 0.4692 0.3555 0.1569 0.128 Uiso 1 1 calc R . .
H12C H 0.4313 0.3901 0.0754 0.128 Uiso 1 1 calc R . .
C13 C 0.57025(11) 0.05120(11) -0.14741(9) 0.0423(3) Uani 1 1 d . . .
C14 C 0.68079(12) 0.04330(11) -0.14229(9) 0.0428(3) Uani 1 1 d . . .
C15 C 0.74681(14) 0.00493(13) -0.19232(11) 0.0540(4) Uani 1 1 d . . .
H15 H 0.7316 -0.0272 -0.2380 0.065 Uiso 1 1 calc R . .
C16 C 0.84514(14) 0.02325(16) -0.16149(13) 0.0651(5) Uani 1 1 d . . .
H16 H 0.9066 0.0052 -0.1832 0.078 Uiso 1 1 calc R . .
C17 C 0.83185(14) 0.07106(17) -0.09584(13) 0.0646(5) Uani 1 1 d . . .
H17 H 0.8838 0.0925 -0.0640 0.078 Uiso 1 1 calc R . .
 
loop_
 _atom_site_aniso_label
 _atom_site_aniso_U_11
 _atom_site_aniso_U_22
 _atom_site_aniso_U_33
 _atom_site_aniso_U_23
 _atom_site_aniso_U_13
 _atom_site_aniso_U_12
N1 0.0347(6) 0.0567(8) 0.0349(6) -0.0066(5) -0.0046(5) 0.0034(5)
O1 0.0406(6) 0.0458(6) 0.0533(6) -0.0023(5) -0.0041(5) -0.0044(5)
O2 0.0605(7) 0.0452(6) 0.0541(7) -0.0039(5) -0.0070(5) 0.0057(5)
O3 0.0654(9) 0.0860(10) 0.0817(10) 0.0122(8) -0.0161(7) 0.0246(8)
O4 0.0516(6) 0.0497(6) 0.0373(5) -0.0063(4) 0.0012(5) -0.0078(5)
O5 0.0497(7) 0.0806(9) 0.0417(6) -0.0154(6) -0.0054(5) -0.0005(6)
O6 0.0430(6) 0.0803(9) 0.0493(7) -0.0123(6) -0.0023(5) 0.0008(6)
C1 0.0444(8) 0.0462(8) 0.0340(7) -0.0028(6) -0.0035(6) 0.0014(6)
C2 0.0347(7) 0.0459(8) 0.0338(7) -0.0030(6) -0.0016(5) 0.0015(6)
C3 0.0416(7) 0.0435(8) 0.0335(7) -0.0013(6) 0.0015(6) -0.0019(6)
C4 0.0414(8) 0.0564(9) 0.0435(8) -0.0044(7) 0.0065(6) 0.0004(7)
C5 0.0370(8) 0.0486(9) 0.0485(8) -0.0013(7) -0.0008(6) 0.0017(6)
C6 0.0443(8) 0.0438(8) 0.0378(7) -0.0027(6) -0.0046(6) 0.0030(6)
C7 0.0425(8) 0.0444(8) 0.0333(7) -0.0015(6) -0.0008(6) -0.0011(6)
C8 0.0384(9) 0.0746(13) 0.0723(12) -0.0012(10) -0.0017(8) -0.0001(8)
C9 0.0610(11) 0.0472(9) 0.0490(9) -0.0041(7) -0.0136(8) 0.0074(8)
C10 0.0870(15) 0.0772(14) 0.0560(11) 0.0197(10) -0.0115(11) 0.0017(11)
C11 0.0969(17) 0.0789(14) 0.0435(10) -0.0212(9) 0.0077(10) -0.0191(12)
C12 0.127(2) 0.0735(14) 0.0553(11) -0.0154(10) -0.0090(12) -0.0242(14)
C13 0.0392(8) 0.0495(9) 0.0382(8) -0.0040(6) -0.0005(6) 0.0009(6)
C14 0.0418(8) 0.0458(8) 0.0407(8) -0.0023(6) 0.0011(6) 0.0021(6)
C15 0.0532(10) 0.0579(10) 0.0510(9) -0.0103(8) 0.0085(7) 0.0069(8)
C16 0.0436(9) 0.0747(13) 0.0769(13) 0.0099(10) 0.0159(9) 0.0127(9)
C17 0.0393(9) 0.0873(15) 0.0674(12) 0.0031(10) -0.0046(8) -0.0019(9)
 
_geom_special_details
;
 All s.u.'s (except the s.u. in the dihedral angle between two l.s. planes)
 are estimated using the full covariance matrix.  The cell s.u.'s are taken
 into account individually in the estimation of s.u.'s in distances, angles
 and torsion angles; correlations between s.u.'s in cell parameters are only
 used when they are defined by crystal symmetry.  An approximate (isotropic)
 treatment of cell s.u.'s is used for estimating s.u.'s involving l.s. planes.
;
 
loop_
 _geom_bond_atom_site_label_1
 _geom_bond_atom_site_label_2
 _geom_bond_distance
 _geom_bond_site_symmetry_2
 _geom_bond_publ_flag
N1 C13 1.3549(19) . ?
N1 C2 1.4378(18) . ?
N1 H1 0.8600 . ?
O1 C1 1.3366(19) . ?
O1 C5 1.498(2) . ?
O2 C1 1.203(2) . ?
O3 C9 1.207(2) . ?
O4 C3 1.4091(18) . ?
O4 C11 1.4326(19) . ?
O5 C13 1.2211(18) . ?
O6 C14 1.3621(19) . ?
O6 C17 1.373(2) . ?
C1 C2 1.536(2) . ?
C2 C7 1.503(2) . ?
C2 C3 1.5544(19) . ?
C3 C4 1.544(2) . ?
C3 H3 0.9800 . ?
C4 C5 1.537(2) . ?
C4 H4A 0.9700 . ?
C4 H4B 0.9700 . ?
C5 C8 1.512(2) . ?
C5 C6 1.522(2) . ?
C6 C7 1.329(2) . ?
C6 C9 1.489(2) . ?
C7 H7 0.9300 . ?
C8 H8A 0.9600 . ?
C8 H8B 0.9600 . ?
C8 H8C 0.9600 . ?
C9 C10 1.504(3) . ?
C10 H10A 0.9600 . ?
C10 H10B 0.9600 . ?
C10 H10C 0.9600 . ?
C11 C12 1.449(3) . ?
C11 H11A 0.9700 . ?
C11 H11B 0.9700 . ?
C12 H12A 0.9600 . ?
C12 H12B 0.9600 . ?
C12 H12C 0.9600 . ?
C13 C14 1.468(2) . ?
C14 C15 1.341(2) . ?
C15 C16 1.427(3) . ?
C15 H15 0.9300 . ?
C16 C17 1.329(3) . ?
C16 H16 0.9300 . ?
C17 H17 0.9300 . ?
 
loop_
 _geom_angle_atom_site_label_1
 _geom_angle_atom_site_label_2
 _geom_angle_atom_site_label_3
 _geom_angle
 _geom_angle_site_symmetry_1
 _geom_angle_site_symmetry_3
 _geom_angle_publ_flag
C13 N1 C2 119.64(12) . . ?
C13 N1 H1 120.2 . . ?
C2 N1 H1 120.2 . . ?
C1 O1 C5 114.74(12) . . ?
C3 O4 C11 110.96(13) . . ?
C14 O6 C17 106.11(14) . . ?
O2 C1 O1 121.47(15) . . ?
O2 C1 C2 125.80(15) . . ?
O1 C1 C2 112.65(13) . . ?
N1 C2 C7 113.60(12) . . ?
N1 C2 C1 112.22(13) . . ?
C7 C2 C1 108.29(12) . . ?
N1 C2 C3 111.61(11) . . ?
C7 C2 C3 108.20(12) . . ?
C1 C2 C3 102.23(11) . . ?
O4 C3 C4 113.70(13) . . ?
O4 C3 C2 108.49(11) . . ?
C4 C3 C2 107.53(12) . . ?
O4 C3 H3 109.0 . . ?
C4 C3 H3 109.0 . . ?
C2 C3 H3 109.0 . . ?
C5 C4 C3 110.90(12) . . ?
C5 C4 H4A 109.5 . . ?
C3 C4 H4A 109.5 . . ?
C5 C4 H4B 109.5 . . ?
C3 C4 H4B 109.5 . . ?
H4A C4 H4B 108.0 . . ?
O1 C5 C8 103.96(13) . . ?
O1 C5 C6 106.36(12) . . ?
C8 C5 C6 119.05(15) . . ?
O1 C5 C4 104.94(12) . . ?
C8 C5 C4 113.24(14) . . ?
C6 C5 C4 108.07(13) . . ?
C7 C6 C9 123.00(15) . . ?
C7 C6 C5 112.19(13) . . ?
C9 C6 C5 124.77(14) . . ?
C6 C7 C2 115.89(14) . . ?
C6 C7 H7 122.1 . . ?
C2 C7 H7 122.1 . . ?
C5 C8 H8A 109.5 . . ?
C5 C8 H8B 109.5 . . ?
H8A C8 H8B 109.5 . . ?
C5 C8 H8C 109.5 . . ?
H8A C8 H8C 109.5 . . ?
H8B C8 H8C 109.5 . . ?
O3 C9 C6 121.69(18) . . ?
O3 C9 C10 120.68(17) . . ?
C6 C9 C10 117.62(16) . . ?
C9 C10 H10A 109.5 . . ?
C9 C10 H10B 109.5 . . ?
H10A C10 H10B 109.5 . . ?
C9 C10 H10C 109.5 . . ?
H10A C10 H10C 109.5 . . ?
H10B C10 H10C 109.5 . . ?
O4 C11 C12 111.62(18) . . ?
O4 C11 H11A 109.3 . . ?
C12 C11 H11A 109.3 . . ?
O4 C11 H11B 109.3 . . ?
C12 C11 H11B 109.3 . . ?
H11A C11 H11B 108.0 . . ?
C11 C12 H12A 109.5 . . ?
C11 C12 H12B 109.5 . . ?
H12A C12 H12B 109.5 . . ?
C11 C12 H12C 109.5 . . ?
H12A C12 H12C 109.5 . . ?
H12B C12 H12C 109.5 . . ?
O5 C13 N1 122.98(14) . . ?
O5 C13 C14 120.79(14) . . ?
N1 C13 C14 116.23(13) . . ?
C15 C14 O6 110.45(15) . . ?
C15 C14 C13 129.82(16) . . ?
O6 C14 C13 119.59(13) . . ?
C14 C15 C16 106.28(17) . . ?
C14 C15 H15 126.9 . . ?
C16 C15 H15 126.9 . . ?
C17 C16 C15 106.74(16) . . ?
C17 C16 H16 126.6 . . ?
C15 C16 H16 126.6 . . ?
C16 C17 O6 110.41(17) . . ?
C16 C17 H17 124.8 . . ?
O6 C17 H17 124.8 . . ?
 
loop_
 _geom_torsion_atom_site_label_1
 _geom_torsion_atom_site_label_2
 _geom_torsion_atom_site_label_3
 _geom_torsion_atom_site_label_4
 _geom_torsion
 _geom_torsion_site_symmetry_1
 _geom_torsion_site_symmetry_2
 _geom_torsion_site_symmetry_3
 _geom_torsion_site_symmetry_4
 _geom_torsion_publ_flag
C5 O1 C1 O2 169.88(14) . . . . ?
C5 O1 C1 C2 -6.91(17) . . . . ?
C13 N1 C2 C7 -57.03(19) . . . . ?
C13 N1 C2 C1 66.23(18) . . . . ?
C13 N1 C2 C3 -179.69(14) . . . . ?
O2 C1 C2 N1 10.1(2) . . . . ?
O1 C1 C2 N1 -173.27(12) . . . . ?
O2 C1 C2 C7 136.30(15) . . . . ?
O1 C1 C2 C7 -47.08(16) . . . . ?
O2 C1 C2 C3 -109.60(16) . . . . ?
O1 C1 C2 C3 67.02(15) . . . . ?
C11 O4 C3 C4 83.72(18) . . . . ?
C11 O4 C3 C2 -156.69(15) . . . . ?
N1 C2 C3 O4 57.06(16) . . . . ?
C7 C2 C3 O4 -68.64(15) . . . . ?
C1 C2 C3 O4 177.20(11) . . . . ?
N1 C2 C3 C4 -179.57(13) . . . . ?
C7 C2 C3 C4 54.73(15) . . . . ?
C1 C2 C3 C4 -59.42(14) . . . . ?
O4 C3 C4 C5 120.68(14) . . . . ?
C2 C3 C4 C5 0.55(17) . . . . ?
C1 O1 C5 C8 -174.94(14) . . . . ?
C1 O1 C5 C6 58.59(16) . . . . ?
C1 O1 C5 C4 -55.79(16) . . . . ?
C3 C4 C5 O1 57.15(16) . . . . ?
C3 C4 C5 C8 169.87(15) . . . . ?
C3 C4 C5 C6 -56.03(17) . . . . ?
O1 C5 C6 C7 -54.72(16) . . . . ?
C8 C5 C6 C7 -171.50(16) . . . . ?
C4 C5 C6 C7 57.50(17) . . . . ?
O1 C5 C6 C9 127.37(15) . . . . ?
C8 C5 C6 C9 10.6(2) . . . . ?
C4 C5 C6 C9 -120.40(16) . . . . ?
C9 C6 C7 C2 178.62(14) . . . . ?
C5 C6 C7 C2 0.68(19) . . . . ?
N1 C2 C7 C6 176.35(13) . . . . ?
C1 C2 C7 C6 50.97(17) . . . . ?
C3 C2 C7 C6 -59.13(17) . . . . ?
C7 C6 C9 O3 -171.35(17) . . . . ?
C5 C6 C9 O3 6.3(3) . . . . ?
C7 C6 C9 C10 9.7(2) . . . . ?
C5 C6 C9 C10 -172.63(17) . . . . ?
C3 O4 C11 C12 -173.9(2) . . . . ?
C2 N1 C13 O5 -2.7(2) . . . . ?
C2 N1 C13 C14 176.88(14) . . . . ?
C17 O6 C14 C15 0.6(2) . . . . ?
C17 O6 C14 C13 -175.63(16) . . . . ?
O5 C13 C14 C15 -5.6(3) . . . . ?
N1 C13 C14 C15 174.75(18) . . . . ?
O5 C13 C14 O6 169.78(16) . . . . ?
N1 C13 C14 O6 -9.9(2) . . . . ?
O6 C14 C15 C16 -0.3(2) . . . . ?
C13 C14 C15 C16 175.44(18) . . . . ?
C14 C15 C16 C17 -0.1(2) . . . . ?
C15 C16 C17 O6 0.5(2) . . . . ?
C14 O6 C17 C16 -0.7(2) . . . . ?
 
_diffrn_measured_fraction_theta_max    0.989
_diffrn_reflns_theta_full              27.49
_diffrn_measured_fraction_theta_full   0.989
_refine_diff_density_max    0.220
_refine_diff_density_min   -0.247
_refine_diff_density_rms    0.041
