# Supplementary material
Source: MDPI journal article supplement (https://www.mdpi.com/2073-8994/12/10/1714)
Supplement: s1 [file s1 › endo-3d.cif]

data_endo-3d

_publ_contact_author_name 'Franc Perdih'
_publ_contact_author_address
;
Faculty of Chemistry and Chemical Technology
University of Ljubljana
Ve\<cna pot 113, P. O. Box 537
SI-1000 Ljubljana
Slovenia
;

_publ_contact_author_email franc.perdih@fkkt.uni-lj.si

loop_
_publ_author_name
_publ_author_address

'Kri\<stof Kranjc'
;
Faculty of Chemistry and Chemical Technology
University of Ljubljana
Ve\<cna pot 113, P. O. Box 537
SI-1000 Ljubljana
Slovenia
;

'Amadej Juranovi\<c'
;
Faculty of Chemistry and Chemical Technology
University of Ljubljana
Ve\<cna pot 113, P. O. Box 537
SI-1000 Ljubljana
Slovenia
;

'Marijan Ko\<cevar'
;
Faculty of Chemistry and Chemical Technology
University of Ljubljana
Ve\<cna pot 113, P. O. Box 537
SI-1000 Ljubljana
Slovenia
;

'Franc Perdih'
;
Faculty of Chemistry and Chemical Technology
University of Ljubljana
Ve\<cna pot 113, P. O. Box 537
SI-1000 Ljubljana
Slovenia
;

_publ_requested_journal          'Symmetry' 
_publ_section_title
;
Supramolecular Diversity of Oxabicyclo[2.2.2]octenes Formed Between Substitued 2H-Pyran-2-ones and 
Vinyl-moiety-containing Dienophiles
;
 
_audit_creation_method            SHELXL-97
_chemical_name_systematic
;
N-[rel-(1S,4R,8S)-6-Benzoyl-8-(cyclohexyloxy)-1-methyl-3-oxo-2-oxabicyclo[2.2.2]oct-5-en-4-yl]benzamide
;
_chemical_name_common             ?
_chemical_melting_point           ?
_chemical_formula_moiety          'C28 H29 N O5'
_chemical_formula_sum             'C28 H29 N O5'
_chemical_formula_weight          459.52
 
loop_
 _atom_type_symbol
 _atom_type_description
 _atom_type_scat_dispersion_real
 _atom_type_scat_dispersion_imag
 _atom_type_scat_source
 'C'  'C'   0.0033   0.0016
 'International Tables Vol C Tables 4.2.6.8 and 6.1.1.4'
 'H'  'H'   0.0000   0.0000
 'International Tables Vol C Tables 4.2.6.8 and 6.1.1.4'
 'N'  'N'   0.0061   0.0033
 'International Tables Vol C Tables 4.2.6.8 and 6.1.1.4'
 'O'  'O'   0.0106   0.0060
 'International Tables Vol C Tables 4.2.6.8 and 6.1.1.4'
 
_symmetry_cell_setting            monoclinic
_symmetry_space_group_name_H-M    C2/c
_symmetry_space_group_name_Hall   '-C 2yc'
 
loop_
 _symmetry_equiv_pos_as_xyz
 'x, y, z'
 '-x, y, -z+1/2'
 'x+1/2, y+1/2, z'
 '-x+1/2, y+1/2, -z+1/2'
 '-x, -y, -z'
 'x, -y, z-1/2'
 '-x+1/2, -y+1/2, -z'
 'x+1/2, -y+1/2, z-1/2'
 
_cell_length_a                    25.6982(6)
_cell_length_b                    13.3577(2)
_cell_length_c                    18.3592(4)
_cell_angle_alpha                 90.00
_cell_angle_beta                  127.2900(10)
_cell_angle_gamma                 90.00
_cell_volume                      5013.85(18)
_cell_formula_units_Z             8
_cell_measurement_temperature     293(2)
_cell_measurement_reflns_used     5926
_cell_measurement_theta_min       2.55
_cell_measurement_theta_max       27.48
 
_exptl_crystal_description        prism
_exptl_crystal_colour             colorless
_exptl_crystal_size_max           0.45
_exptl_crystal_size_mid           0.25
_exptl_crystal_size_min           0.20
_exptl_crystal_density_meas       ?
_exptl_crystal_density_diffrn     1.218
_exptl_crystal_density_method     'not measured'
_exptl_crystal_F_000              1952
_exptl_absorpt_coefficient_mu     0.083
_exptl_absorpt_correction_type    multi-scan
_exptl_absorpt_correction_T_min   0.9635
_exptl_absorpt_correction_T_max   0.9835
_exptl_absorpt_process_details    'SCALEPACK (Otwinowski & Minor, 1997)'
 
_exptl_special_details
;
229 frames in 4 sets of \f scans + \w scans. Rotation/frame = 2.0 \%.
Crystal-detector distance = 25.0 mm. Measuring time  = 80 s/\%.
;
 
_diffrn_ambient_temperature       293(2)
_diffrn_radiation_wavelength      0.71073
_diffrn_radiation_type            MoK\a
_diffrn_radiation_source          'fine-focus sealed tube'
_diffrn_radiation_monochromator   graphite
_diffrn_measurement_device_type   
;
Nonius KappaCCD area-detector diffractometer
;
_diffrn_measurement_method        '\f scans + \w scans'
_diffrn_detector_area_resol_mean  0.055
_diffrn_standards_number          ?
_diffrn_standards_interval_count  ?
_diffrn_standards_interval_time   ?
_diffrn_standards_decay_%         ?
_diffrn_reflns_number             10443
_diffrn_reflns_av_R_equivalents   0.0192
_diffrn_reflns_av_sigmaI/netI     0.0281
_diffrn_reflns_limit_h_min        -33
_diffrn_reflns_limit_h_max        33
_diffrn_reflns_limit_k_min        -14
_diffrn_reflns_limit_k_max        17
_diffrn_reflns_limit_l_min        -23
_diffrn_reflns_limit_l_max        23
_diffrn_reflns_theta_min          3.19
_diffrn_reflns_theta_max          27.49
_reflns_number_total              5708
_reflns_number_gt                 3811
_reflns_threshold_expression      >2\s(I)
 
_computing_data_collection        'KappaCCD Reference Manual (Nonius, 1998)'
_computing_cell_refinement        'DENZO-SMN (Otwinowski & Minor, 1997)'
_computing_data_reduction         'DENZO-SMN (Otwinowski & Minor, 1997)'
_computing_structure_solution     'SHELXS-97 (Sheldrick, 1997)'
_computing_structure_refinement   'SHELXL-97 (Sheldrick, 1997)'
_computing_molecular_graphics     'ORTEP-3 for Windows version 2.02 (Farrugia, 2008)'
_computing_publication_material   'WinGX publication routines (Farrugia, 1999)'
 
_refine_special_details
;
 Refinement of F^2^ against ALL reflections.  The weighted R-factor wR and
 goodness of fit S are based on F^2^, conventional R-factors R are based
 on F, with F set to zero for negative F^2^. The threshold expression of
 F^2^ > 2\s(F^2^) is used only for calculating R-factors(gt) etc. and is
 not relevant to the choice of reflections for refinement.  R-factors based
 on F^2^ are statistically about twice as large as those based on F, and R-
 factors based on ALL data will be even larger.
;
 
_refine_ls_structure_factor_coef  Fsqd
_refine_ls_matrix_type            full
_refine_ls_weighting_scheme       calc
_refine_ls_weighting_details
 'calc w=1/[\s^2^(Fo^2^)+(0.0760P)^2^+2.6255P] where P=(Fo^2^+2Fc^2^)/3'
_atom_sites_solution_primary      direct
_atom_sites_solution_secondary    difmap
_atom_sites_solution_hydrogens    geom
_refine_ls_hydrogen_treatment     constr
_refine_ls_extinction_method      none
_refine_ls_extinction_coef        ?
_refine_ls_number_reflns          5708
_refine_ls_number_parameters      309
_refine_ls_number_restraints      0
_refine_ls_R_factor_all           0.0874
_refine_ls_R_factor_gt            0.0551
_refine_ls_wR_factor_ref          0.1683
_refine_ls_wR_factor_gt           0.1413
_refine_ls_goodness_of_fit_ref    1.023
_refine_ls_restrained_S_all       1.023
_refine_ls_shift/su_max           0.000
_refine_ls_shift/su_mean          0.000
 
loop_
 _atom_site_label
 _atom_site_type_symbol
 _atom_site_fract_x
 _atom_site_fract_y
 _atom_site_fract_z
 _atom_site_U_iso_or_equiv
 _atom_site_adp_type
 _atom_site_occupancy
 _atom_site_symmetry_multiplicity
 _atom_site_calc_flag
 _atom_site_refinement_flags
 _atom_site_disorder_assembly
 _atom_site_disorder_group
N1 N -0.06279(7) 0.41678(10) -0.00054(10) 0.0515(4) Uani 1 1 d . . .
H1 H -0.0318 0.4379 0.0534 0.077 Uiso 1 1 calc R . .
O1 O -0.04985(7) 0.28910(10) -0.16410(9) 0.0663(4) Uani 1 1 d . . .
O2 O -0.05670(7) 0.45144(10) -0.14560(10) 0.0707(4) Uani 1 1 d . . .
O3 O 0.02665(6) 0.26178(10) 0.10797(8) 0.0567(3) Uani 1 1 d . . .
O4 O -0.16709(6) 0.43264(10) -0.12600(10) 0.0704(4) Uani 1 1 d . . .
O5 O -0.15379(11) 0.05057(15) -0.22288(14) 0.1095(7) Uani 1 1 d . . .
C1 C -0.05426(9) 0.36640(14) -0.12156(12) 0.0563(4) Uani 1 1 d . . .
C2 C -0.05166(7) 0.33434(12) -0.03959(11) 0.0466(4) Uani 1 1 d . . .
C3 C 0.01893(8) 0.29218(13) 0.02854(11) 0.0498(4) Uani 1 1 d . . .
H3 H 0.0506 0.3451 0.0443 0.060 Uiso 1 1 calc R . .
C4 C 0.02656(9) 0.20677(15) -0.02017(14) 0.0612(5) Uani 1 1 d . . .
H4A H 0.0375 0.1454 0.0146 0.073 Uiso 1 1 calc R . .
H4B H 0.0622 0.2222 -0.0231 0.073 Uiso 1 1 calc R . .
C5 C -0.03662(10) 0.19124(14) -0.11752(14) 0.0595(5) Uani 1 1 d . . .
C6 C -0.09103(8) 0.17301(13) -0.10936(12) 0.0545(4) Uani 1 1 d . . .
C7 C -0.09799(8) 0.24803(12) -0.06809(12) 0.0491(4) Uani 1 1 d . . .
H7 H -0.1292 0.2471 -0.0577 0.059 Uiso 1 1 calc R . .
C8 C -0.02863(14) 0.1179(2) -0.17252(19) 0.0881(7) Uani 1 1 d . . .
H8A H -0.0676 0.1175 -0.2347 0.132 Uiso 1 1 calc R . .
H8B H -0.0212 0.0521 -0.1468 0.132 Uiso 1 1 calc R . .
H8C H 0.0080 0.1373 -0.1710 0.132 Uiso 1 1 calc R . .
C9 C -0.13557(10) 0.08460(15) -0.14903(16) 0.0700(6) Uani 1 1 d . . .
C10 C -0.16022(11) 0.04398(14) -0.10152(18) 0.0715(6) Uani 1 1 d . . .
C11 C -0.22027(13) -0.00558(17) -0.1528(3) 0.1010(9) Uani 1 1 d . . .
H11 H -0.2424 -0.0149 -0.2153 0.121 Uiso 1 1 calc R . .
C12 C -0.2465(2) -0.0401(3) -0.1126(5) 0.1410(17) Uani 1 1 d . . .
H12 H -0.2871 -0.0715 -0.1481 0.169 Uiso 1 1 calc R . .
C13 C -0.2148(3) -0.0298(2) -0.0209(4) 0.1383(17) Uani 1 1 d . . .
H13 H -0.2341 -0.0531 0.0053 0.166 Uiso 1 1 calc R . .
C14 C -0.1530(2) 0.0160(2) 0.0343(3) 0.1240(12) Uani 1 1 d . . .
H14 H -0.1301 0.0210 0.0973 0.149 Uiso 1 1 calc R . .
C15 C -0.12692(14) 0.05358(16) -0.0084(2) 0.0851(7) Uani 1 1 d . . .
H15 H -0.0865 0.0856 0.0265 0.102 Uiso 1 1 calc R . .
C16 C 0.09083(8) 0.28266(15) 0.19179(13) 0.0588(5) Uani 1 1 d . . .
H16 H 0.1008 0.3535 0.1917 0.071 Uiso 1 1 calc R . .
C17 C 0.14394(9) 0.22057(16) 0.20248(15) 0.0683(5) Uani 1 1 d . . .
H17A H 0.1460 0.2348 0.1525 0.082 Uiso 1 1 calc R . .
H17B H 0.1339 0.1501 0.1999 0.082 Uiso 1 1 calc R . .
C18 C 0.20975(11) 0.2433(2) 0.29310(18) 0.0934(8) Uani 1 1 d . . .
H18A H 0.2429 0.2002 0.3001 0.112 Uiso 1 1 calc R . .
H18B H 0.2217 0.3121 0.2930 0.112 Uiso 1 1 calc R . .
C19 C 0.20780(15) 0.2276(4) 0.3717(2) 0.1392(15) Uani 1 1 d . . .
H19A H 0.2494 0.2473 0.4279 0.167 Uiso 1 1 calc R . .
H19B H 0.2012 0.1571 0.3763 0.167 Uiso 1 1 calc R . .
C20 C 0.15411(16) 0.2871(4) 0.36079(19) 0.1499(17) Uani 1 1 d . . .
H20A H 0.1638 0.3579 0.3643 0.180 Uiso 1 1 calc R . .
H20B H 0.1522 0.2713 0.4107 0.180 Uiso 1 1 calc R . .
C21 C 0.08727(13) 0.2655(3) 0.26930(17) 0.1096(11) Uani 1 1 d . . .
H21A H 0.0747 0.1967 0.2683 0.132 Uiso 1 1 calc R . .
H21B H 0.0544 0.3090 0.2626 0.132 Uiso 1 1 calc R . .
C22 C -0.12254(8) 0.46135(13) -0.04917(12) 0.0531(4) Uani 1 1 d . . .
C23 C -0.13075(9) 0.54668(13) -0.00446(14) 0.0560(4) Uani 1 1 d . . .
C24 C -0.17964(10) 0.61584(15) -0.06076(18) 0.0690(5) Uani 1 1 d . . .
H24 H -0.2065 0.6074 -0.1240 0.083 Uiso 1 1 calc R . .
C25 C -0.18848(14) 0.69742(18) -0.0228(3) 0.0903(8) Uani 1 1 d . . .
H25 H -0.2207 0.7444 -0.0607 0.108 Uiso 1 1 calc R . .
C26 C -0.15014(16) 0.7092(2) 0.0698(3) 0.0997(10) Uani 1 1 d . . .
H26 H -0.1565 0.7641 0.0948 0.120 Uiso 1 1 calc R . .
C27 C -0.10243(15) 0.6412(2) 0.1261(2) 0.0952(9) Uani 1 1 d . . .
H27 H -0.0766 0.6496 0.1893 0.114 Uiso 1 1 calc R . .
C28 C -0.09231(11) 0.55931(18) 0.08926(16) 0.0724(6) Uani 1 1 d . . .
H28 H -0.0597 0.5131 0.1277 0.087 Uiso 1 1 calc R . .
 
loop_
 _atom_site_aniso_label
 _atom_site_aniso_U_11
 _atom_site_aniso_U_22
 _atom_site_aniso_U_33
 _atom_site_aniso_U_23
 _atom_site_aniso_U_13
 _atom_site_aniso_U_12
N1 0.0435(7) 0.0463(7) 0.0493(8) -0.0057(6) 0.0200(6) -0.0040(6)
O1 0.0797(9) 0.0642(8) 0.0565(8) -0.0001(6) 0.0420(7) -0.0052(7)
O2 0.0750(9) 0.0583(8) 0.0641(9) 0.0112(6) 0.0346(8) -0.0077(6)
O3 0.0401(6) 0.0710(8) 0.0484(7) 0.0099(6) 0.0212(5) -0.0023(5)
O4 0.0487(7) 0.0643(8) 0.0634(8) -0.0106(7) 0.0157(6) 0.0027(6)
O5 0.1204(16) 0.0930(13) 0.0974(13) -0.0444(11) 0.0566(12) -0.0401(11)
C1 0.0498(9) 0.0556(10) 0.0498(10) 0.0001(8) 0.0231(8) -0.0065(8)
C2 0.0404(8) 0.0428(8) 0.0465(9) -0.0004(7) 0.0210(7) -0.0032(6)
C3 0.0378(8) 0.0541(9) 0.0501(9) 0.0038(7) 0.0228(7) -0.0037(7)
C4 0.0488(9) 0.0655(11) 0.0679(12) 0.0013(9) 0.0345(9) 0.0037(8)
C5 0.0629(11) 0.0552(10) 0.0604(11) -0.0022(8) 0.0373(10) 0.0014(8)
C6 0.0487(9) 0.0456(9) 0.0557(10) -0.0016(8) 0.0246(8) -0.0025(7)
C7 0.0389(8) 0.0470(9) 0.0504(9) 0.0011(7) 0.0213(7) -0.0027(6)
C8 0.1003(18) 0.0845(16) 0.0913(17) -0.0153(13) 0.0642(16) 0.0026(14)
C9 0.0626(11) 0.0480(10) 0.0792(14) -0.0091(10) 0.0324(11) -0.0053(8)
C10 0.0656(12) 0.0417(9) 0.0968(17) 0.0012(10) 0.0437(13) -0.0003(8)
C11 0.0747(15) 0.0511(12) 0.158(3) -0.0082(14) 0.0603(18) -0.0129(11)
C12 0.120(3) 0.0723(19) 0.258(6) -0.003(3) 0.129(4) -0.0202(18)
C13 0.177(4) 0.0674(18) 0.265(6) 0.016(3) 0.183(5) -0.007(2)
C14 0.177(4) 0.0717(17) 0.183(4) 0.025(2) 0.140(3) 0.010(2)
C15 0.0974(18) 0.0508(11) 0.129(2) 0.0173(13) 0.0803(18) 0.0039(11)
C16 0.0438(9) 0.0654(11) 0.0501(10) 0.0055(8) 0.0196(8) 0.0020(8)
C17 0.0483(10) 0.0657(12) 0.0700(13) 0.0067(10) 0.0249(10) 0.0076(8)
C18 0.0467(11) 0.109(2) 0.0792(17) 0.0087(14) 0.0146(11) 0.0109(12)
C19 0.0681(17) 0.231(5) 0.0655(18) 0.034(2) 0.0128(14) 0.020(2)
C20 0.087(2) 0.283(5) 0.0506(15) -0.006(2) 0.0267(15) 0.006(3)
C21 0.0679(15) 0.193(3) 0.0579(14) 0.0098(17) 0.0331(13) 0.0096(18)
C22 0.0455(9) 0.0470(9) 0.0564(10) -0.0008(7) 0.0255(8) -0.0032(7)
C23 0.0536(10) 0.0502(9) 0.0716(12) -0.0035(8) 0.0419(10) -0.0078(7)
C24 0.0635(12) 0.0565(11) 0.0963(16) 0.0028(10) 0.0532(12) 0.0025(9)
C25 0.0880(17) 0.0621(13) 0.149(3) -0.0052(15) 0.086(2) 0.0034(12)
C26 0.104(2) 0.0834(17) 0.160(3) -0.0393(19) 0.105(2) -0.0186(16)
C27 0.1016(19) 0.112(2) 0.107(2) -0.0401(17) 0.0810(18) -0.0295(17)
C28 0.0734(13) 0.0784(14) 0.0763(14) -0.0130(11) 0.0509(12) -0.0093(11)
 
_geom_special_details
;
 All s.u.'s (except the s.u. in the dihedral angle between two l.s. planes)
 are estimated using the full covariance matrix.  The cell s.u.'s are taken
 into account individually in the estimation of s.u.'s in distances, angles
 and torsion angles; correlations between s.u.'s in cell parameters are only
 used when they are defined by crystal symmetry.  An approximate (isotropic)
 treatment of cell s.u.'s is used for estimating s.u.'s involving l.s. planes.
;
 
loop_
 _geom_bond_atom_site_label_1
 _geom_bond_atom_site_label_2
 _geom_bond_distance
 _geom_bond_site_symmetry_2
 _geom_bond_publ_flag
N1 C22 1.359(2) . ?
N1 C2 1.434(2) . ?
N1 H1 0.8600 . ?
O1 C1 1.340(2) . ?
O1 C5 1.484(2) . ?
O2 C1 1.206(2) . ?
O3 C3 1.407(2) . ?
O3 C16 1.446(2) . ?
O4 C22 1.221(2) . ?
O5 C9 1.223(3) . ?
C1 C2 1.527(3) . ?
C2 C7 1.505(2) . ?
C2 C3 1.557(2) . ?
C3 C4 1.534(3) . ?
C3 H3 0.9800 . ?
C4 C5 1.535(3) . ?
C4 H4A 0.9700 . ?
C4 H4B 0.9700 . ?
C5 C8 1.508(3) . ?
C5 C6 1.513(3) . ?
C6 C7 1.332(3) . ?
C6 C9 1.492(3) . ?
C7 H7 0.9300 . ?
C8 H8A 0.9600 . ?
C8 H8B 0.9600 . ?
C8 H8C 0.9600 . ?
C9 C10 1.458(3) . ?
C10 C15 1.378(4) . ?
C10 C11 1.395(3) . ?
C11 C12 1.348(6) . ?
C11 H11 0.9300 . ?
C12 C13 1.362(6) . ?
C12 H12 0.9300 . ?
C13 C14 1.404(6) . ?
C13 H13 0.9300 . ?
C14 C15 1.397(4) . ?
C14 H14 0.9300 . ?
C15 H15 0.9300 . ?
C16 C21 1.498(3) . ?
C16 C17 1.505(3) . ?
C16 H16 0.9800 . ?
C17 C18 1.520(3) . ?
C17 H17A 0.9700 . ?
C17 H17B 0.9700 . ?
C18 C19 1.488(5) . ?
C18 H18A 0.9700 . ?
C18 H18B 0.9700 . ?
C19 C20 1.497(5) . ?
C19 H19A 0.9700 . ?
C19 H19B 0.9700 . ?
C20 C21 1.536(4) . ?
C20 H20A 0.9700 . ?
C20 H20B 0.9700 . ?
C21 H21A 0.9700 . ?
C21 H21B 0.9700 . ?
C22 C23 1.492(3) . ?
C23 C28 1.380(3) . ?
C23 C24 1.388(3) . ?
C24 C25 1.384(3) . ?
C24 H24 0.9300 . ?
C25 C26 1.363(4) . ?
C25 H25 0.9300 . ?
C26 C27 1.365(4) . ?
C26 H26 0.9300 . ?
C27 C28 1.391(3) . ?
C27 H27 0.9300 . ?
C28 H28 0.9300 . ?
 
loop_
 _geom_angle_atom_site_label_1
 _geom_angle_atom_site_label_2
 _geom_angle_atom_site_label_3
 _geom_angle
 _geom_angle_site_symmetry_1
 _geom_angle_site_symmetry_3
 _geom_angle_publ_flag
C22 N1 C2 119.73(14) . . ?
C22 N1 H1 120.1 . . ?
C2 N1 H1 120.1 . . ?
C1 O1 C5 114.41(14) . . ?
C3 O3 C16 113.64(13) . . ?
O2 C1 O1 121.08(18) . . ?
O2 C1 C2 125.89(18) . . ?
O1 C1 C2 112.94(15) . . ?
N1 C2 C7 114.00(14) . . ?
N1 C2 C1 111.99(14) . . ?
C7 C2 C1 108.61(14) . . ?
N1 C2 C3 111.37(13) . . ?
C7 C2 C3 107.07(13) . . ?
C1 C2 C3 103.13(13) . . ?
O3 C3 C4 113.71(15) . . ?
O3 C3 C2 107.52(13) . . ?
C4 C3 C2 107.40(14) . . ?
O3 C3 H3 109.4 . . ?
C4 C3 H3 109.4 . . ?
C2 C3 H3 109.4 . . ?
C3 C4 C5 111.14(14) . . ?
C3 C4 H4A 109.4 . . ?
C5 C4 H4A 109.4 . . ?
C3 C4 H4B 109.4 . . ?
C5 C4 H4B 109.4 . . ?
H4A C4 H4B 108.0 . . ?
O1 C5 C8 105.25(18) . . ?
O1 C5 C6 107.22(15) . . ?
C8 C5 C6 118.07(18) . . ?
O1 C5 C4 105.26(15) . . ?
C8 C5 C4 112.97(18) . . ?
C6 C5 C4 107.18(16) . . ?
C7 C6 C9 123.06(18) . . ?
C7 C6 C5 112.69(15) . . ?
C9 C6 C5 124.11(17) . . ?
C6 C7 C2 115.05(16) . . ?
C6 C7 H7 122.5 . . ?
C2 C7 H7 122.5 . . ?
C5 C8 H8A 109.5 . . ?
C5 C8 H8B 109.5 . . ?
H8A C8 H8B 109.5 . . ?
C5 C8 H8C 109.5 . . ?
H8A C8 H8C 109.5 . . ?
H8B C8 H8C 109.5 . . ?
O5 C9 C10 120.8(2) . . ?
O5 C9 C6 120.1(2) . . ?
C10 C9 C6 119.0(2) . . ?
C15 C10 C11 118.9(3) . . ?
C15 C10 C9 122.6(2) . . ?
C11 C10 C9 118.5(3) . . ?
C12 C11 C10 120.6(4) . . ?
C12 C11 H11 119.7 . . ?
C10 C11 H11 119.7 . . ?
C11 C12 C13 121.2(4) . . ?
C11 C12 H12 119.4 . . ?
C13 C12 H12 119.4 . . ?
C12 C13 C14 120.3(3) . . ?
C12 C13 H13 119.8 . . ?
C14 C13 H13 119.8 . . ?
C15 C14 C13 117.9(4) . . ?
C15 C14 H14 121.0 . . ?
C13 C14 H14 121.0 . . ?
C10 C15 C14 120.9(3) . . ?
C10 C15 H15 119.5 . . ?
C14 C15 H15 119.5 . . ?
O3 C16 C21 107.13(17) . . ?
O3 C16 C17 113.08(17) . . ?
C21 C16 C17 111.36(19) . . ?
O3 C16 H16 108.4 . . ?
C21 C16 H16 108.4 . . ?
C17 C16 H16 108.4 . . ?
C16 C17 C18 110.6(2) . . ?
C16 C17 H17A 109.5 . . ?
C18 C17 H17A 109.5 . . ?
C16 C17 H17B 109.5 . . ?
C18 C17 H17B 109.5 . . ?
H17A C17 H17B 108.1 . . ?
C19 C18 C17 111.4(2) . . ?
C19 C18 H18A 109.4 . . ?
C17 C18 H18A 109.4 . . ?
C19 C18 H18B 109.4 . . ?
C17 C18 H18B 109.4 . . ?
H18A C18 H18B 108.0 . . ?
C18 C19 C20 111.5(3) . . ?
C18 C19 H19A 109.3 . . ?
C20 C19 H19A 109.3 . . ?
C18 C19 H19B 109.3 . . ?
C20 C19 H19B 109.3 . . ?
H19A C19 H19B 108.0 . . ?
C19 C20 C21 112.1(3) . . ?
C19 C20 H20A 109.2 . . ?
C21 C20 H20A 109.2 . . ?
C19 C20 H20B 109.2 . . ?
C21 C20 H20B 109.2 . . ?
H20A C20 H20B 107.9 . . ?
C16 C21 C20 109.8(2) . . ?
C16 C21 H21A 109.7 . . ?
C20 C21 H21A 109.7 . . ?
C16 C21 H21B 109.7 . . ?
C20 C21 H21B 109.7 . . ?
H21A C21 H21B 108.2 . . ?
O4 C22 N1 121.11(17) . . ?
O4 C22 C23 121.95(16) . . ?
N1 C22 C23 116.94(16) . . ?
C28 C23 C24 119.2(2) . . ?
C28 C23 C22 123.09(18) . . ?
C24 C23 C22 117.68(18) . . ?
C25 C24 C23 120.0(2) . . ?
C25 C24 H24 120.0 . . ?
C23 C24 H24 120.0 . . ?
C26 C25 C24 120.3(3) . . ?
C26 C25 H25 119.9 . . ?
C24 C25 H25 119.9 . . ?
C25 C26 C27 120.5(2) . . ?
C25 C26 H26 119.8 . . ?
C27 C26 H26 119.8 . . ?
C26 C27 C28 120.1(3) . . ?
C26 C27 H27 119.9 . . ?
C28 C27 H27 119.9 . . ?
C23 C28 C27 119.9(2) . . ?
C23 C28 H28 120.0 . . ?
C27 C28 H28 120.0 . . ?
 
loop_
 _geom_torsion_atom_site_label_1
 _geom_torsion_atom_site_label_2
 _geom_torsion_atom_site_label_3
 _geom_torsion_atom_site_label_4
 _geom_torsion
 _geom_torsion_site_symmetry_1
 _geom_torsion_site_symmetry_2
 _geom_torsion_site_symmetry_3
 _geom_torsion_site_symmetry_4
 _geom_torsion_publ_flag
C5 O1 C1 O2 170.67(17) . . . . ?
C5 O1 C1 C2 -6.0(2) . . . . ?
C22 N1 C2 C7 -56.7(2) . . . . ?
C22 N1 C2 C1 67.10(19) . . . . ?
C22 N1 C2 C3 -178.00(15) . . . . ?
O2 C1 C2 N1 9.2(2) . . . . ?
O1 C1 C2 N1 -174.37(14) . . . . ?
O2 C1 C2 C7 135.97(19) . . . . ?
O1 C1 C2 C7 -47.58(19) . . . . ?
O2 C1 C2 C3 -110.7(2) . . . . ?
O1 C1 C2 C3 65.78(17) . . . . ?
C16 O3 C3 C4 99.36(17) . . . . ?
C16 O3 C3 C2 -141.88(14) . . . . ?
N1 C2 C3 O3 58.76(17) . . . . ?
C7 C2 C3 O3 -66.48(17) . . . . ?
C1 C2 C3 O3 179.03(13) . . . . ?
N1 C2 C3 C4 -178.50(14) . . . . ?
C7 C2 C3 C4 56.26(18) . . . . ?
C1 C2 C3 C4 -58.22(17) . . . . ?
O3 C3 C4 C5 118.54(17) . . . . ?
C2 C3 C4 C5 -0.3(2) . . . . ?
C1 O1 C5 C8 -175.83(17) . . . . ?
C1 O1 C5 C6 57.6(2) . . . . ?
C1 O1 C5 C4 -56.3(2) . . . . ?
C3 C4 C5 O1 57.80(19) . . . . ?
C3 C4 C5 C8 172.12(18) . . . . ?
C3 C4 C5 C6 -56.1(2) . . . . ?
O1 C5 C6 C7 -54.5(2) . . . . ?
C8 C5 C6 C7 -173.02(19) . . . . ?
C4 C5 C6 C7 58.1(2) . . . . ?
O1 C5 C6 C9 121.21(19) . . . . ?
C8 C5 C6 C9 2.7(3) . . . . ?
C4 C5 C6 C9 -126.20(19) . . . . ?
C9 C6 C7 C2 -175.12(17) . . . . ?
C5 C6 C7 C2 0.6(2) . . . . ?
N1 C2 C7 C6 176.30(15) . . . . ?
C1 C2 C7 C6 50.7(2) . . . . ?
C3 C2 C7 C6 -60.06(19) . . . . ?
C7 C6 C9 O5 138.6(2) . . . . ?
C5 C6 C9 O5 -36.7(3) . . . . ?
C7 C6 C9 C10 -37.4(3) . . . . ?
C5 C6 C9 C10 147.30(19) . . . . ?
O5 C9 C10 C15 157.2(2) . . . . ?
C6 C9 C10 C15 -26.8(3) . . . . ?
O5 C9 C10 C11 -23.5(3) . . . . ?
C6 C9 C10 C11 152.5(2) . . . . ?
C15 C10 C11 C12 2.6(4) . . . . ?
C9 C10 C11 C12 -176.7(3) . . . . ?
C10 C11 C12 C13 -1.5(5) . . . . ?
C11 C12 C13 C14 -1.1(6) . . . . ?
C12 C13 C14 C15 2.5(5) . . . . ?
C11 C10 C15 C14 -1.0(3) . . . . ?
C9 C10 C15 C14 178.3(2) . . . . ?
C13 C14 C15 C10 -1.5(4) . . . . ?
C3 O3 C16 C21 168.9(2) . . . . ?
C3 O3 C16 C17 -68.0(2) . . . . ?
O3 C16 C17 C18 -178.10(18) . . . . ?
C21 C16 C17 C18 -57.4(3) . . . . ?
C16 C17 C18 C19 56.2(3) . . . . ?
C17 C18 C19 C20 -54.9(4) . . . . ?
C18 C19 C20 C21 54.6(5) . . . . ?
O3 C16 C21 C20 -179.6(3) . . . . ?
C17 C16 C21 C20 56.2(4) . . . . ?
C19 C20 C21 C16 -54.9(5) . . . . ?
C2 N1 C22 O4 -0.3(3) . . . . ?
C2 N1 C22 C23 180.00(15) . . . . ?
O4 C22 C23 C28 156.4(2) . . . . ?
N1 C22 C23 C28 -23.8(3) . . . . ?
O4 C22 C23 C24 -23.5(3) . . . . ?
N1 C22 C23 C24 156.26(17) . . . . ?
C28 C23 C24 C25 1.3(3) . . . . ?
C22 C23 C24 C25 -178.75(18) . . . . ?
C23 C24 C25 C26 -1.2(3) . . . . ?
C24 C25 C26 C27 0.4(4) . . . . ?
C25 C26 C27 C28 0.4(4) . . . . ?
C24 C23 C28 C27 -0.6(3) . . . . ?
C22 C23 C28 C27 179.48(19) . . . . ?
C26 C27 C28 C23 -0.2(4) . . . . ?
 
loop_
 _geom_hbond_atom_site_label_D
 _geom_hbond_atom_site_label_H
 _geom_hbond_atom_site_label_A
 _geom_hbond_distance_DH
 _geom_hbond_distance_HA
 _geom_hbond_distance_DA
 _geom_hbond_angle_DHA
 _geom_hbond_site_symmetry_A
N1 H1 O2  0.86 2.36 3.121(2) 148.3 5_565
 
_diffrn_measured_fraction_theta_max    0.992
_diffrn_reflns_theta_full              27.49
_diffrn_measured_fraction_theta_full   0.992
_refine_diff_density_max    0.254
_refine_diff_density_min   -0.230
_refine_diff_density_rms    0.035
