# Supplementary material
Source: MDPI journal article supplement (https://www.mdpi.com/2073-8994/12/10/1714)
Supplement: s1 [file s1 › endo-3e-6a.cif]

data_endo-3e

_publ_contact_author_name 'Franc Perdih'
_publ_contact_author_address
;
Faculty of Chemistry and Chemical Technology
University of Ljubljana
Ve\<cna pot 113, P. O. Box 537
SI-1000 Ljubljana
Slovenia
;

_publ_contact_author_email franc.perdih@fkkt.uni-lj.si

loop_
_publ_author_name
_publ_author_address

'Kri\<stof Kranjc'
;
Faculty of Chemistry and Chemical Technology
University of Ljubljana
Ve\<cna pot 113, P. O. Box 537
SI-1000 Ljubljana
Slovenia
;

'Amadej Juranovi\<c'
;
Faculty of Chemistry and Chemical Technology
University of Ljubljana
Ve\<cna pot 113, P. O. Box 537
SI-1000 Ljubljana
Slovenia
;

'Marijan Ko\<cevar'
;
Faculty of Chemistry and Chemical Technology
University of Ljubljana
Ve\<cna pot 113, P. O. Box 537
SI-1000 Ljubljana
Slovenia
;

'Franc Perdih'
;
Faculty of Chemistry and Chemical Technology
University of Ljubljana
Ve\<cna pot 113, P. O. Box 537
SI-1000 Ljubljana
Slovenia
;

_publ_requested_journal          'Symmetry' 
_publ_section_title
;
Supramolecular Diversity of Oxabicyclo[2.2.2]octenes Formed Between Substitued 2H-Pyran-2-ones and 
Vinyl-moiety-containing Dienophiles
;

_audit_creation_method            SHELXL-97
_chemical_name_systematic
;
N-[rel-(1S,4R,8S)-6-Acetyl-8-(2-oxo-1-pyrrolidinyl)-1-methyl-3-oxo-2-oxabicyclo[2.2.2]oct-5-en-4-yl]-3,4,5-trimethoxybenzamide 1-vinyl-2-pyrrolidone solvate
;
_chemical_name_common             ?
_chemical_melting_point           ?
_chemical_formula_moiety         'C24 H28 N2 O8, C6 H9 N O'
_chemical_formula_sum            'C30 H37 N3 O9'
_chemical_formula_weight          583.63
 
loop_
 _atom_type_symbol
 _atom_type_description
 _atom_type_scat_dispersion_real
 _atom_type_scat_dispersion_imag
 _atom_type_scat_source
 'C'  'C'   0.0033   0.0016
 'International Tables Vol C Tables 4.2.6.8 and 6.1.1.4'
 'H'  'H'   0.0000   0.0000
 'International Tables Vol C Tables 4.2.6.8 and 6.1.1.4'
 'N'  'N'   0.0061   0.0033
 'International Tables Vol C Tables 4.2.6.8 and 6.1.1.4'
 'O'  'O'   0.0106   0.0060
 'International Tables Vol C Tables 4.2.6.8 and 6.1.1.4'
 
_symmetry_cell_setting            triclinic
_symmetry_space_group_name_H-M    P-1
_symmetry_space_group_name_Hall   '-P 1'
 
loop_
 _symmetry_equiv_pos_as_xyz
 'x, y, z'
 '-x, -y, -z'
 
_cell_length_a                    11.2314(3)
_cell_length_b                    11.6094(3)
_cell_length_c                    12.1689(3)
_cell_angle_alpha                 85.027(2)
_cell_angle_beta                  73.439(2)
_cell_angle_gamma                 78.714(2)
_cell_volume                      1490.66(7)
_cell_formula_units_Z             2
_cell_measurement_temperature     293(2)
_cell_measurement_reflns_used     6661
_cell_measurement_theta_min       2.55
_cell_measurement_theta_max       27.48
 
_exptl_crystal_description        prism
_exptl_crystal_colour             colorless
_exptl_crystal_size_max           0.50
_exptl_crystal_size_mid           0.13
_exptl_crystal_size_min           0.13
_exptl_crystal_density_meas       ?
_exptl_crystal_density_diffrn     1.300
_exptl_crystal_density_method     'not measured'
_exptl_crystal_F_000              620
_exptl_absorpt_coefficient_mu     0.097
_exptl_absorpt_correction_type    multi-scan
_exptl_absorpt_correction_T_min   0.9533
_exptl_absorpt_correction_T_max   0.9876
_exptl_absorpt_process_details    'SCALEPACK (Otwinowski & Minor, 1997)'
 
_exptl_special_details
;
187 frames in 5 sets of \w scans. Rotation/frame = 2.0 \%.
Crystal-detector distance = 25.0 mm. Measuring time  = 60 s/\%.
;
 
_diffrn_ambient_temperature       293(2)
_diffrn_radiation_wavelength      0.71073
_diffrn_radiation_type            MoK\a
_diffrn_radiation_source          'fine-focus sealed tube'
_diffrn_radiation_monochromator   graphite
_diffrn_measurement_device_type   
;
Nonius KappaCCD area-detector diffractometer
;
_diffrn_measurement_method        '\w scans'
_diffrn_detector_area_resol_mean  0.055
_diffrn_standards_number          ?
_diffrn_standards_interval_count  ?
_diffrn_standards_interval_time   ?
_diffrn_standards_decay_%         ?
_diffrn_reflns_number             12041
_diffrn_reflns_av_R_equivalents   0.0232
_diffrn_reflns_av_sigmaI/netI     0.0356
_diffrn_reflns_limit_h_min        -14
_diffrn_reflns_limit_h_max        13
_diffrn_reflns_limit_k_min        -15
_diffrn_reflns_limit_k_max        15
_diffrn_reflns_limit_l_min        -15
_diffrn_reflns_limit_l_max        15
_diffrn_reflns_theta_min          3.50
_diffrn_reflns_theta_max          27.51
_reflns_number_total              6796
_reflns_number_gt                 4907
_reflns_threshold_expression      >2\s(I)
 
_computing_data_collection        'KappaCCD Reference Manual (Nonius, 1998)'
_computing_cell_refinement        'DENZO-SMN (Otwinowski & Minor, 1997)'
_computing_data_reduction         'DENZO-SMN (Otwinowski & Minor, 1997)'
_computing_structure_solution     'SHELXS-97 (Sheldrick, 1997)'
_computing_structure_refinement   'SHELXL-97 (Sheldrick, 1997)'
_computing_molecular_graphics     'ORTEP-3 for Windows version 2.02 (Farrugia, 2008)'
_computing_publication_material   'WinGX publication routines (Farrugia, 1999)'
 
_refine_special_details
;
 Refinement of F^2^ against ALL reflections.  The weighted R-factor wR and
 goodness of fit S are based on F^2^, conventional R-factors R are based
 on F, with F set to zero for negative F^2^. The threshold expression of
 F^2^ > 2\s(F^2^) is used only for calculating R-factors(gt) etc. and is
 not relevant to the choice of reflections for refinement.  R-factors based
 on F^2^ are statistically about twice as large as those based on F, and R-
 factors based on ALL data will be even larger.
;
 
_refine_ls_structure_factor_coef  Fsqd
_refine_ls_matrix_type            full
_refine_ls_weighting_scheme       calc
_refine_ls_weighting_details
 'calc w=1/[\s^2^(Fo^2^)+(0.0660P)^2^+0.3532P] where P=(Fo^2^+2Fc^2^)/3'
_atom_sites_solution_primary      direct
_atom_sites_solution_secondary    difmap
_atom_sites_solution_hydrogens    geom
_refine_ls_hydrogen_treatment     constr
_refine_ls_extinction_method      none
_refine_ls_extinction_coef        ?
_refine_ls_number_reflns          6796
_refine_ls_number_parameters      385
_refine_ls_number_restraints      0
_refine_ls_R_factor_all           0.0715
_refine_ls_R_factor_gt            0.0482
_refine_ls_wR_factor_ref          0.1385
_refine_ls_wR_factor_gt           0.1219
_refine_ls_goodness_of_fit_ref    1.017
_refine_ls_restrained_S_all       1.017
_refine_ls_shift/su_max           0.001
_refine_ls_shift/su_mean          0.000
 
loop_
 _atom_site_label
 _atom_site_type_symbol
 _atom_site_fract_x
 _atom_site_fract_y
 _atom_site_fract_z
 _atom_site_U_iso_or_equiv
 _atom_site_adp_type
 _atom_site_occupancy
 _atom_site_symmetry_multiplicity
 _atom_site_calc_flag
 _atom_site_refinement_flags
 _atom_site_disorder_assembly
 _atom_site_disorder_group
N1 N 0.27777(11) 0.57376(10) 0.84953(11) 0.0355(3) Uani 1 1 d . . .
H1 H 0.2391 0.5283 0.9013 0.053 Uiso 1 1 calc R . .
N2 N 0.04561(11) 0.68115(11) 1.00792(11) 0.0360(3) Uani 1 1 d . . .
O1 O 0.23657(14) 0.60531(11) 0.63070(11) 0.0591(3) Uani 1 1 d . . .
O2 O 0.14336(11) 0.79073(10) 0.66134(9) 0.0459(3) Uani 1 1 d . . .
O3 O 0.15265(17) 1.08917(13) 0.8430(2) 0.0988(6) Uani 1 1 d . . .
O4 O -0.12621(11) 0.59593(10) 1.02600(11) 0.0504(3) Uani 1 1 d . . .
O5 O 0.46167(11) 0.60507(10) 0.72504(11) 0.0518(3) Uani 1 1 d . . .
O6 O 0.74248(11) 0.19630(11) 0.72601(10) 0.0531(3) Uani 1 1 d . . .
O7 O 0.66183(11) 0.11707(10) 0.94478(10) 0.0475(3) Uani 1 1 d . . .
O8 O 0.45808(11) 0.22767(11) 1.09014(9) 0.0493(3) Uani 1 1 d . . .
C1 C 0.20221(15) 0.68605(13) 0.69362(13) 0.0395(3) Uani 1 1 d . . .
C2 C 0.20998(13) 0.68388(12) 0.81747(12) 0.0327(3) Uani 1 1 d . . .
C3 C 0.26542(14) 0.78914(13) 0.82765(13) 0.0358(3) Uani 1 1 d . . .
H3 H 0.3355 0.7833 0.8555 0.043 Uiso 1 1 calc R . .
C4 C 0.20676(14) 0.89131(13) 0.79388(14) 0.0394(3) Uani 1 1 d . . .
C5 C 0.09534(15) 0.87931(13) 0.75190(14) 0.0409(3) Uani 1 1 d . . .
C6 C 0.00282(15) 0.82451(14) 0.85026(15) 0.0429(4) Uani 1 1 d . . .
H6A H -0.0707 0.8172 0.8265 0.051 Uiso 1 1 calc R . .
H6B H -0.0250 0.8751 0.9156 0.051 Uiso 1 1 calc R . .
C7 C 0.06658(13) 0.70209(13) 0.88524(13) 0.0343(3) Uani 1 1 d . . .
H7 H 0.0297 0.6440 0.8582 0.041 Uiso 1 1 calc R . .
C8 C 0.23695(18) 1.00683(15) 0.81108(17) 0.0522(4) Uani 1 1 d . . .
C9 C 0.3720(2) 1.01552(17) 0.7901(2) 0.0638(5) Uani 1 1 d . . .
H9A H 0.3779 1.0918 0.8105 0.096 Uiso 1 1 calc R . .
H9B H 0.4149 1.0041 0.7103 0.096 Uiso 1 1 calc R . .
H9C H 0.4104 0.9563 0.8357 0.096 Uiso 1 1 calc R . .
C10 C 0.03361(19) 0.98577(16) 0.69434(18) 0.0583(5) Uani 1 1 d . . .
H10A H -0.0276 0.9637 0.6629 0.087 Uiso 1 1 calc R . .
H10B H 0.0967 1.0160 0.6339 0.087 Uiso 1 1 calc R . .
H10C H -0.0074 1.0452 0.7497 0.087 Uiso 1 1 calc R . .
C11 C -0.05352(14) 0.63152(13) 1.06875(14) 0.0399(3) Uani 1 1 d . . .
C12 C -0.0593(2) 0.62979(17) 1.19323(16) 0.0561(5) Uani 1 1 d . . .
H12A H -0.0654 0.5519 1.2278 0.067 Uiso 1 1 calc R . .
H12B H -0.1314 0.6853 1.2342 0.067 Uiso 1 1 calc R . .
C13 C 0.0624(2) 0.6645(2) 1.19533(17) 0.0678(6) Uani 1 1 d . . .
H13A H 0.1229 0.5957 1.2068 0.081 Uiso 1 1 calc R . .
H13B H 0.0477 0.7181 1.2567 0.081 Uiso 1 1 calc R . .
C14 C 0.11124(17) 0.72437(16) 1.07891(14) 0.0485(4) Uani 1 1 d . . .
H14A H 0.0898 0.8092 1.0835 0.058 Uiso 1 1 calc R . .
H14B H 0.2020 0.7015 1.0495 0.058 Uiso 1 1 calc R . .
C15 C 0.40297(14) 0.54180(13) 0.79782(13) 0.0376(3) Uani 1 1 d . . .
C16 C 0.46677(13) 0.42669(13) 0.83717(13) 0.0357(3) Uani 1 1 d . . .
C17 C 0.57247(14) 0.36704(14) 0.75964(13) 0.0401(3) Uani 1 1 d . . .
H17 H 0.6001 0.3975 0.6854 0.048 Uiso 1 1 calc R . .
C18 C 0.63650(14) 0.26153(14) 0.79397(13) 0.0385(3) Uani 1 1 d . . .
C19 C 0.59583(14) 0.21680(12) 0.90578(13) 0.0358(3) Uani 1 1 d . . .
C20 C 0.49014(14) 0.27802(13) 0.98257(12) 0.0355(3) Uani 1 1 d . . .
C21 C 0.42513(14) 0.38307(13) 0.94851(13) 0.0367(3) Uani 1 1 d . . .
H21 H 0.3544 0.4237 0.9998 0.044 Uiso 1 1 calc R . .
C22 C 0.7709(2) 0.2189(2) 0.60601(17) 0.0779(7) Uani 1 1 d . . .
H22A H 0.7959 0.2944 0.5882 0.117 Uiso 1 1 calc R . .
H22B H 0.6976 0.2185 0.5806 0.117 Uiso 1 1 calc R . .
H22C H 0.8386 0.1592 0.5679 0.117 Uiso 1 1 calc R . .
C23 C 0.6649(2) 0.01007(16) 0.8950(2) 0.0655(5) Uani 1 1 d . . .
H23A H 0.7056 0.0143 0.8142 0.098 Uiso 1 1 calc R . .
H23B H 0.5802 -0.0028 0.9068 0.098 Uiso 1 1 calc R . .
H23C H 0.7110 -0.0537 0.9303 0.098 Uiso 1 1 calc R . .
C24 C 0.34405(18) 0.28082(19) 1.16879(15) 0.0580(5) Uani 1 1 d . . .
H24A H 0.2758 0.2900 1.1342 0.087 Uiso 1 1 calc R . .
H24B H 0.3531 0.3565 1.1882 0.087 Uiso 1 1 calc R . .
H24C H 0.3264 0.2318 1.2371 0.087 Uiso 1 1 calc R . .
N3 N 0.25483(17) 0.25922(16) 0.47987(14) 0.0612(4) Uani 1 1 d . . .
O9 O 0.3303(3) 0.06361(19) 0.4569(3) 0.1489(11) Uani 1 1 d . . .
C25 C 0.0676(3) 0.3553(3) 0.4309(3) 0.1031(9) Uani 1 1 d . . .
H25A H 0.0865 0.4291 0.4348 0.124 Uiso 1 1 calc R . .
H25B H -0.0056 0.3489 0.4122 0.124 Uiso 1 1 calc R . .
C26 C 0.1435(2) 0.2609(3) 0.4514(2) 0.0763(6) Uani 1 1 d . . .
H26 H 0.1212 0.1889 0.4466 0.092 Uiso 1 1 calc R . .
C27 C 0.2970(2) 0.3645(2) 0.49691(19) 0.0658(5) Uani 1 1 d . . .
H27A H 0.2321 0.4137 0.5528 0.079 Uiso 1 1 calc R . .
H27B H 0.3198 0.4095 0.4255 0.079 Uiso 1 1 calc R . .
C28 C 0.4109(3) 0.3178(3) 0.5406(2) 0.0939(9) Uani 1 1 d . . .
H28A H 0.4746 0.3671 0.5131 0.113 Uiso 1 1 calc R . .
H28B H 0.3875 0.3141 0.6238 0.113 Uiso 1 1 calc R . .
C29 C 0.4587(3) 0.1967(3) 0.4931(3) 0.0975(9) Uani 1 1 d . . .
H29A H 0.5237 0.1985 0.4210 0.117 Uiso 1 1 calc R . .
H29B H 0.4927 0.1430 0.5468 0.117 Uiso 1 1 calc R . .
C30 C 0.3449(3) 0.1608(2) 0.4757(3) 0.0864(7) Uani 1 1 d . . .
 
loop_
 _atom_site_aniso_label
 _atom_site_aniso_U_11
 _atom_site_aniso_U_22
 _atom_site_aniso_U_33
 _atom_site_aniso_U_23
 _atom_site_aniso_U_13
 _atom_site_aniso_U_12
N1 0.0286(6) 0.0304(6) 0.0423(7) 0.0067(5) -0.0047(5) -0.0037(5)
N2 0.0322(6) 0.0354(6) 0.0391(7) -0.0006(5) -0.0057(5) -0.0091(5)
O1 0.0764(9) 0.0477(7) 0.0510(7) -0.0104(6) -0.0187(7) -0.0002(6)
O2 0.0548(7) 0.0404(6) 0.0423(6) 0.0023(5) -0.0186(5) -0.0022(5)
O3 0.0755(11) 0.0444(8) 0.177(2) -0.0340(10) -0.0376(12) 0.0044(8)
O4 0.0358(6) 0.0494(7) 0.0654(8) 0.0057(6) -0.0087(5) -0.0171(5)
O5 0.0377(6) 0.0435(6) 0.0594(7) 0.0139(5) 0.0031(5) -0.0037(5)
O6 0.0420(6) 0.0595(7) 0.0426(6) -0.0019(5) -0.0035(5) 0.0144(5)
O7 0.0506(7) 0.0367(6) 0.0561(7) 0.0003(5) -0.0247(6) 0.0040(5)
O8 0.0474(7) 0.0535(7) 0.0382(6) 0.0090(5) -0.0069(5) -0.0003(5)
C1 0.0395(8) 0.0355(7) 0.0411(8) 0.0008(6) -0.0091(7) -0.0046(6)
C2 0.0287(7) 0.0283(6) 0.0377(7) 0.0022(5) -0.0062(6) -0.0025(5)
C3 0.0301(7) 0.0351(7) 0.0402(8) 0.0014(6) -0.0069(6) -0.0061(6)
C4 0.0353(8) 0.0333(7) 0.0470(8) 0.0014(6) -0.0084(7) -0.0059(6)
C5 0.0395(8) 0.0336(7) 0.0471(8) 0.0019(6) -0.0132(7) 0.0002(6)
C6 0.0314(7) 0.0406(8) 0.0534(9) 0.0011(7) -0.0117(7) 0.0001(6)
C7 0.0278(7) 0.0352(7) 0.0395(7) -0.0001(6) -0.0082(6) -0.0068(6)
C8 0.0542(10) 0.0347(8) 0.0687(11) 0.0010(8) -0.0198(9) -0.0073(7)
C9 0.0639(12) 0.0496(10) 0.0868(15) 0.0118(10) -0.0294(11) -0.0247(9)
C10 0.0602(11) 0.0430(9) 0.0705(12) 0.0106(9) -0.0270(10) 0.0014(8)
C11 0.0333(7) 0.0310(7) 0.0488(9) 0.0012(6) -0.0022(6) -0.0050(6)
C12 0.0665(12) 0.0468(9) 0.0467(9) 0.0007(8) 0.0021(9) -0.0181(9)
C13 0.0833(15) 0.0799(14) 0.0470(10) 0.0061(10) -0.0210(10) -0.0297(12)
C14 0.0501(10) 0.0538(10) 0.0455(9) -0.0045(7) -0.0123(8) -0.0189(8)
C15 0.0323(7) 0.0344(7) 0.0415(8) 0.0022(6) -0.0056(6) -0.0036(6)
C16 0.0295(7) 0.0346(7) 0.0412(8) 0.0010(6) -0.0086(6) -0.0039(6)
C17 0.0334(7) 0.0436(8) 0.0385(8) 0.0045(6) -0.0071(6) -0.0019(6)
C18 0.0288(7) 0.0429(8) 0.0400(8) -0.0052(6) -0.0074(6) 0.0008(6)
C19 0.0335(7) 0.0327(7) 0.0427(8) -0.0005(6) -0.0162(6) -0.0016(6)
C20 0.0333(7) 0.0394(8) 0.0345(7) 0.0025(6) -0.0108(6) -0.0075(6)
C21 0.0300(7) 0.0377(7) 0.0384(7) -0.0020(6) -0.0057(6) -0.0021(6)
C22 0.0612(13) 0.1075(18) 0.0419(10) -0.0054(11) -0.0032(9) 0.0243(12)
C23 0.0704(13) 0.0389(9) 0.0871(15) -0.0069(9) -0.0271(12) 0.0006(9)
C24 0.0498(10) 0.0723(12) 0.0420(9) 0.0048(9) -0.0021(8) -0.0060(9)
N3 0.0602(10) 0.0654(10) 0.0572(9) -0.0020(8) -0.0075(8) -0.0222(8)
O9 0.141(2) 0.0610(12) 0.248(3) 0.0045(16) -0.057(2) -0.0237(13)
C25 0.0598(15) 0.132(3) 0.119(2) -0.013(2) -0.0244(16) -0.0168(17)
C26 0.0641(14) 0.0950(18) 0.0731(14) -0.0098(13) -0.0096(11) -0.0326(13)
C27 0.0662(13) 0.0730(13) 0.0579(11) -0.0132(10) -0.0044(10) -0.0254(11)
C28 0.0908(19) 0.141(3) 0.0661(14) 0.0069(16) -0.0279(14) -0.0526(19)
C29 0.0776(17) 0.102(2) 0.114(2) 0.0429(18) -0.0351(16) -0.0246(16)
C30 0.0873(18) 0.0661(15) 0.103(2) 0.0179(14) -0.0228(15) -0.0201(13)
 
_geom_special_details
;
 All s.u.'s (except the s.u. in the dihedral angle between two l.s. planes)
 are estimated using the full covariance matrix.  The cell s.u.'s are taken
 into account individually in the estimation of s.u.'s in distances, angles
 and torsion angles; correlations between s.u.'s in cell parameters are only
 used when they are defined by crystal symmetry.  An approximate (isotropic)
 treatment of cell s.u.'s is used for estimating s.u.'s involving l.s. planes.
;
 
loop_
 _geom_bond_atom_site_label_1
 _geom_bond_atom_site_label_2
 _geom_bond_distance
 _geom_bond_site_symmetry_2
 _geom_bond_publ_flag
N1 C15 1.3574(19) . ?
N1 C2 1.4381(17) . ?
N1 H1 0.8600 . ?
N2 C11 1.3517(19) . ?
N2 C7 1.4499(19) . ?
N2 C14 1.457(2) . ?
O1 C1 1.1951(19) . ?
O2 C1 1.3487(18) . ?
O2 C5 1.4844(19) . ?
O3 C8 1.209(2) . ?
O4 C11 1.233(2) . ?
O5 C15 1.2257(18) . ?
O6 C18 1.3670(18) . ?
O6 C22 1.416(2) . ?
O7 C19 1.3728(17) . ?
O7 C23 1.419(2) . ?
O8 C20 1.3659(18) . ?
O8 C24 1.425(2) . ?
C1 C2 1.532(2) . ?
C2 C3 1.505(2) . ?
C2 C7 1.5680(19) . ?
C3 C4 1.332(2) . ?
C3 H3 0.9300 . ?
C4 C8 1.492(2) . ?
C4 C5 1.514(2) . ?
C5 C10 1.513(2) . ?
C5 C6 1.528(2) . ?
C6 C7 1.544(2) . ?
C6 H6A 0.9700 . ?
C6 H6B 0.9700 . ?
C7 H7 0.9800 . ?
C8 C9 1.487(3) . ?
C9 H9A 0.9600 . ?
C9 H9B 0.9600 . ?
C9 H9C 0.9600 . ?
C10 H10A 0.9600 . ?
C10 H10B 0.9600 . ?
C10 H10C 0.9600 . ?
C11 C12 1.496(2) . ?
C12 C13 1.506(3) . ?
C12 H12A 0.9700 . ?
C12 H12B 0.9700 . ?
C13 C14 1.525(3) . ?
C13 H13A 0.9700 . ?
C13 H13B 0.9700 . ?
C14 H14A 0.9700 . ?
C14 H14B 0.9700 . ?
C15 C16 1.496(2) . ?
C16 C21 1.387(2) . ?
C16 C17 1.390(2) . ?
C17 C18 1.389(2) . ?
C17 H17 0.9300 . ?
C18 C19 1.395(2) . ?
C19 C20 1.393(2) . ?
C20 C21 1.389(2) . ?
C21 H21 0.9300 . ?
C22 H22A 0.9600 . ?
C22 H22B 0.9600 . ?
C22 H22C 0.9600 . ?
C23 H23A 0.9600 . ?
C23 H23B 0.9600 . ?
C23 H23C 0.9600 . ?
C24 H24A 0.9600 . ?
C24 H24B 0.9600 . ?
C24 H24C 0.9600 . ?
N3 C30 1.363(3) . ?
N3 C26 1.385(3) . ?
N3 C27 1.445(3) . ?
O9 C30 1.222(3) . ?
C25 C26 1.304(4) . ?
C25 H25A 0.9300 . ?
C25 H25B 0.9300 . ?
C26 H26 0.9300 . ?
C27 C28 1.510(4) . ?
C27 H27A 0.9700 . ?
C27 H27B 0.9700 . ?
C28 C29 1.507(4) . ?
C28 H28A 0.9700 . ?
C28 H28B 0.9700 . ?
C29 C30 1.493(4) . ?
C29 H29A 0.9700 . ?
C29 H29B 0.9700 . ?
 
loop_
 _geom_angle_atom_site_label_1
 _geom_angle_atom_site_label_2
 _geom_angle_atom_site_label_3
 _geom_angle
 _geom_angle_site_symmetry_1
 _geom_angle_site_symmetry_3
 _geom_angle_publ_flag
C15 N1 C2 119.77(12) . . ?
C15 N1 H1 120.1 . . ?
C2 N1 H1 120.1 . . ?
C11 N2 C7 119.78(13) . . ?
C11 N2 C14 113.71(13) . . ?
C7 N2 C14 125.88(12) . . ?
C1 O2 C5 114.99(11) . . ?
C18 O6 C22 118.01(13) . . ?
C19 O7 C23 116.69(13) . . ?
C20 O8 C24 117.60(13) . . ?
O1 C1 O2 120.92(15) . . ?
O1 C1 C2 126.48(14) . . ?
O2 C1 C2 112.49(12) . . ?
N1 C2 C3 114.28(12) . . ?
N1 C2 C1 112.13(12) . . ?
C3 C2 C1 106.59(12) . . ?
N1 C2 C7 111.45(11) . . ?
C3 C2 C7 110.40(11) . . ?
C1 C2 C7 101.11(11) . . ?
C4 C3 C2 115.04(13) . . ?
C4 C3 H3 122.5 . . ?
C2 C3 H3 122.5 . . ?
C3 C4 C8 123.00(15) . . ?
C3 C4 C5 113.12(13) . . ?
C8 C4 C5 123.36(13) . . ?
O2 C5 C10 104.13(13) . . ?
O2 C5 C4 106.60(12) . . ?
C10 C5 C4 117.96(14) . . ?
O2 C5 C6 105.83(12) . . ?
C10 C5 C6 113.75(14) . . ?
C4 C5 C6 107.61(13) . . ?
C5 C6 C7 110.25(12) . . ?
C5 C6 H6A 109.6 . . ?
C7 C6 H6A 109.6 . . ?
C5 C6 H6B 109.6 . . ?
C7 C6 H6B 109.6 . . ?
H6A C6 H6B 108.1 . . ?
N2 C7 C6 114.46(12) . . ?
N2 C7 C2 113.19(11) . . ?
C6 C7 C2 107.94(12) . . ?
N2 C7 H7 106.9 . . ?
C6 C7 H7 106.9 . . ?
C2 C7 H7 106.9 . . ?
O3 C8 C9 122.09(17) . . ?
O3 C8 C4 119.96(17) . . ?
C9 C8 C4 117.93(16) . . ?
C8 C9 H9A 109.5 . . ?
C8 C9 H9B 109.5 . . ?
H9A C9 H9B 109.5 . . ?
C8 C9 H9C 109.5 . . ?
H9A C9 H9C 109.5 . . ?
H9B C9 H9C 109.5 . . ?
C5 C10 H10A 109.5 . . ?
C5 C10 H10B 109.5 . . ?
H10A C10 H10B 109.5 . . ?
C5 C10 H10C 109.5 . . ?
H10A C10 H10C 109.5 . . ?
H10B C10 H10C 109.5 . . ?
O4 C11 N2 124.20(15) . . ?
O4 C11 C12 127.19(15) . . ?
N2 C11 C12 108.60(14) . . ?
C11 C12 C13 104.77(15) . . ?
C11 C12 H12A 110.8 . . ?
C13 C12 H12A 110.8 . . ?
C11 C12 H12B 110.8 . . ?
C13 C12 H12B 110.8 . . ?
H12A C12 H12B 108.9 . . ?
C12 C13 C14 105.82(16) . . ?
C12 C13 H13A 110.6 . . ?
C14 C13 H13A 110.6 . . ?
C12 C13 H13B 110.6 . . ?
C14 C13 H13B 110.6 . . ?
H13A C13 H13B 108.7 . . ?
N2 C14 C13 102.71(14) . . ?
N2 C14 H14A 111.2 . . ?
C13 C14 H14A 111.2 . . ?
N2 C14 H14B 111.2 . . ?
C13 C14 H14B 111.2 . . ?
H14A C14 H14B 109.1 . . ?
O5 C15 N1 121.99(13) . . ?
O5 C15 C16 121.58(13) . . ?
N1 C15 C16 116.40(13) . . ?
C21 C16 C17 121.00(13) . . ?
C21 C16 C15 121.26(13) . . ?
C17 C16 C15 117.69(13) . . ?
C18 C17 C16 119.43(14) . . ?
C18 C17 H17 120.3 . . ?
C16 C17 H17 120.3 . . ?
O6 C18 C17 124.62(14) . . ?
O6 C18 C19 115.19(13) . . ?
C17 C18 C19 120.16(13) . . ?
O7 C19 C20 118.59(13) . . ?
O7 C19 C18 121.63(13) . . ?
C20 C19 C18 119.66(13) . . ?
O8 C20 C21 124.17(13) . . ?
O8 C20 C19 115.37(13) . . ?
C21 C20 C19 120.45(13) . . ?
C16 C21 C20 119.29(13) . . ?
C16 C21 H21 120.4 . . ?
C20 C21 H21 120.4 . . ?
O6 C22 H22A 109.5 . . ?
O6 C22 H22B 109.5 . . ?
H22A C22 H22B 109.5 . . ?
O6 C22 H22C 109.5 . . ?
H22A C22 H22C 109.5 . . ?
H22B C22 H22C 109.5 . . ?
O7 C23 H23A 109.5 . . ?
O7 C23 H23B 109.5 . . ?
H23A C23 H23B 109.5 . . ?
O7 C23 H23C 109.5 . . ?
H23A C23 H23C 109.5 . . ?
H23B C23 H23C 109.5 . . ?
O8 C24 H24A 109.5 . . ?
O8 C24 H24B 109.5 . . ?
H24A C24 H24B 109.5 . . ?
O8 C24 H24C 109.5 . . ?
H24A C24 H24C 109.5 . . ?
H24B C24 H24C 109.5 . . ?
C30 N3 C26 123.2(2) . . ?
C30 N3 C27 112.85(19) . . ?
C26 N3 C27 123.1(2) . . ?
C26 C25 H25A 120.0 . . ?
C26 C25 H25B 120.0 . . ?
H25A C25 H25B 120.0 . . ?
C25 C26 N3 125.3(3) . . ?
C25 C26 H26 117.4 . . ?
N3 C26 H26 117.4 . . ?
N3 C27 C28 103.3(2) . . ?
N3 C27 H27A 111.1 . . ?
C28 C27 H27A 111.1 . . ?
N3 C27 H27B 111.1 . . ?
C28 C27 H27B 111.1 . . ?
H27A C27 H27B 109.1 . . ?
C29 C28 C27 104.4(2) . . ?
C29 C28 H28A 110.9 . . ?
C27 C28 H28A 110.9 . . ?
C29 C28 H28B 110.9 . . ?
C27 C28 H28B 110.9 . . ?
H28A C28 H28B 108.9 . . ?
C30 C29 C28 104.3(2) . . ?
C30 C29 H29A 110.9 . . ?
C28 C29 H29A 110.9 . . ?
C30 C29 H29B 110.9 . . ?
C28 C29 H29B 110.9 . . ?
H29A C29 H29B 108.9 . . ?
O9 C30 N3 123.2(3) . . ?
O9 C30 C29 128.9(3) . . ?
N3 C30 C29 107.8(2) . . ?
 
loop_
 _geom_torsion_atom_site_label_1
 _geom_torsion_atom_site_label_2
 _geom_torsion_atom_site_label_3
 _geom_torsion_atom_site_label_4
 _geom_torsion
 _geom_torsion_site_symmetry_1
 _geom_torsion_site_symmetry_2
 _geom_torsion_site_symmetry_3
 _geom_torsion_site_symmetry_4
 _geom_torsion_publ_flag
C5 O2 C1 O1 174.50(16) . . . . ?
C5 O2 C1 C2 -1.93(18) . . . . ?
C15 N1 C2 C3 -55.33(18) . . . . ?
C15 N1 C2 C1 66.11(17) . . . . ?
C15 N1 C2 C7 178.65(13) . . . . ?
O1 C1 C2 N1 6.4(2) . . . . ?
O2 C1 C2 N1 -177.41(12) . . . . ?
O1 C1 C2 C3 132.16(18) . . . . ?
O2 C1 C2 C3 -51.65(16) . . . . ?
O1 C1 C2 C7 -112.42(18) . . . . ?
O2 C1 C2 C7 63.76(15) . . . . ?
N1 C2 C3 C4 177.41(13) . . . . ?
C1 C2 C3 C4 52.96(16) . . . . ?
C7 C2 C3 C4 -56.02(17) . . . . ?
C2 C3 C4 C8 172.00(15) . . . . ?
C2 C3 C4 C5 -0.01(19) . . . . ?
C1 O2 C5 C10 -179.40(14) . . . . ?
C1 O2 C5 C4 55.18(17) . . . . ?
C1 O2 C5 C6 -59.20(16) . . . . ?
C3 C4 C5 O2 -54.21(17) . . . . ?
C8 C4 C5 O2 133.82(16) . . . . ?
C3 C4 C5 C10 -170.74(16) . . . . ?
C8 C4 C5 C10 17.3(2) . . . . ?
C3 C4 C5 C6 58.95(17) . . . . ?
C8 C4 C5 C6 -113.03(17) . . . . ?
O2 C5 C6 C7 53.20(16) . . . . ?
C10 C5 C6 C7 166.90(14) . . . . ?
C4 C5 C6 C7 -60.47(16) . . . . ?
C11 N2 C7 C6 91.40(16) . . . . ?
C14 N2 C7 C6 -78.87(18) . . . . ?
C11 N2 C7 C2 -144.34(13) . . . . ?
C14 N2 C7 C2 45.40(19) . . . . ?
C5 C6 C7 N2 134.12(13) . . . . ?
C5 C6 C7 C2 7.11(17) . . . . ?
N1 C2 C7 N2 49.40(16) . . . . ?
C3 C2 C7 N2 -78.74(14) . . . . ?
C1 C2 C7 N2 168.72(11) . . . . ?
N1 C2 C7 C6 177.14(12) . . . . ?
C3 C2 C7 C6 49.01(15) . . . . ?
C1 C2 C7 C6 -63.54(14) . . . . ?
C3 C4 C8 O3 -137.4(2) . . . . ?
C5 C4 C8 O3 33.8(3) . . . . ?
C3 C4 C8 C9 41.4(3) . . . . ?
C5 C4 C8 C9 -147.38(18) . . . . ?
C7 N2 C11 O4 4.0(2) . . . . ?
C14 N2 C11 O4 175.42(15) . . . . ?
C7 N2 C11 C12 -175.12(13) . . . . ?
C14 N2 C11 C12 -3.72(18) . . . . ?
O4 C11 C12 C13 170.95(17) . . . . ?
N2 C11 C12 C13 -9.94(19) . . . . ?
C11 C12 C13 C14 18.9(2) . . . . ?
C11 N2 C14 C13 15.45(19) . . . . ?
C7 N2 C14 C13 -173.77(15) . . . . ?
C12 C13 C14 N2 -20.6(2) . . . . ?
C2 N1 C15 O5 1.2(2) . . . . ?
C2 N1 C15 C16 179.24(13) . . . . ?
O5 C15 C16 C21 148.28(16) . . . . ?
N1 C15 C16 C21 -29.8(2) . . . . ?
O5 C15 C16 C17 -29.2(2) . . . . ?
N1 C15 C16 C17 152.74(14) . . . . ?
C21 C16 C17 C18 0.7(2) . . . . ?
C15 C16 C17 C18 178.16(14) . . . . ?
C22 O6 C18 C17 -17.4(3) . . . . ?
C22 O6 C18 C19 164.45(18) . . . . ?
C16 C17 C18 O6 -178.86(15) . . . . ?
C16 C17 C18 C19 -0.8(2) . . . . ?
C23 O7 C19 C20 116.67(18) . . . . ?
C23 O7 C19 C18 -67.3(2) . . . . ?
O6 C18 C19 O7 2.7(2) . . . . ?
C17 C18 C19 O7 -175.50(14) . . . . ?
O6 C18 C19 C20 178.69(13) . . . . ?
C17 C18 C19 C20 0.5(2) . . . . ?
C24 O8 C20 C21 6.1(2) . . . . ?
C24 O8 C20 C19 -174.27(15) . . . . ?
O7 C19 C20 O8 -3.5(2) . . . . ?
C18 C19 C20 O8 -179.63(13) . . . . ?
O7 C19 C20 C21 176.14(13) . . . . ?
C18 C19 C20 C21 0.0(2) . . . . ?
C17 C16 C21 C20 -0.2(2) . . . . ?
C15 C16 C21 C20 -177.56(13) . . . . ?
O8 C20 C21 C16 179.44(14) . . . . ?
C19 C20 C21 C16 -0.2(2) . . . . ?
C30 N3 C26 C25 -164.9(3) . . . . ?
C27 N3 C26 C25 3.8(4) . . . . ?
C30 N3 C27 C28 -17.4(3) . . . . ?
C26 N3 C27 C28 172.9(2) . . . . ?
N3 C27 C28 C29 25.9(2) . . . . ?
C27 C28 C29 C30 -25.6(3) . . . . ?
C26 N3 C30 O9 -7.0(4) . . . . ?
C27 N3 C30 O9 -176.7(3) . . . . ?
C26 N3 C30 C29 170.8(2) . . . . ?
C27 N3 C30 C29 1.1(3) . . . . ?
C28 C29 C30 O9 -166.7(3) . . . . ?
C28 C29 C30 N3 15.7(3) . . . . ?
 
loop_
 _geom_hbond_atom_site_label_D
 _geom_hbond_atom_site_label_H
 _geom_hbond_atom_site_label_A
 _geom_hbond_distance_DH
 _geom_hbond_distance_HA
 _geom_hbond_distance_DA
 _geom_hbond_angle_DHA
 _geom_hbond_site_symmetry_A
N1 H1 O4  0.86 2.08 2.8979(16) 158.6 2_567
 
_diffrn_measured_fraction_theta_max    0.991
_diffrn_reflns_theta_full              27.51
_diffrn_measured_fraction_theta_full   0.991
_refine_diff_density_max    0.328
_refine_diff_density_min   -0.287
_refine_diff_density_rms    0.038
