# Supplementary material
Source: MDPI journal article supplement (https://www.mdpi.com/2073-8994/12/10/1714)
Supplement: s1 [file s1 › exo-3e.cif]

data_exo-3e

_publ_contact_author_name 'Franc Perdih'
_publ_contact_author_address
;
Faculty of Chemistry and Chemical Technology
University of Ljubljana
Ve\<cna pot 113, P. O. Box 537
SI-1000 Ljubljana
Slovenia
;

_publ_contact_author_email franc.perdih@fkkt.uni-lj.si

loop_
_publ_author_name
_publ_author_address

'Kri\<stof Kranjc'
;
Faculty of Chemistry and Chemical Technology
University of Ljubljana
Ve\<cna pot 113, P. O. Box 537
SI-1000 Ljubljana
Slovenia
;

'Amadej Juranovi\<c'
;
Faculty of Chemistry and Chemical Technology
University of Ljubljana
Ve\<cna pot 113, P. O. Box 537
SI-1000 Ljubljana
Slovenia
;

'Marijan Ko\<cevar'
;
Faculty of Chemistry and Chemical Technology
University of Ljubljana
Ve\<cna pot 113, P. O. Box 537
SI-1000 Ljubljana
Slovenia
;

'Franc Perdih'
;
Faculty of Chemistry and Chemical Technology
University of Ljubljana
Ve\<cna pot 113, P. O. Box 537
SI-1000 Ljubljana
Slovenia
;

_publ_requested_journal          'Symmetry' 
_publ_section_title
;
Supramolecular Diversity of Oxabicyclo[2.2.2]octenes Formed Between Substitued 2H-Pyran-2-ones and 
Vinyl-moiety-containing Dienophiles
;
 
_audit_creation_method            SHELXL-97
_chemical_name_systematic
;
N-[rel-(1S,4R,8R)-6-Acetyl-8-(2-oxo-1-pyrrolidinyl)-1-methyl-3-oxo-2-oxabicyclo[2.2.2]oct-5-en-4-yl]-3,4,5-trimethoxybenzamide
;
_chemical_name_common             ?
_chemical_melting_point           ?
_chemical_formula_moiety          'C24 H28 N2 O8'
_chemical_formula_sum             'C24 H28 N2 O8'
_chemical_formula_weight          472.48
 
loop_
 _atom_type_symbol
 _atom_type_description
 _atom_type_scat_dispersion_real
 _atom_type_scat_dispersion_imag
 _atom_type_scat_source
 'C'  'C'   0.0033   0.0016
 'International Tables Vol C Tables 4.2.6.8 and 6.1.1.4'
 'H'  'H'   0.0000   0.0000
 'International Tables Vol C Tables 4.2.6.8 and 6.1.1.4'
 'N'  'N'   0.0061   0.0033
 'International Tables Vol C Tables 4.2.6.8 and 6.1.1.4'
 'O'  'O'   0.0106   0.0060
 'International Tables Vol C Tables 4.2.6.8 and 6.1.1.4'
 
_symmetry_cell_setting            monoclinic
_symmetry_space_group_name_H-M    P21/n
_symmetry_space_group_name_Hall   '-P 2yn'
 
loop_
 _symmetry_equiv_pos_as_xyz
 'x, y, z'
 '-x+1/2, y+1/2, -z+1/2'
 '-x, -y, -z'
 'x-1/2, -y-1/2, z-1/2'
 
_cell_length_a                    10.1996(4)
_cell_length_b                    19.6440(11)
_cell_length_c                    12.5325(6)
_cell_angle_alpha                 90.00
_cell_angle_beta                  113.734(3)
_cell_angle_gamma                 90.00
_cell_volume                      2298.65(19)
_cell_formula_units_Z             4
_cell_measurement_temperature     293(2)
_cell_measurement_reflns_used     4284
_cell_measurement_theta_min       2.55
_cell_measurement_theta_max       25.35
 
_exptl_crystal_description        prism
_exptl_crystal_colour             colorless
_exptl_crystal_size_max           0.35
_exptl_crystal_size_mid           0.10
_exptl_crystal_size_min           0.10
_exptl_crystal_density_meas       ?
_exptl_crystal_density_diffrn     1.365
_exptl_crystal_density_method     'not measured'
_exptl_crystal_F_000              1000
_exptl_absorpt_coefficient_mu     0.103
_exptl_absorpt_correction_type    multi-scan
_exptl_absorpt_correction_T_min   0.9648
_exptl_absorpt_correction_T_max   0.9898
_exptl_absorpt_process_details    'SCALEPACK (Otwinowski & Minor, 1997)'
 
_exptl_special_details
;
211 frames in 4 sets of \f scans + \w scans. Rotation/frame = 1.8 \%.
Crystal-detector distance = 30.0 mm. Measuring time  = 160 s/\%.
;
 
_diffrn_ambient_temperature       293(2)
_diffrn_radiation_wavelength      0.71073
_diffrn_radiation_type            MoK\a
_diffrn_radiation_source          'fine-focus sealed tube'
_diffrn_radiation_monochromator   graphite
_diffrn_measurement_device_type   
;
Nonius KappaCCD area-detector diffractometer
;
_diffrn_measurement_method        '\f scans + \w scans'
_diffrn_detector_area_resol_mean  0.055
_diffrn_standards_number          ?
_diffrn_standards_interval_count  ?
_diffrn_standards_interval_time   ?
_diffrn_standards_decay_%         ?
_diffrn_reflns_number             8146
_diffrn_reflns_av_R_equivalents   0.0551
_diffrn_reflns_av_sigmaI/netI     0.0671
_diffrn_reflns_limit_h_min        -12
_diffrn_reflns_limit_h_max        12
_diffrn_reflns_limit_k_min        -23
_diffrn_reflns_limit_k_max        23
_diffrn_reflns_limit_l_min        -15
_diffrn_reflns_limit_l_max        15
_diffrn_reflns_theta_min          3.55
_diffrn_reflns_theta_max          25.37
_reflns_number_total              4170
_reflns_number_gt                 2445
_reflns_threshold_expression      >2\s(I)
 
_computing_data_collection        'KappaCCD Reference Manual (Nonius, 1998)'
_computing_cell_refinement        'DENZO-SMN (Otwinowski & Minor, 1997)'
_computing_data_reduction         'DENZO-SMN (Otwinowski & Minor, 1997)'
_computing_structure_solution     'SHELXS-97 (Sheldrick, 1997)'
_computing_structure_refinement   'SHELXL-97 (Sheldrick, 1997)'
_computing_molecular_graphics     'ORTEP-3 for Windows version 2.02 (Farrugia, 2008)'
_computing_publication_material   'WinGX publication routines (Farrugia, 1999)'
 
_refine_special_details
;
 Refinement of F^2^ against ALL reflections.  The weighted R-factor wR and
 goodness of fit S are based on F^2^, conventional R-factors R are based
 on F, with F set to zero for negative F^2^. The threshold expression of
 F^2^ > 2\s(F^2^) is used only for calculating R-factors(gt) etc. and is
 not relevant to the choice of reflections for refinement.  R-factors based
 on F^2^ are statistically about twice as large as those based on F, and R-
 factors based on ALL data will be even larger.
;
 
_refine_ls_structure_factor_coef  Fsqd
_refine_ls_matrix_type            full
_refine_ls_weighting_scheme       calc
_refine_ls_weighting_details
 'calc w=1/[\s^2^(Fo^2^)+(0.0595P)^2^+1.4079P] where P=(Fo^2^+2Fc^2^)/3'
_atom_sites_solution_primary      direct
_atom_sites_solution_secondary    difmap
_atom_sites_solution_hydrogens    geom
_refine_ls_hydrogen_treatment     constr
_refine_ls_extinction_method      none
_refine_ls_extinction_coef        ?
_refine_ls_number_reflns          4170
_refine_ls_number_parameters      313
_refine_ls_number_restraints      0
_refine_ls_R_factor_all           0.1184
_refine_ls_R_factor_gt            0.0573
_refine_ls_wR_factor_ref          0.1572
_refine_ls_wR_factor_gt           0.1252
_refine_ls_goodness_of_fit_ref    1.038
_refine_ls_restrained_S_all       1.038
_refine_ls_shift/su_max           0.000
_refine_ls_shift/su_mean          0.000
 
loop_
 _atom_site_label
 _atom_site_type_symbol
 _atom_site_fract_x
 _atom_site_fract_y
 _atom_site_fract_z
 _atom_site_U_iso_or_equiv
 _atom_site_adp_type
 _atom_site_occupancy
 _atom_site_symmetry_multiplicity
 _atom_site_calc_flag
 _atom_site_refinement_flags
 _atom_site_disorder_assembly
 _atom_site_disorder_group
O1 O 0.3601(2) 0.77414(11) 0.36359(19) 0.0489(6) Uani 1 1 d . . .
O2 O 0.3140(3) 0.77437(13) 0.5222(2) 0.0613(7) Uani 1 1 d . . .
O3 O -0.1834(2) 0.82882(13) 0.2960(2) 0.0584(7) Uani 1 1 d . . .
O4 O 0.3012(2) 0.93038(13) 0.5557(2) 0.0560(7) Uani 1 1 d . . .
O5 O 0.3782(3) 0.90311(15) 0.0952(2) 0.0791(9) Uani 1 1 d . . .
O6 O 0.1666(2) 1.02146(14) 0.8753(2) 0.0582(7) Uani 1 1 d . . .
O7 O -0.0853(2) 0.96644(12) 0.8374(2) 0.0519(6) Uani 1 1 d . . .
O8 O -0.2391(2) 0.90181(13) 0.6391(2) 0.0543(6) Uani 1 1 d . . .
N1 N -0.0086(3) 0.75757(13) 0.2903(2) 0.0395(6) Uani 1 1 d . . .
N2 N 0.1040(3) 0.87755(13) 0.4293(2) 0.0416(6) Uani 1 1 d . . .
H2 H 0.0139 0.8702 0.4079 0.062 Uiso 1 1 calc R . .
C1 C 0.2891(3) 0.79677(17) 0.4272(3) 0.0442(8) Uani 1 1 d . . .
C2 C 0.1766(3) 0.84999(16) 0.3613(3) 0.0383(7) Uani 1 1 d . . .
C3 C 0.2472(3) 0.90195(16) 0.3150(3) 0.0392(7) Uani 1 1 d . . .
H3 H 0.2442 0.9482 0.3297 0.047 Uiso 1 1 calc R . .
C4 C 0.3146(3) 0.87800(16) 0.2515(3) 0.0409(7) Uani 1 1 d . . .
C5 C 0.3082(3) 0.80110(17) 0.2425(3) 0.0438(8) Uani 1 1 d . . .
C6 C 0.1499(3) 0.78079(18) 0.1838(3) 0.0472(8) Uani 1 1 d . . .
H6A H 0.1418 0.7316 0.1800 0.057 Uiso 1 1 calc R . .
H6B H 0.1088 0.7983 0.1048 0.057 Uiso 1 1 calc R . .
C7 C 0.0666(3) 0.80938(16) 0.2530(3) 0.0399(7) Uani 1 1 d . . .
H7 H -0.0046 0.8418 0.2028 0.048 Uiso 1 1 calc R . .
C8 C 0.4019(4) 0.7670(2) 0.1908(4) 0.0644(11) Uani 1 1 d . . .
H8A H 0.4014 0.7187 0.2021 0.097 Uiso 1 1 calc R . .
H8B H 0.4981 0.7838 0.2286 0.097 Uiso 1 1 calc R . .
H8C H 0.3660 0.7768 0.1090 0.097 Uiso 1 1 calc R . .
C9 C 0.3726(3) 0.92300(19) 0.1854(3) 0.0485(8) Uani 1 1 d . . .
C10 C 0.4170(4) 0.99278(19) 0.2292(3) 0.0578(10) Uani 1 1 d . . .
H10A H 0.4571 1.0150 0.1810 0.087 Uiso 1 1 calc R . .
H10B H 0.4875 0.9907 0.3079 0.087 Uiso 1 1 calc R . .
H10C H 0.3353 1.0179 0.2270 0.087 Uiso 1 1 calc R . .
C11 C 0.0238(4) 0.68435(17) 0.3014(3) 0.0513(9) Uani 1 1 d . . .
H11A H 0.1245 0.6762 0.3485 0.062 Uiso 1 1 calc R . .
H11B H -0.0020 0.6633 0.2256 0.062 Uiso 1 1 calc R . .
C12 C -0.0685(4) 0.6582(2) 0.3610(4) 0.0642(10) Uani 1 1 d . . .
H12A H -0.0182 0.6605 0.4451 0.077 Uiso 1 1 calc R . .
H12B H -0.0976 0.6115 0.3386 0.077 Uiso 1 1 calc R . .
C13 C -0.1967(4) 0.70552(19) 0.3184(4) 0.0586(10) Uani 1 1 d . . .
H13A H -0.2711 0.6889 0.2466 0.070 Uiso 1 1 calc R . .
H13B H -0.2362 0.7109 0.3766 0.070 Uiso 1 1 calc R . .
C14 C -0.1341(3) 0.77097(18) 0.2989(3) 0.0457(8) Uani 1 1 d . . .
C15 C 0.1755(3) 0.91473(16) 0.5263(3) 0.0409(7) Uani 1 1 d . . .
C16 C 0.0938(3) 0.93322(16) 0.5980(3) 0.0378(7) Uani 1 1 d . . .
C17 C 0.1670(3) 0.97188(16) 0.6974(3) 0.0395(7) Uani 1 1 d . . .
H17 H 0.2569 0.9895 0.7107 0.047 Uiso 1 1 calc R . .
C18 C 0.1064(3) 0.98427(17) 0.7764(3) 0.0410(8) Uani 1 1 d . . .
C19 C -0.0279(3) 0.95668(16) 0.7569(3) 0.0397(7) Uani 1 1 d . . .
C20 C -0.1046(3) 0.92229(16) 0.6536(3) 0.0386(7) Uani 1 1 d . . .
C21 C -0.0436(3) 0.90947(16) 0.5749(3) 0.0407(7) Uani 1 1 d . . .
H21 H -0.0941 0.8851 0.5070 0.049 Uiso 1 1 calc R . .
C22 C 0.3058(4) 1.0490(2) 0.9032(3) 0.0574(10) Uani 1 1 d . . .
H22A H 0.3051 1.0760 0.8391 0.086 Uiso 1 1 calc R . .
H22B H 0.3735 1.0126 0.9179 0.086 Uiso 1 1 calc R . .
H22C H 0.3324 1.0770 0.9714 0.086 Uiso 1 1 calc R . .
C23 C -0.0416(5) 0.9159(2) 0.9283(3) 0.0709(11) Uani 1 1 d . . .
H23A H 0.0611 0.9136 0.9640 0.106 Uiso 1 1 calc R . .
H23B H -0.0794 0.8723 0.8955 0.106 Uiso 1 1 calc R . .
H23C H -0.0773 0.9280 0.9859 0.106 Uiso 1 1 calc R . .
C24 C -0.3399(4) 0.8889(2) 0.5225(3) 0.0714(12) Uani 1 1 d . . .
H24A H -0.3133 0.8481 0.4940 0.107 Uiso 1 1 calc R . .
H24B H -0.3403 0.9266 0.4735 0.107 Uiso 1 1 calc R . .
H24C H -0.4338 0.8835 0.5218 0.107 Uiso 1 1 calc R . .
 
loop_
 _atom_site_aniso_label
 _atom_site_aniso_U_11
 _atom_site_aniso_U_22
 _atom_site_aniso_U_33
 _atom_site_aniso_U_23
 _atom_site_aniso_U_13
 _atom_site_aniso_U_12
O1 0.0512(13) 0.0463(14) 0.0503(14) 0.0036(11) 0.0216(11) 0.0106(11)
O2 0.0690(17) 0.0669(18) 0.0440(15) 0.0098(13) 0.0187(12) 0.0057(13)
O3 0.0462(13) 0.0541(17) 0.0763(18) -0.0023(13) 0.0261(12) 0.0057(12)
O4 0.0430(13) 0.0764(18) 0.0558(15) -0.0208(13) 0.0274(11) -0.0160(12)
O5 0.112(2) 0.081(2) 0.0705(19) -0.0071(16) 0.0647(18) -0.0134(17)
O6 0.0507(14) 0.0799(18) 0.0488(14) -0.0258(13) 0.0251(11) -0.0125(12)
O7 0.0464(13) 0.0703(17) 0.0484(14) -0.0038(12) 0.0289(11) 0.0058(11)
O8 0.0395(13) 0.0746(18) 0.0515(14) -0.0090(12) 0.0210(11) -0.0101(11)
N1 0.0382(14) 0.0393(16) 0.0414(15) -0.0023(12) 0.0163(11) -0.0007(11)
N2 0.0397(14) 0.0493(17) 0.0418(15) -0.0081(13) 0.0227(12) -0.0054(12)
C1 0.0440(18) 0.047(2) 0.0399(19) -0.0036(16) 0.0155(15) -0.0047(15)
C2 0.0422(17) 0.0399(18) 0.0364(17) -0.0059(14) 0.0195(13) -0.0023(14)
C3 0.0387(16) 0.0363(18) 0.0447(18) -0.0019(14) 0.0189(14) -0.0010(13)
C4 0.0404(17) 0.0424(19) 0.0426(18) -0.0018(15) 0.0195(14) -0.0005(14)
C5 0.0510(19) 0.043(2) 0.0416(18) -0.0038(15) 0.0233(15) 0.0028(15)
C6 0.055(2) 0.052(2) 0.0397(18) -0.0096(16) 0.0245(15) -0.0043(16)
C7 0.0427(17) 0.0435(19) 0.0341(17) -0.0011(14) 0.0162(14) -0.0007(14)
C8 0.070(3) 0.058(2) 0.081(3) -0.009(2) 0.048(2) 0.0073(19)
C9 0.0418(18) 0.057(2) 0.052(2) 0.0014(17) 0.0244(16) 0.0035(16)
C10 0.053(2) 0.058(2) 0.072(3) 0.007(2) 0.0353(19) -0.0058(18)
C11 0.051(2) 0.042(2) 0.061(2) -0.0026(17) 0.0235(17) 0.0016(15)
C12 0.059(2) 0.054(2) 0.086(3) 0.015(2) 0.036(2) 0.0008(19)
C13 0.049(2) 0.058(2) 0.072(3) -0.001(2) 0.0273(18) -0.0069(18)
C14 0.0378(18) 0.048(2) 0.047(2) -0.0031(16) 0.0125(14) -0.0019(15)
C15 0.0457(19) 0.0422(19) 0.0365(17) -0.0020(15) 0.0184(14) -0.0036(15)
C16 0.0400(16) 0.0387(18) 0.0383(17) 0.0006(14) 0.0195(13) 0.0004(14)
C17 0.0371(16) 0.0441(19) 0.0403(18) -0.0045(15) 0.0186(14) -0.0019(14)
C18 0.0405(17) 0.046(2) 0.0366(17) -0.0075(15) 0.0160(14) 0.0027(14)
C19 0.0399(17) 0.047(2) 0.0389(18) 0.0008(15) 0.0232(14) 0.0068(14)
C20 0.0299(15) 0.0421(18) 0.0469(19) 0.0031(15) 0.0184(13) 0.0019(13)
C21 0.0405(17) 0.0450(19) 0.0360(17) -0.0046(14) 0.0147(13) -0.0018(14)
C22 0.047(2) 0.071(3) 0.052(2) -0.0191(19) 0.0172(16) -0.0141(17)
C23 0.087(3) 0.081(3) 0.060(2) 0.007(2) 0.046(2) 0.002(2)
C24 0.044(2) 0.098(3) 0.061(2) 0.001(2) 0.0100(18) -0.020(2)
 
_geom_special_details
;
 All s.u.'s (except the s.u. in the dihedral angle between two l.s. planes)
 are estimated using the full covariance matrix.  The cell s.u.'s are taken
 into account individually in the estimation of s.u.'s in distances, angles
 and torsion angles; correlations between s.u.'s in cell parameters are only
 used when they are defined by crystal symmetry.  An approximate (isotropic)
 treatment of cell s.u.'s is used for estimating s.u.'s involving l.s. planes.
;
 
loop_
 _geom_bond_atom_site_label_1
 _geom_bond_atom_site_label_2
 _geom_bond_distance
 _geom_bond_site_symmetry_2
 _geom_bond_publ_flag
O1 C1 1.350(4) . ?
O1 C5 1.489(4) . ?
O2 C1 1.197(4) . ?
O3 C14 1.237(4) . ?
O4 C15 1.223(4) . ?
O5 C9 1.219(4) . ?
O6 C18 1.354(4) . ?
O6 C22 1.425(4) . ?
O7 C19 1.369(3) . ?
O7 C23 1.440(4) . ?
O8 C20 1.369(3) . ?
O8 C24 1.430(4) . ?
N1 C14 1.353(4) . ?
N1 C7 1.460(4) . ?
N1 C11 1.470(4) . ?
N2 C15 1.353(4) . ?
N2 C2 1.441(4) . ?
N2 H2 0.8600 . ?
C1 C2 1.526(4) . ?
C2 C3 1.494(4) . ?
C2 C7 1.585(4) . ?
C3 C4 1.329(4) . ?
C3 H3 0.9300 . ?
C4 C9 1.488(5) . ?
C4 C5 1.514(5) . ?
C5 C8 1.510(4) . ?
C5 C6 1.534(5) . ?
C6 C7 1.543(4) . ?
C6 H6A 0.9700 . ?
C6 H6B 0.9700 . ?
C7 H7 0.9800 . ?
C8 H8A 0.9600 . ?
C8 H8B 0.9600 . ?
C8 H8C 0.9600 . ?
C9 C10 1.478(5) . ?
C10 H10A 0.9600 . ?
C10 H10B 0.9600 . ?
C10 H10C 0.9600 . ?
C11 C12 1.509(5) . ?
C11 H11A 0.9700 . ?
C11 H11B 0.9700 . ?
C12 C13 1.516(5) . ?
C12 H12A 0.9700 . ?
C12 H12B 0.9700 . ?
C13 C14 1.499(5) . ?
C13 H13A 0.9700 . ?
C13 H13B 0.9700 . ?
C15 C16 1.496(4) . ?
C16 C17 1.392(4) . ?
C16 C21 1.392(4) . ?
C17 C18 1.384(4) . ?
C17 H17 0.9300 . ?
C18 C19 1.400(4) . ?
C19 C20 1.389(4) . ?
C20 C21 1.385(4) . ?
C21 H21 0.9300 . ?
C22 H22A 0.9600 . ?
C22 H22B 0.9600 . ?
C22 H22C 0.9600 . ?
C23 H23A 0.9600 . ?
C23 H23B 0.9600 . ?
C23 H23C 0.9600 . ?
C24 H24A 0.9600 . ?
C24 H24B 0.9600 . ?
C24 H24C 0.9600 . ?
 
loop_
 _geom_angle_atom_site_label_1
 _geom_angle_atom_site_label_2
 _geom_angle_atom_site_label_3
 _geom_angle
 _geom_angle_site_symmetry_1
 _geom_angle_site_symmetry_3
 _geom_angle_publ_flag
C1 O1 C5 115.5(2) . . ?
C18 O6 C22 118.0(2) . . ?
C19 O7 C23 113.5(3) . . ?
C20 O8 C24 117.3(3) . . ?
C14 N1 C7 121.7(3) . . ?
C14 N1 C11 111.5(3) . . ?
C7 N1 C11 125.9(3) . . ?
C15 N2 C2 121.0(3) . . ?
C15 N2 H2 119.5 . . ?
C2 N2 H2 119.5 . . ?
O2 C1 O1 121.1(3) . . ?
O2 C1 C2 127.1(3) . . ?
O1 C1 C2 111.8(3) . . ?
N2 C2 C3 114.6(3) . . ?
N2 C2 C1 113.0(3) . . ?
C3 C2 C1 107.7(2) . . ?
N2 C2 C7 109.9(2) . . ?
C3 C2 C7 107.3(2) . . ?
C1 C2 C7 103.8(2) . . ?
C4 C3 C2 115.9(3) . . ?
C4 C3 H3 122.1 . . ?
C2 C3 H3 122.1 . . ?
C3 C4 C9 122.7(3) . . ?
C3 C4 C5 112.4(3) . . ?
C9 C4 C5 124.4(3) . . ?
O1 C5 C8 104.6(3) . . ?
O1 C5 C4 106.9(2) . . ?
C8 C5 C4 117.3(3) . . ?
O1 C5 C6 105.6(2) . . ?
C8 C5 C6 113.9(3) . . ?
C4 C5 C6 107.5(3) . . ?
C5 C6 C7 110.4(3) . . ?
C5 C6 H6A 109.6 . . ?
C7 C6 H6A 109.6 . . ?
C5 C6 H6B 109.6 . . ?
C7 C6 H6B 109.6 . . ?
H6A C6 H6B 108.1 . . ?
N1 C7 C6 113.9(3) . . ?
N1 C7 C2 111.0(2) . . ?
C6 C7 C2 107.7(2) . . ?
N1 C7 H7 108.0 . . ?
C6 C7 H7 108.0 . . ?
C2 C7 H7 108.0 . . ?
C5 C8 H8A 109.5 . . ?
C5 C8 H8B 109.5 . . ?
H8A C8 H8B 109.5 . . ?
C5 C8 H8C 109.5 . . ?
H8A C8 H8C 109.5 . . ?
H8B C8 H8C 109.5 . . ?
O5 C9 C10 121.3(3) . . ?
O5 C9 C4 120.3(3) . . ?
C10 C9 C4 118.4(3) . . ?
C9 C10 H10A 109.5 . . ?
C9 C10 H10B 109.5 . . ?
H10A C10 H10B 109.5 . . ?
C9 C10 H10C 109.5 . . ?
H10A C10 H10C 109.5 . . ?
H10B C10 H10C 109.5 . . ?
N1 C11 C12 102.7(3) . . ?
N1 C11 H11A 111.2 . . ?
C12 C11 H11A 111.2 . . ?
N1 C11 H11B 111.2 . . ?
C12 C11 H11B 111.2 . . ?
H11A C11 H11B 109.1 . . ?
C11 C12 C13 103.8(3) . . ?
C11 C12 H12A 111.0 . . ?
C13 C12 H12A 111.0 . . ?
C11 C12 H12B 111.0 . . ?
C13 C12 H12B 111.0 . . ?
H12A C12 H12B 109.0 . . ?
C14 C13 C12 102.7(3) . . ?
C14 C13 H13A 111.2 . . ?
C12 C13 H13A 111.2 . . ?
C14 C13 H13B 111.2 . . ?
C12 C13 H13B 111.2 . . ?
H13A C13 H13B 109.1 . . ?
O3 C14 N1 124.2(3) . . ?
O3 C14 C13 126.7(3) . . ?
N1 C14 C13 109.0(3) . . ?
O4 C15 N2 121.8(3) . . ?
O4 C15 C16 121.9(3) . . ?
N2 C15 C16 116.2(3) . . ?
C17 C16 C21 120.1(3) . . ?
C17 C16 C15 116.2(3) . . ?
C21 C16 C15 123.4(3) . . ?
C18 C17 C16 120.2(3) . . ?
C18 C17 H17 119.9 . . ?
C16 C17 H17 119.9 . . ?
O6 C18 C17 125.5(3) . . ?
O6 C18 C19 114.8(3) . . ?
C17 C18 C19 119.6(3) . . ?
O7 C19 C20 120.5(3) . . ?
O7 C19 C18 119.7(3) . . ?
C20 C19 C18 119.7(3) . . ?
O8 C20 C21 124.4(3) . . ?
O8 C20 C19 115.2(3) . . ?
C21 C20 C19 120.4(3) . . ?
C20 C21 C16 119.6(3) . . ?
C20 C21 H21 120.2 . . ?
C16 C21 H21 120.2 . . ?
O6 C22 H22A 109.5 . . ?
O6 C22 H22B 109.5 . . ?
H22A C22 H22B 109.5 . . ?
O6 C22 H22C 109.5 . . ?
H22A C22 H22C 109.5 . . ?
H22B C22 H22C 109.5 . . ?
O7 C23 H23A 109.5 . . ?
O7 C23 H23B 109.5 . . ?
H23A C23 H23B 109.5 . . ?
O7 C23 H23C 109.5 . . ?
H23A C23 H23C 109.5 . . ?
H23B C23 H23C 109.5 . . ?
O8 C24 H24A 109.5 . . ?
O8 C24 H24B 109.5 . . ?
H24A C24 H24B 109.5 . . ?
O8 C24 H24C 109.5 . . ?
H24A C24 H24C 109.5 . . ?
H24B C24 H24C 109.5 . . ?
 
loop_
 _geom_torsion_atom_site_label_1
 _geom_torsion_atom_site_label_2
 _geom_torsion_atom_site_label_3
 _geom_torsion_atom_site_label_4
 _geom_torsion
 _geom_torsion_site_symmetry_1
 _geom_torsion_site_symmetry_2
 _geom_torsion_site_symmetry_3
 _geom_torsion_site_symmetry_4
 _geom_torsion_publ_flag
C5 O1 C1 O2 174.0(3) . . . . ?
C5 O1 C1 C2 -4.3(4) . . . . ?
C15 N2 C2 C3 -58.8(4) . . . . ?
C15 N2 C2 C1 65.0(4) . . . . ?
C15 N2 C2 C7 -179.7(3) . . . . ?
O2 C1 C2 N2 4.8(5) . . . . ?
O1 C1 C2 N2 -177.1(2) . . . . ?
O2 C1 C2 C3 132.3(3) . . . . ?
O1 C1 C2 C3 -49.6(3) . . . . ?
O2 C1 C2 C7 -114.2(4) . . . . ?
O1 C1 C2 C7 63.9(3) . . . . ?
N2 C2 C3 C4 -179.8(3) . . . . ?
C1 C2 C3 C4 53.7(4) . . . . ?
C7 C2 C3 C4 -57.4(4) . . . . ?
C2 C3 C4 C9 171.2(3) . . . . ?
C2 C3 C4 C5 -1.6(4) . . . . ?
C1 O1 C5 C8 -178.7(3) . . . . ?
C1 O1 C5 C4 56.2(3) . . . . ?
C1 O1 C5 C6 -58.1(3) . . . . ?
C3 C4 C5 O1 -52.5(3) . . . . ?
C9 C4 C5 O1 134.9(3) . . . . ?
C3 C4 C5 C8 -169.6(3) . . . . ?
C9 C4 C5 C8 17.8(5) . . . . ?
C3 C4 C5 C6 60.5(3) . . . . ?
C9 C4 C5 C6 -112.1(3) . . . . ?
O1 C5 C6 C7 57.4(3) . . . . ?
C8 C5 C6 C7 171.7(3) . . . . ?
C4 C5 C6 C7 -56.5(3) . . . . ?
C14 N1 C7 C6 -147.4(3) . . . . ?
C11 N1 C7 C6 20.6(4) . . . . ?
C14 N1 C7 C2 90.9(3) . . . . ?
C11 N1 C7 C2 -101.2(3) . . . . ?
C5 C6 C7 N1 -123.6(3) . . . . ?
C5 C6 C7 C2 0.0(4) . . . . ?
N2 C2 C7 N1 -54.4(3) . . . . ?
C3 C2 C7 N1 -179.5(2) . . . . ?
C1 C2 C7 N1 66.7(3) . . . . ?
N2 C2 C7 C6 -179.7(2) . . . . ?
C3 C2 C7 C6 55.1(3) . . . . ?
C1 C2 C7 C6 -58.7(3) . . . . ?
C3 C4 C9 O5 -149.3(4) . . . . ?
C5 C4 C9 O5 22.6(5) . . . . ?
C3 C4 C9 C10 28.2(5) . . . . ?
C5 C4 C9 C10 -159.9(3) . . . . ?
C14 N1 C11 C12 -20.0(4) . . . . ?
C7 N1 C11 C12 170.9(3) . . . . ?
N1 C11 C12 C13 30.6(4) . . . . ?
C11 C12 C13 C14 -30.3(4) . . . . ?
C7 N1 C14 O3 -12.8(5) . . . . ?
C11 N1 C14 O3 177.7(3) . . . . ?
C7 N1 C14 C13 170.2(3) . . . . ?
C11 N1 C14 C13 0.6(4) . . . . ?
C12 C13 C14 O3 -158.0(4) . . . . ?
C12 C13 C14 N1 19.0(4) . . . . ?
C2 N2 C15 O4 5.1(5) . . . . ?
C2 N2 C15 C16 -172.5(3) . . . . ?
O4 C15 C16 C17 2.8(5) . . . . ?
N2 C15 C16 C17 -179.6(3) . . . . ?
O4 C15 C16 C21 -172.1(3) . . . . ?
N2 C15 C16 C21 5.6(5) . . . . ?
C21 C16 C17 C18 3.0(5) . . . . ?
C15 C16 C17 C18 -172.1(3) . . . . ?
C22 O6 C18 C17 -1.8(5) . . . . ?
C22 O6 C18 C19 177.7(3) . . . . ?
C16 C17 C18 O6 -179.4(3) . . . . ?
C16 C17 C18 C19 1.1(5) . . . . ?
C23 O7 C19 C20 95.7(4) . . . . ?
C23 O7 C19 C18 -87.2(4) . . . . ?
O6 C18 C19 O7 -2.3(4) . . . . ?
C17 C18 C19 O7 177.2(3) . . . . ?
O6 C18 C19 C20 174.8(3) . . . . ?
C17 C18 C19 C20 -5.7(5) . . . . ?
C24 O8 C20 C21 -23.3(5) . . . . ?
C24 O8 C20 C19 158.2(3) . . . . ?
O7 C19 C20 O8 1.9(4) . . . . ?
C18 C19 C20 O8 -175.2(3) . . . . ?
O7 C19 C20 C21 -176.7(3) . . . . ?
C18 C19 C20 C21 6.2(5) . . . . ?
O8 C20 C21 C16 179.4(3) . . . . ?
C19 C20 C21 C16 -2.1(5) . . . . ?
C17 C16 C21 C20 -2.5(5) . . . . ?
C15 C16 C21 C20 172.1(3) . . . . ?
 
loop_
 _geom_hbond_atom_site_label_D
 _geom_hbond_atom_site_label_H
 _geom_hbond_atom_site_label_A
 _geom_hbond_distance_DH
 _geom_hbond_distance_HA
 _geom_hbond_distance_DA
 _geom_hbond_angle_DHA
 _geom_hbond_site_symmetry_A
N2 H2 O3  0.86 2.10 2.891(3) 152.9 .
 
_diffrn_measured_fraction_theta_max    0.991
_diffrn_reflns_theta_full              25.37
_diffrn_measured_fraction_theta_full   0.991
_refine_diff_density_max    0.182
_refine_diff_density_min   -0.212
_refine_diff_density_rms    0.047
