# Supplementary material
Source: MDPI journal article supplement (https://www.mdpi.com/2073-8994/12/10/1714)
Supplement: s1 [file s1 › exo-3f.cif]

data_exo-3f

_publ_contact_author_name 'Franc Perdih'
_publ_contact_author_address
;
Faculty of Chemistry and Chemical Technology
University of Ljubljana
Ve\<cna pot 113, P. O. Box 537
SI-1000 Ljubljana
Slovenia
;

_publ_contact_author_email franc.perdih@fkkt.uni-lj.si

loop_
_publ_author_name
_publ_author_address

'Kri\<stof Kranjc'
;
Faculty of Chemistry and Chemical Technology
University of Ljubljana
Ve\<cna pot 113, P. O. Box 537
SI-1000 Ljubljana
Slovenia
;

'Amadej Juranovi\<c'
;
Faculty of Chemistry and Chemical Technology
University of Ljubljana
Ve\<cna pot 113, P. O. Box 537
SI-1000 Ljubljana
Slovenia
;

'Marijan Ko\<cevar'
;
Faculty of Chemistry and Chemical Technology
University of Ljubljana
Ve\<cna pot 113, P. O. Box 537
SI-1000 Ljubljana
Slovenia
;

'Franc Perdih'
;
Faculty of Chemistry and Chemical Technology
University of Ljubljana
Ve\<cna pot 113, P. O. Box 537
SI-1000 Ljubljana
Slovenia
;

_publ_requested_journal          'Symmetry' 
_publ_section_title
;
Supramolecular Diversity of Oxabicyclo[2.2.2]octenes Formed Between Substitued 2H-Pyran-2-ones and 
Vinyl-moiety-containing Dienophiles
;
 
_audit_creation_method            SHELXL-97
_chemical_name_systematic
;
 ?
;
_chemical_name_common             ?
_chemical_melting_point           ?
_chemical_formula_moiety          'C26 H24 N2 O5'
_chemical_formula_sum             'C26 H24 N2 O5'
_chemical_formula_weight          444.47
 
loop_
 _atom_type_symbol
 _atom_type_description
 _atom_type_scat_dispersion_real
 _atom_type_scat_dispersion_imag
 _atom_type_scat_source
 'C'  'C'   0.0033   0.0016
 'International Tables Vol C Tables 4.2.6.8 and 6.1.1.4'
 'H'  'H'   0.0000   0.0000
 'International Tables Vol C Tables 4.2.6.8 and 6.1.1.4'
 'N'  'N'   0.0061   0.0033
 'International Tables Vol C Tables 4.2.6.8 and 6.1.1.4'
 'O'  'O'   0.0106   0.0060
 'International Tables Vol C Tables 4.2.6.8 and 6.1.1.4'
 
_symmetry_cell_setting            triclinic
_symmetry_space_group_name_H-M    P-1
_symmetry_space_group_name_Hall   '-P 1'
 
loop_
 _symmetry_equiv_pos_as_xyz
 'x, y, z'
 '-x, -y, -z'
 
_cell_length_a                    9.2483(3)
_cell_length_b                    11.4819(3)
_cell_length_c                    12.1508(3)
_cell_angle_alpha                 112.763(2)
_cell_angle_beta                  93.341(2)
_cell_angle_gamma                 106.199(2)
_cell_volume                      1122.23(5)
_cell_formula_units_Z             2
_cell_measurement_temperature     293(2)
_cell_measurement_reflns_used     5049
_cell_measurement_theta_min       2.55
_cell_measurement_theta_max       27.48
 
_exptl_crystal_description        prism
_exptl_crystal_colour             colorless
_exptl_crystal_size_max           0.60
_exptl_crystal_size_mid           0.30
_exptl_crystal_size_min           0.18
_exptl_crystal_density_meas       ?
_exptl_crystal_density_diffrn     1.315
_exptl_crystal_density_method     'not measured'
_exptl_crystal_F_000              468
_exptl_absorpt_coefficient_mu     0.092
_exptl_absorpt_correction_type    multi-scan
_exptl_absorpt_correction_T_min   0.9469
_exptl_absorpt_correction_T_max   0.9836
_exptl_absorpt_process_details    'SCALEPACK (Otwinowski & Minor, 1997)'
 
_exptl_special_details
;
220 frames in 5 sets of \w scans. Rotation/frame = 2.0 \%.
Crystal-detector distance = 25.0 mm. Measuring time  = 30 s/\%.
;
 
_diffrn_ambient_temperature       293(2)
_diffrn_radiation_wavelength      0.71073
_diffrn_radiation_type            MoK\a
_diffrn_radiation_source          'fine-focus sealed tube'
_diffrn_radiation_monochromator   graphite
_diffrn_measurement_device_type   
;
Nonius KappaCCD area-detector diffractometer
;
_diffrn_measurement_method        '\w scans'
_diffrn_detector_area_resol_mean  0.055
_diffrn_standards_number          ?
_diffrn_standards_interval_count  ?
_diffrn_standards_interval_time   ?
_diffrn_standards_decay_%         ?
_diffrn_reflns_number             8995
_diffrn_reflns_av_R_equivalents   0.0271
_diffrn_reflns_av_sigmaI/netI     0.0351
_diffrn_reflns_limit_h_min        -12
_diffrn_reflns_limit_h_max        12
_diffrn_reflns_limit_k_min        -14
_diffrn_reflns_limit_k_max        14
_diffrn_reflns_limit_l_min        -15
_diffrn_reflns_limit_l_max        13
_diffrn_reflns_theta_min          3.98
_diffrn_reflns_theta_max          27.52
_reflns_number_total              5103
_reflns_number_gt                 3735
_reflns_threshold_expression      >2\s(I)
 

_computing_data_collection        'KappaCCD Reference Manual (Nonius, 1998)'
_computing_cell_refinement        'DENZO-SMN (Otwinowski & Minor, 1997)'
_computing_data_reduction         'DENZO-SMN (Otwinowski & Minor, 1997)'
_computing_structure_solution     'SHELXS-97 (Sheldrick, 1997)'
_computing_structure_refinement   'SHELXL-97 (Sheldrick, 1997)'
_computing_molecular_graphics     'ORTEP-3 for Windows version 2.02 (Farrugia, 2008)'
_computing_publication_material   'WinGX publication routines (Farrugia, 1999)'
 
_refine_special_details
;
 Refinement of F^2^ against ALL reflections.  The weighted R-factor wR and
 goodness of fit S are based on F^2^, conventional R-factors R are based
 on F, with F set to zero for negative F^2^. The threshold expression of
 F^2^ > 2\s(F^2^) is used only for calculating R-factors(gt) etc. and is
 not relevant to the choice of reflections for refinement.  R-factors based
 on F^2^ are statistically about twice as large as those based on F, and R-
 factors based on ALL data will be even larger.
;
 
_refine_ls_structure_factor_coef  Fsqd
_refine_ls_matrix_type            full
_refine_ls_weighting_scheme       calc
_refine_ls_weighting_details
 'calc w=1/[\s^2^(Fo^2^)+(0.0664P)^2^+0.4120P] where P=(Fo^2^+2Fc^2^)/3'
_atom_sites_solution_primary      direct
_atom_sites_solution_secondary    difmap
_atom_sites_solution_hydrogens    geom
_refine_ls_hydrogen_treatment     constr
_refine_ls_extinction_method      none
_refine_ls_extinction_coef        ?
_refine_ls_number_reflns          5103
_refine_ls_number_parameters      300
_refine_ls_number_restraints      0
_refine_ls_R_factor_all           0.0768
_refine_ls_R_factor_gt            0.0535
_refine_ls_wR_factor_ref          0.1547
_refine_ls_wR_factor_gt           0.1356
_refine_ls_goodness_of_fit_ref    1.025
_refine_ls_restrained_S_all       1.025
_refine_ls_shift/su_max           0.000
_refine_ls_shift/su_mean          0.000
 
loop_
 _atom_site_label
 _atom_site_type_symbol
 _atom_site_fract_x
 _atom_site_fract_y
 _atom_site_fract_z
 _atom_site_U_iso_or_equiv
 _atom_site_adp_type
 _atom_site_occupancy
 _atom_site_symmetry_multiplicity
 _atom_site_calc_flag
 _atom_site_refinement_flags
 _atom_site_disorder_assembly
 _atom_site_disorder_group
N1 N 0.67257(16) 0.51100(14) 0.85923(12) 0.0428(3) Uani 1 1 d . . .
H1 H 0.6540 0.5173 0.9295 0.064 Uiso 1 1 calc R . .
N2 N 0.4726(2) 0.62625(15) 0.77666(13) 0.0500(4) Uani 1 1 d . . .
O1 O 0.41650(15) 0.35663(13) 0.89506(10) 0.0472(3) Uani 1 1 d . . .
O2 O 0.30326(13) 0.26566(12) 0.70207(10) 0.0414(3) Uani 1 1 d . . .
O3 O 0.85339(19) 0.57056(17) 0.75612(13) 0.0760(5) Uani 1 1 d . . .
O4 O 0.6613(3) 0.76747(16) 0.73144(19) 0.0930(6) Uani 1 1 d . . .
O5 O 0.39590(16) 0.01944(13) 0.40729(12) 0.0569(4) Uani 1 1 d . . .
C1 C 0.41982(19) 0.34825(15) 0.79328(14) 0.0361(3) Uani 1 1 d . . .
C2 C 0.55255(18) 0.42616(15) 0.75487(13) 0.0360(3) Uani 1 1 d . . .
C3 C 0.4917(2) 0.50477(16) 0.69099(14) 0.0429(4) Uani 1 1 d . . .
H3 H 0.5697 0.5312 0.6462 0.051 Uiso 1 1 calc R . .
C4 C 0.3471(2) 0.40649(18) 0.59652(16) 0.0493(4) Uani 1 1 d . . .
H4A H 0.2581 0.4303 0.6226 0.059 Uiso 1 1 calc R . .
H4B H 0.3556 0.4117 0.5193 0.059 Uiso 1 1 calc R . .
C5 C 0.3266(2) 0.26379(17) 0.58110(14) 0.0406(4) Uani 1 1 d . . .
C6 C 0.47827(19) 0.23875(16) 0.56077(13) 0.0373(4) Uani 1 1 d . . .
C7 C 0.59338(19) 0.32118(16) 0.65310(13) 0.0373(4) Uani 1 1 d . . .
H7 H 0.6914 0.3147 0.6549 0.045 Uiso 1 1 calc R . .
C8 C 0.8131(2) 0.58136(19) 0.85248(16) 0.0524(5) Uani 1 1 d . . .
C9 C 0.9153(2) 0.6709(2) 0.9735(2) 0.0662(7) Uani 1 1 d . . .
C10 C 0.9961(3) 0.8013(3) 0.9959(3) 0.1164(14) Uani 1 1 d . . .
H10 H 0.9872 0.8325 0.9366 0.140 Uiso 1 1 calc R . .
C11 C 1.0912(5) 0.8852(5) 1.1086(5) 0.176(3) Uani 1 1 d . . .
H11 H 1.1464 0.9731 1.1250 0.212 Uiso 1 1 calc R . .
C12 C 1.1030(4) 0.8384(7) 1.1945(5) 0.186(4) Uani 1 1 d . . .
H12 H 1.1663 0.8959 1.2694 0.223 Uiso 1 1 calc R . .
C13 C 1.0232(4) 0.7066(6) 1.1742(3) 0.141(2) Uani 1 1 d . . .
H13 H 1.0340 0.6754 1.2333 0.170 Uiso 1 1 calc R . .
C14 C 0.9280(3) 0.6251(4) 1.0629(2) 0.0884(9) Uani 1 1 d . . .
H14 H 0.8712 0.5377 1.0473 0.106 Uiso 1 1 calc R . .
C15 C 0.5652(3) 0.7483(2) 0.7921(2) 0.0625(6) Uani 1 1 d . . .
C16 C 0.5239(4) 0.8524(2) 0.8933(2) 0.0850(8) Uani 1 1 d . . .
H16A H 0.6111 0.9062 0.9595 0.102 Uiso 1 1 calc R . .
H16B H 0.4919 0.9109 0.8645 0.102 Uiso 1 1 calc R . .
C17 C 0.3971(4) 0.7790(3) 0.9340(3) 0.0953(10) Uani 1 1 d . . .
H17A H 0.3070 0.8040 0.9237 0.114 Uiso 1 1 calc R . .
H17B H 0.4259 0.8002 1.0193 0.114 Uiso 1 1 calc R . .
C18 C 0.3631(3) 0.6316(2) 0.85827(19) 0.0600(5) Uani 1 1 d . . .
H18A H 0.3779 0.5866 0.9090 0.072 Uiso 1 1 calc R . .
H18B H 0.2587 0.5903 0.8130 0.072 Uiso 1 1 calc R . .
C19 C 0.1822(2) 0.1622(2) 0.49472(17) 0.0565(5) Uani 1 1 d . . .
H19A H 0.1682 0.0774 0.4976 0.085 Uiso 1 1 calc R . .
H19B H 0.1902 0.1534 0.4137 0.085 Uiso 1 1 calc R . .
H19C H 0.0961 0.1909 0.5178 0.085 Uiso 1 1 calc R . .
C20 C 0.4958(2) 0.12816(16) 0.45190(14) 0.0400(4) Uani 1 1 d . . .
C21 C 0.6395(2) 0.15180(18) 0.40220(15) 0.0442(4) Uani 1 1 d . . .
C22 C 0.7358(2) 0.2776(2) 0.42156(18) 0.0545(5) Uani 1 1 d . . .
H22 H 0.7129 0.3533 0.4696 0.065 Uiso 1 1 calc R . .
C23 C 0.8655(3) 0.2914(3) 0.3700(2) 0.0703(6) Uani 1 1 d . . .
H23 H 0.9281 0.3760 0.3824 0.084 Uiso 1 1 calc R . .
C24 C 0.9022(3) 0.1809(3) 0.3009(2) 0.0787(8) Uani 1 1 d . . .
H24 H 0.9906 0.1906 0.2677 0.094 Uiso 1 1 calc R . .
C25 C 0.8084(3) 0.0561(3) 0.2808(2) 0.0789(8) Uani 1 1 d . . .
H25 H 0.8331 -0.0188 0.2336 0.095 Uiso 1 1 calc R . .
C26 C 0.6771(3) 0.0407(2) 0.33012(19) 0.0615(5) Uani 1 1 d . . .
H26 H 0.6135 -0.0446 0.3150 0.074 Uiso 1 1 calc R . .
 
loop_
 _atom_site_aniso_label
 _atom_site_aniso_U_11
 _atom_site_aniso_U_22
 _atom_site_aniso_U_33
 _atom_site_aniso_U_23
 _atom_site_aniso_U_13
 _atom_site_aniso_U_12
N1 0.0413(7) 0.0424(8) 0.0278(6) 0.0051(6) 0.0050(5) 0.0032(6)
N2 0.0737(11) 0.0359(8) 0.0402(8) 0.0124(6) 0.0159(7) 0.0219(7)
O1 0.0541(7) 0.0485(7) 0.0333(6) 0.0155(5) 0.0093(5) 0.0107(6)
O2 0.0385(6) 0.0415(6) 0.0337(6) 0.0093(5) 0.0049(5) 0.0075(5)
O3 0.0738(10) 0.0723(10) 0.0503(8) 0.0113(7) 0.0269(8) -0.0048(8)
O4 0.1262(16) 0.0455(9) 0.1015(14) 0.0290(9) 0.0522(13) 0.0162(10)
O5 0.0559(8) 0.0390(7) 0.0521(8) 0.0004(6) 0.0012(6) 0.0096(6)
C1 0.0403(8) 0.0319(8) 0.0308(7) 0.0084(6) 0.0052(6) 0.0115(6)
C2 0.0400(8) 0.0320(8) 0.0263(7) 0.0060(6) 0.0037(6) 0.0071(6)
C3 0.0628(11) 0.0339(8) 0.0314(8) 0.0114(7) 0.0123(7) 0.0178(8)
C4 0.0651(12) 0.0474(10) 0.0355(8) 0.0128(7) 0.0025(8) 0.0266(9)
C5 0.0433(9) 0.0419(9) 0.0284(7) 0.0073(6) 0.0013(6) 0.0139(7)
C6 0.0427(9) 0.0333(8) 0.0303(7) 0.0085(6) 0.0055(6) 0.0112(7)
C7 0.0396(8) 0.0350(8) 0.0316(7) 0.0090(6) 0.0075(6) 0.0109(7)
C8 0.0482(10) 0.0451(10) 0.0414(9) 0.0035(8) 0.0123(8) 0.0024(8)
C9 0.0380(10) 0.0634(13) 0.0508(11) -0.0114(10) 0.0117(8) -0.0013(9)
C10 0.0813(19) 0.0696(17) 0.108(2) -0.0234(16) 0.0383(17) -0.0251(14)
C11 0.080(2) 0.115(3) 0.159(4) -0.077(3) 0.046(3) -0.037(2)
C12 0.0500(17) 0.221(6) 0.111(3) -0.093(4) -0.012(2) 0.028(3)
C13 0.076(2) 0.213(5) 0.0648(18) -0.021(2) -0.0216(16) 0.067(3)
C14 0.0528(13) 0.122(2) 0.0520(13) 0.0001(14) -0.0044(10) 0.0275(14)
C15 0.0939(17) 0.0359(10) 0.0534(11) 0.0146(9) 0.0145(11) 0.0210(10)
C16 0.131(2) 0.0434(12) 0.0679(15) 0.0070(11) 0.0210(16) 0.0334(14)
C17 0.138(3) 0.0613(15) 0.0840(18) 0.0109(14) 0.0455(19) 0.0515(17)
C18 0.0822(15) 0.0538(12) 0.0500(11) 0.0182(9) 0.0244(10) 0.0338(11)
C19 0.0435(10) 0.0619(12) 0.0430(10) 0.0039(9) -0.0037(8) 0.0149(9)
C20 0.0467(9) 0.0347(8) 0.0312(7) 0.0070(6) 0.0019(7) 0.0134(7)
C21 0.0530(10) 0.0481(10) 0.0331(8) 0.0145(7) 0.0094(7) 0.0221(8)
C22 0.0607(12) 0.0548(11) 0.0465(10) 0.0206(9) 0.0140(9) 0.0170(9)
C23 0.0634(14) 0.0906(18) 0.0644(13) 0.0421(13) 0.0210(11) 0.0209(13)
C24 0.0712(15) 0.124(2) 0.0710(15) 0.0569(16) 0.0336(13) 0.0497(17)
C25 0.0943(19) 0.103(2) 0.0708(15) 0.0405(15) 0.0410(14) 0.0677(18)
C26 0.0802(15) 0.0595(12) 0.0545(11) 0.0213(10) 0.0254(11) 0.0387(11)
 
_geom_special_details
;
 All s.u.'s (except the s.u. in the dihedral angle between two l.s. planes)
 are estimated using the full covariance matrix.  The cell s.u.'s are taken
 into account individually in the estimation of s.u.'s in distances, angles
 and torsion angles; correlations between s.u.'s in cell parameters are only
 used when they are defined by crystal symmetry.  An approximate (isotropic)
 treatment of cell s.u.'s is used for estimating s.u.'s involving l.s. planes.
;
 
loop_
 _geom_bond_atom_site_label_1
 _geom_bond_atom_site_label_2
 _geom_bond_distance
 _geom_bond_site_symmetry_2
 _geom_bond_publ_flag
N1 C8 1.352(2) . ?
N1 C2 1.4372(19) . ?
N1 H1 0.8600 . ?
N2 C15 1.357(3) . ?
N2 C3 1.447(2) . ?
N2 C18 1.455(3) . ?
O1 C1 1.2056(19) . ?
O2 C1 1.3292(19) . ?
O2 C5 1.4908(19) . ?
O3 C8 1.220(2) . ?
O4 C15 1.213(3) . ?
O5 C20 1.217(2) . ?
C1 C2 1.517(2) . ?
C2 C7 1.510(2) . ?
C2 C3 1.584(2) . ?
C3 C4 1.535(3) . ?
C3 H3 0.9800 . ?
C4 C5 1.530(3) . ?
C4 H4A 0.9700 . ?
C4 H4B 0.9700 . ?
C5 C19 1.505(2) . ?
C5 C6 1.524(2) . ?
C6 C7 1.328(2) . ?
C6 C20 1.493(2) . ?
C7 H7 0.9300 . ?
C8 C9 1.496(3) . ?
C9 C10 1.382(4) . ?
C9 C14 1.389(4) . ?
C10 C11 1.394(6) . ?
C10 H10 0.9300 . ?
C11 C12 1.357(9) . ?
C11 H11 0.9300 . ?
C12 C13 1.400(9) . ?
C12 H12 0.9300 . ?
C13 C14 1.380(4) . ?
C13 H13 0.9300 . ?
C14 H14 0.9300 . ?
C15 C16 1.504(3) . ?
C16 C17 1.473(4) . ?
C16 H16A 0.9700 . ?
C16 H16B 0.9700 . ?
C17 C18 1.508(3) . ?
C17 H17A 0.9700 . ?
C17 H17B 0.9700 . ?
C18 H18A 0.9700 . ?
C18 H18B 0.9700 . ?
C19 H19A 0.9600 . ?
C19 H19B 0.9600 . ?
C19 H19C 0.9600 . ?
C20 C21 1.491(3) . ?
C21 C22 1.390(3) . ?
C21 C26 1.391(3) . ?
C22 C23 1.383(3) . ?
C22 H22 0.9300 . ?
C23 C24 1.371(4) . ?
C23 H23 0.9300 . ?
C24 C25 1.369(4) . ?
C24 H24 0.9300 . ?
C25 C26 1.383(3) . ?
C25 H25 0.9300 . ?
C26 H26 0.9300 . ?
 
loop_
 _geom_angle_atom_site_label_1
 _geom_angle_atom_site_label_2
 _geom_angle_atom_site_label_3
 _geom_angle
 _geom_angle_site_symmetry_1
 _geom_angle_site_symmetry_3
 _geom_angle_publ_flag
C8 N1 C2 123.29(14) . . ?
C8 N1 H1 118.4 . . ?
C2 N1 H1 118.4 . . ?
C15 N2 C3 121.23(17) . . ?
C15 N2 C18 113.77(16) . . ?
C3 N2 C18 124.89(16) . . ?
C1 O2 C5 115.10(12) . . ?
O1 C1 O2 121.50(15) . . ?
O1 C1 C2 125.18(15) . . ?
O2 C1 C2 113.31(13) . . ?
N1 C2 C7 115.76(14) . . ?
N1 C2 C1 108.95(12) . . ?
C7 C2 C1 104.92(13) . . ?
N1 C2 C3 113.69(13) . . ?
C7 C2 C3 104.01(12) . . ?
C1 C2 C3 108.99(14) . . ?
N2 C3 C4 114.60(16) . . ?
N2 C3 C2 112.98(13) . . ?
C4 C3 C2 107.94(13) . . ?
N2 C3 H3 107.0 . . ?
C4 C3 H3 107.0 . . ?
C2 C3 H3 107.0 . . ?
C5 C4 C3 110.16(14) . . ?
C5 C4 H4A 109.6 . . ?
C3 C4 H4A 109.6 . . ?
C5 C4 H4B 109.6 . . ?
C3 C4 H4B 109.6 . . ?
H4A C4 H4B 108.1 . . ?
O2 C5 C19 104.67(14) . . ?
O2 C5 C6 106.78(13) . . ?
C19 C5 C6 118.39(14) . . ?
O2 C5 C4 104.73(13) . . ?
C19 C5 C4 113.35(16) . . ?
C6 C5 C4 107.81(15) . . ?
C7 C6 C20 122.71(15) . . ?
C7 C6 C5 113.22(14) . . ?
C20 C6 C5 123.98(14) . . ?
C6 C7 C2 114.75(15) . . ?
C6 C7 H7 122.6 . . ?
C2 C7 H7 122.6 . . ?
O3 C8 N1 122.81(17) . . ?
O3 C8 C9 123.31(18) . . ?
N1 C8 C9 113.87(16) . . ?
C10 C9 C14 120.2(3) . . ?
C10 C9 C8 118.8(3) . . ?
C14 C9 C8 121.0(2) . . ?
C9 C10 C11 119.0(5) . . ?
C9 C10 H10 120.5 . . ?
C11 C10 H10 120.5 . . ?
C12 C11 C10 119.9(5) . . ?
C12 C11 H11 120.0 . . ?
C10 C11 H11 120.0 . . ?
C11 C12 C13 122.3(4) . . ?
C11 C12 H12 118.8 . . ?
C13 C12 H12 118.8 . . ?
C14 C13 C12 117.2(5) . . ?
C14 C13 H13 121.4 . . ?
C12 C13 H13 121.4 . . ?
C13 C14 C9 121.3(4) . . ?
C13 C14 H14 119.4 . . ?
C9 C14 H14 119.4 . . ?
O4 C15 N2 124.91(19) . . ?
O4 C15 C16 127.0(2) . . ?
N2 C15 C16 108.0(2) . . ?
C17 C16 C15 106.2(2) . . ?
C17 C16 H16A 110.5 . . ?
C15 C16 H16A 110.5 . . ?
C17 C16 H16B 110.5 . . ?
C15 C16 H16B 110.5 . . ?
H16A C16 H16B 108.7 . . ?
C16 C17 C18 107.9(2) . . ?
C16 C17 H17A 110.1 . . ?
C18 C17 H17A 110.1 . . ?
C16 C17 H17B 110.1 . . ?
C18 C17 H17B 110.1 . . ?
H17A C17 H17B 108.4 . . ?
N2 C18 C17 104.1(2) . . ?
N2 C18 H18A 110.9 . . ?
C17 C18 H18A 110.9 . . ?
N2 C18 H18B 110.9 . . ?
C17 C18 H18B 110.9 . . ?
H18A C18 H18B 109.0 . . ?
C5 C19 H19A 109.5 . . ?
C5 C19 H19B 109.5 . . ?
H19A C19 H19B 109.5 . . ?
C5 C19 H19C 109.5 . . ?
H19A C19 H19C 109.5 . . ?
H19B C19 H19C 109.5 . . ?
O5 C20 C21 120.91(15) . . ?
O5 C20 C6 120.06(16) . . ?
C21 C20 C6 118.98(15) . . ?
C22 C21 C26 118.31(19) . . ?
C22 C21 C20 123.92(16) . . ?
C26 C21 C20 117.75(18) . . ?
C23 C22 C21 120.6(2) . . ?
C23 C22 H22 119.7 . . ?
C21 C22 H22 119.7 . . ?
C24 C23 C22 120.4(3) . . ?
C24 C23 H23 119.8 . . ?
C22 C23 H23 119.8 . . ?
C25 C24 C23 119.8(2) . . ?
C25 C24 H24 120.1 . . ?
C23 C24 H24 120.1 . . ?
C24 C25 C26 120.5(2) . . ?
C24 C25 H25 119.7 . . ?
C26 C25 H25 119.7 . . ?
C25 C26 C21 120.5(2) . . ?
C25 C26 H26 119.8 . . ?
C21 C26 H26 119.8 . . ?
 
loop_
 _geom_torsion_atom_site_label_1
 _geom_torsion_atom_site_label_2
 _geom_torsion_atom_site_label_3
 _geom_torsion_atom_site_label_4
 _geom_torsion
 _geom_torsion_site_symmetry_1
 _geom_torsion_site_symmetry_2
 _geom_torsion_site_symmetry_3
 _geom_torsion_site_symmetry_4
 _geom_torsion_publ_flag
C5 O2 C1 O1 -178.26(15) . . . . ?
C5 O2 C1 C2 1.12(19) . . . . ?
C8 N1 C2 C7 54.1(2) . . . . ?
C8 N1 C2 C1 172.00(17) . . . . ?
C8 N1 C2 C3 -66.2(2) . . . . ?
O1 C1 C2 N1 -0.1(2) . . . . ?
O2 C1 C2 N1 -179.42(13) . . . . ?
O1 C1 C2 C7 124.48(17) . . . . ?
O2 C1 C2 C7 -54.88(17) . . . . ?
O1 C1 C2 C3 -124.63(17) . . . . ?
O2 C1 C2 C3 56.01(17) . . . . ?
C15 N2 C3 C4 -124.8(2) . . . . ?
C18 N2 C3 C4 59.2(2) . . . . ?
C15 N2 C3 C2 111.0(2) . . . . ?
C18 N2 C3 C2 -65.0(2) . . . . ?
N1 C2 C3 N2 -42.4(2) . . . . ?
C7 C2 C3 N2 -169.19(15) . . . . ?
C1 C2 C3 N2 79.30(17) . . . . ?
N1 C2 C3 C4 -170.20(14) . . . . ?
C7 C2 C3 C4 63.04(17) . . . . ?
C1 C2 C3 C4 -48.46(17) . . . . ?
N2 C3 C4 C5 -136.26(16) . . . . ?
C2 C3 C4 C5 -9.42(19) . . . . ?
C1 O2 C5 C19 178.87(14) . . . . ?
C1 O2 C5 C6 52.55(17) . . . . ?
C1 O2 C5 C4 -61.63(17) . . . . ?
C3 C4 C5 O2 63.35(18) . . . . ?
C3 C4 C5 C19 176.86(15) . . . . ?
C3 C4 C5 C6 -50.09(18) . . . . ?
O2 C5 C6 C7 -51.24(18) . . . . ?
C19 C5 C6 C7 -168.87(17) . . . . ?
C4 C5 C6 C7 60.83(18) . . . . ?
O2 C5 C6 C20 125.36(16) . . . . ?
C19 C5 C6 C20 7.7(3) . . . . ?
C4 C5 C6 C20 -122.57(17) . . . . ?
C20 C6 C7 C2 -179.79(15) . . . . ?
C5 C6 C7 C2 -3.1(2) . . . . ?
N1 C2 C7 C6 176.12(15) . . . . ?
C1 C2 C7 C6 56.02(18) . . . . ?
C3 C2 C7 C6 -58.41(18) . . . . ?
C2 N1 C8 O3 -5.8(3) . . . . ?
C2 N1 C8 C9 175.50(18) . . . . ?
O3 C8 C9 C10 47.9(3) . . . . ?
N1 C8 C9 C10 -133.4(2) . . . . ?
O3 C8 C9 C14 -132.8(3) . . . . ?
N1 C8 C9 C14 45.8(3) . . . . ?
C14 C9 C10 C11 0.6(4) . . . . ?
C8 C9 C10 C11 179.8(3) . . . . ?
C9 C10 C11 C12 -0.1(6) . . . . ?
C10 C11 C12 C13 0.5(7) . . . . ?
C11 C12 C13 C14 -1.3(6) . . . . ?
C12 C13 C14 C9 1.8(4) . . . . ?
C10 C9 C14 C13 -1.5(4) . . . . ?
C8 C9 C14 C13 179.3(2) . . . . ?
C3 N2 C15 O4 6.0(4) . . . . ?
C18 N2 C15 O4 -177.5(2) . . . . ?
C3 N2 C15 C16 -175.64(19) . . . . ?
C18 N2 C15 C16 0.8(3) . . . . ?
O4 C15 C16 C17 177.6(3) . . . . ?
N2 C15 C16 C17 -0.7(3) . . . . ?
C15 C16 C17 C18 0.4(3) . . . . ?
C15 N2 C18 C17 -0.5(3) . . . . ?
C3 N2 C18 C17 175.8(2) . . . . ?
C16 C17 C18 N2 0.0(3) . . . . ?
C7 C6 C20 O5 138.87(19) . . . . ?
C5 C6 C20 O5 -37.4(3) . . . . ?
C7 C6 C20 C21 -38.9(2) . . . . ?
C5 C6 C20 C21 144.86(16) . . . . ?
O5 C20 C21 C22 159.77(18) . . . . ?
C6 C20 C21 C22 -22.5(3) . . . . ?
O5 C20 C21 C26 -18.8(3) . . . . ?
C6 C20 C21 C26 158.88(17) . . . . ?
C26 C21 C22 C23 0.1(3) . . . . ?
C20 C21 C22 C23 -178.49(18) . . . . ?
C21 C22 C23 C24 -1.2(3) . . . . ?
C22 C23 C24 C25 1.3(4) . . . . ?
C23 C24 C25 C26 -0.3(4) . . . . ?
C24 C25 C26 C21 -0.8(4) . . . . ?
C22 C21 C26 C25 0.9(3) . . . . ?
C20 C21 C26 C25 179.57(19) . . . . ?
 
loop_
 _geom_hbond_atom_site_label_D
 _geom_hbond_atom_site_label_H
 _geom_hbond_atom_site_label_A
 _geom_hbond_distance_DH
 _geom_hbond_distance_HA
 _geom_hbond_distance_DA
 _geom_hbond_angle_DHA
 _geom_hbond_site_symmetry_A
N1 H1 O1  0.86 2.32 3.0620(18) 145.2 2_667
 
_diffrn_measured_fraction_theta_max    0.989
_diffrn_reflns_theta_full              27.52
_diffrn_measured_fraction_theta_full   0.989
_refine_diff_density_max    0.271
_refine_diff_density_min   -0.296
_refine_diff_density_rms    0.040
